# Supplementary material
Source: PubMed Central journal article supplement (PMC3769884)
Supplement: neo1509_1049SD1.pdf [file neo1509_1049SD1.pdf]

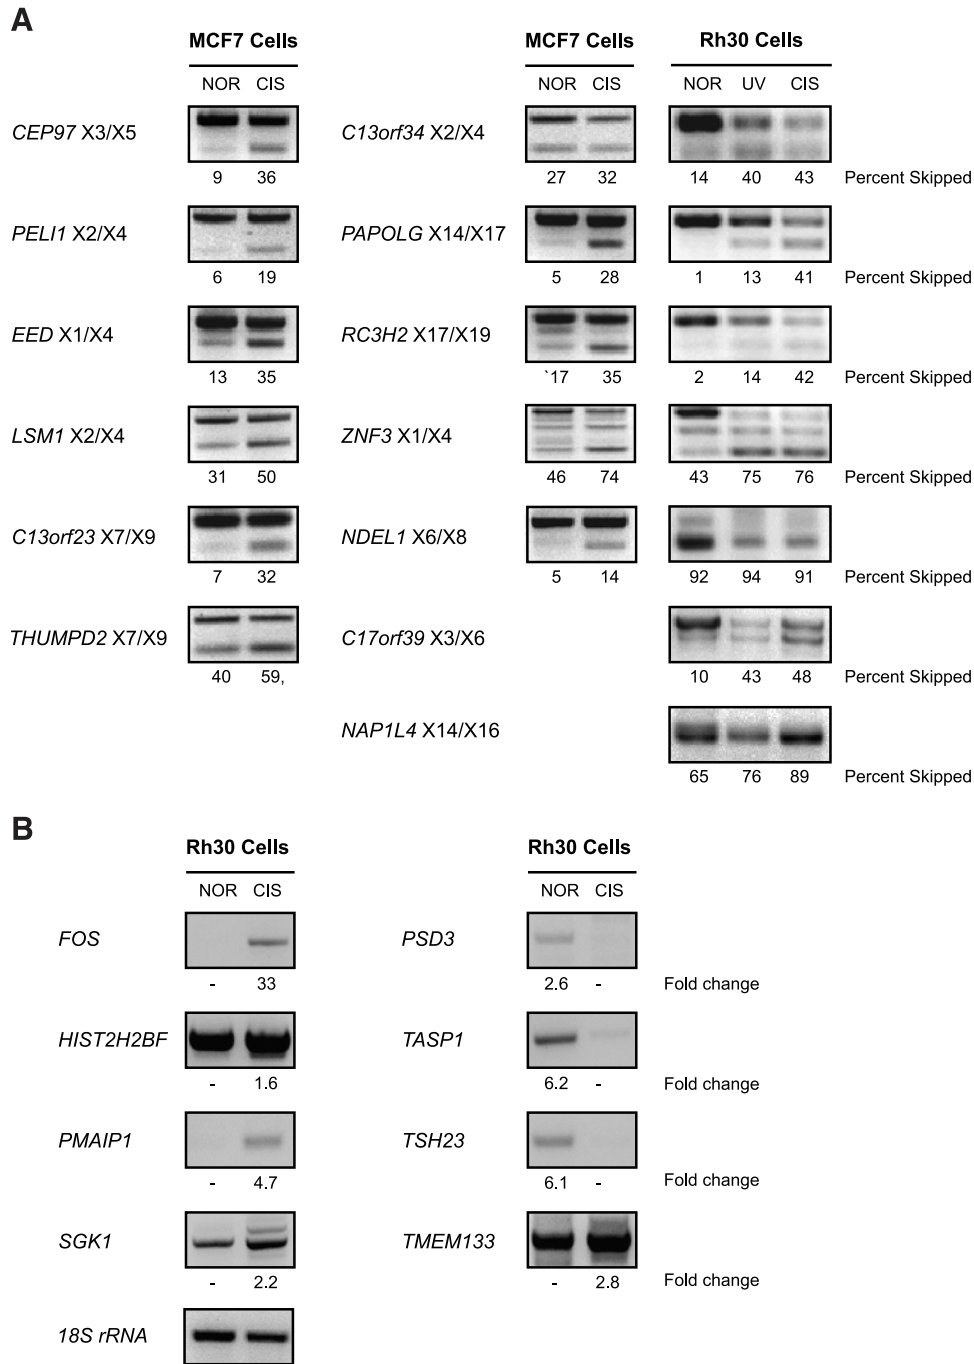

**Figure W2.** Validation of exon microarray targets in Rh30 and MCF7 cell lines. Rh30 and MCF7 cells were treated with 75  $\mu$ M cisplatin or 50 J/m<sup>2</sup> UV as indicated for 24 hours, and total RNA was harvested. (A) Fifteen targets from the exon microarray that were predicted to show significantly altered splicing of cassette exons under stress were tested in these cell lines. Of the 15 targets, 12 were validated in Rh30 cells and 11 in MCF7 cells, and they recapitulated the splicing changes predicted by the exon array. The 11 targets validated in MCF7 cells and 7 of the 12 targets in Rh30 cells (the validation of the other 5 targets is shown in Figure 6) are shown here. (B) Eight targets that were predicted in the exon microarray to show significantly altered gene expression (increase or decrease) under cisplatin treatment were validated in Rh30 cells for differential expression between normal and cisplatin-treated conditions. Seven of the eight targets recapitulated the predicted expression changes (*TMEM133* being the exception).

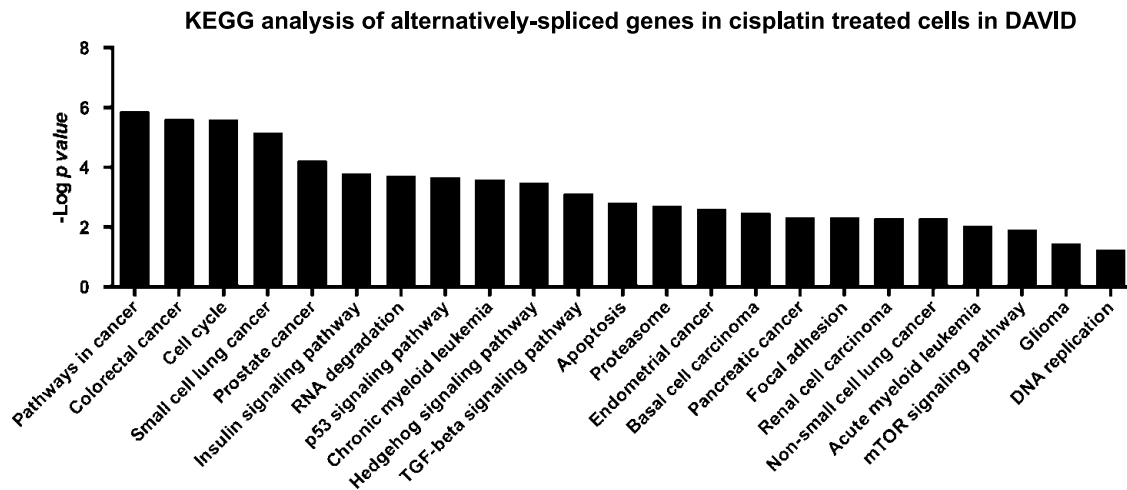

**Figure W3.** Pathway enrichment analysis of genotoxic stress-induced alternatively spliced genes reveals enrichment of genes involved cancer and related pathways. Alternatively spliced genes (alternative splicing  $P < .05$  including FDR) were analyzed for ontology using DAVID bioinformatics tools. Y values indicate  $-\log_{10}$  of the enrichment  $P$  values, denoting the magnitude of correlation between the alternatively spliced gene sets and established molecular pathways. While the genes showing alterations in splicing patterns under cisplatin treatment fell into a number of categories of biologic processes, we have represented here the most relevant and highly enriched pathways relating to cancer and associated cellular processes.
