# Supplementary material
Source: PubMed Central journal article supplement (PMC3769884)
Supplement: neo1509_1049SD2.pdf [file neo1509_1049SD2.pdf]

Supplementary Table 1: Clinical pathology and MDM2 and MDM4 status in human RMS tissue samples

| <u>Rhabdomyosarcoma sample</u> | <u>Type</u> | <u>Translocation</u>  | <u>MDM2-ALT1</u> | <u>MDM4-ALT2</u> | <u>p53 mutation</u> |
|--------------------------------|-------------|-----------------------|------------------|------------------|---------------------|
| A0841                          | Alveolar    | t(1;13)               | Y                | N                | N                   |
| A0295                          | Alveolar    | t(1;13)               | Y                | N/A              | N                   |
| A332                           | Alveolar    | t(1;13)               | Y                | N                | N                   |
| A1008                          | Alveolar    | t(1;13)               | Y                | Y                | N                   |
| A1258                          | Alveolar    | t(1;13)               | Y                | Y                | N                   |
| A2065                          | Alveolar    | t(1;13)               | Y                | Y                | N                   |
| A4233                          | Alveolar    | t(1;13)               | Y                | N                | N                   |
| A1137                          | Alveolar    | t(1;13)               | Y                | N                | N                   |
| A0897                          | Alveolar    | t(2;13)               | Y                | N                | N                   |
| A0167                          | Alveolar    | t(2;13)               | N                | Y                | N                   |
| A4217                          | Alveolar    | t(2;13)               | Y                | Y                | N                   |
| A037                           | Alveolar    | t(2;13)               | Y                | N                | ND                  |
| A0161                          | Alveolar    | t(2;13)               | Y                | N                | ND                  |
| A1067                          | Alveolar    | t(2;13)               | Y                | N/A              | N                   |
| A4186                          | Alveolar    | t(2;13)               | Y                | Y                | N                   |
| A271                           | Alveolar    | t(2;13)               | Y                | Y                | N                   |
| A4193                          | Alveolar    | t(2;13)               | Y                | Y                | Y                   |
| A0373                          | Alveolar    | no translocation      | Y                | N                | N                   |
| A0703                          | Alveolar    | no translocation      | Y                | N                | N                   |
| A059                           | Alveolar    | no translocation      | N                | Y                | N                   |
| A201                           | Alveolar    | no translocation      | N                | N/A              | N                   |
| A1063                          | Alveolar    | no translocation -FA  | Y                | Y                | ND                  |
| A1043                          | Alveolar    | no translocation      | N                | N                | Y                   |
| A1049                          | Alveolar    | no translocation      | Y                | N/A              | ND                  |
| A0298                          | Alveolar    | no translocation - FA | Y                | N                | N                   |
| A0211                          | Alveolar    | no translocation      | Y                | N                | ND                  |
| A1054                          | Alveolar    | no translocation      | Y                | N                | ND                  |
| E009                           | Embryonal   | Not peromed           | N                | N                | ND                  |
| E3004                          | Embryonal   | Not peromed           | N                | N                | N                   |
| E0225                          | Embryonal   | Not peromed           | Y                | Y                | N                   |
| E0259                          | Embryonal   | Not peromed           | N                | N                | N                   |
| E0700                          | Embryonal   | Not peromed           | Y                | Y                | N                   |
| E0658                          | Embryonal   | Not peromed           | Y                | N                | ND                  |
| E208                           | Embryonal   | Not peromed           | Y                | N                | ND                  |
| E0272                          | Embryonal   | Not peromed           | Y                | Y                | ND                  |
| E3006                          | Embryonal   | Not peromed           | N                | Y                | N                   |
| E6001                          | Embryonal   | Not peromed           | N                | N                | N                   |
| E4014                          | Embryonal   | Not peromed           | N                | N                | ND                  |
| E078                           | Embryonal   | Not peromed           | Y                | N                | N                   |

|         |                               |                      |   |     |    |
|---------|-------------------------------|----------------------|---|-----|----|
| E0712   | Embryonal                     | Not performed        | N | N   | N  |
| E1241   | Embryonal                     | Not performed        | Y | Y   | ND |
| E1099   | Embryonal                     | Not performed        | Y | N   | N  |
| E1098   | Embryonal                     | Not performed        | Y | Y   | N  |
| E0365   | Embryonal                     | Not performed        | Y | N   | Y  |
| E1007   | Embryonal                     | Not performed        | Y | N   | N  |
| E0449   | Embryonal                     | Not performed        | Y | N   | N  |
| E215    | Embryonal                     | Not performed        | Y | N   | N  |
| E2035   | Embryonal                     | <b>Not performed</b> | Y | Y   | N  |
| E4053   | Embryonal                     | Not performed        | Y | Y   | N  |
| E4068   | Embryonal                     | Not performed        | Y | Y   | N  |
| N1008   | <b>Normal muscle</b>          | no translocation     | N | N   | ND |
| N0897   | <b>Normal muscle</b>          | Not performed        | N | N   | N  |
| N1007   | <b>Normal muscle</b>          | Not performed        | N | N   | N  |
| N1099   | <b>Normal muscle</b>          | Not performed        | N | N   | ND |
| N6001   | <b>Normal muscle</b>          | Not performed        | N | N   | ND |
| Ana261  | Anaplastic<br>(ERMS, focal)   |                      | N | N   | N  |
| Ana442  | Anaplastic<br>(ERMS, diffuse) |                      | N | N   | N  |
| Ana1109 | Anaplastic<br>(ERMS, diffuse) |                      | N | N   | ND |
| Ana2016 | Anaplastic<br>(ERMS, diffuse) |                      | N | N   | Y  |
| Ana4063 | Anaplastic<br>(ARMS, ???)     |                      | N | N   | N  |
| Ana4142 | Anaplastic<br>(ERMS, focal)   |                      | N | N   | N  |
| Ana4055 | Anaplastic<br>(ERMS, focal)   |                      | N | N/A | N  |
| Ana6037 | Anaplastic<br>(ERMS, focal)   |                      | N | N   | N  |
| Ana2013 | Anaplastic<br>(ARMS, focal)   | t(2;13)              | Y | N   | N  |
| Ana2011 | Anaplastic<br>(ARMS, focal)   |                      | N | N   | N  |
| Ana1036 | Anaplastic<br>(ARMS, focal)   |                      | N | N/A | Y  |
| Ana0141 | Anaplastic<br>(ARMS, diffuse) |                      | Y | N   | N  |
| Ana0518 | Anaplastic<br>(ERMS, focal)   |                      | N | N   | N  |
| Ana0129 | Anaplastic<br>(ERMS, diffuse) |                      | N | N   | N  |
| Ana0760 | Anaplastic<br>(ARMS, diffuse) |                      | N | N   | N  |
| Ana0458 | Anaplastic<br>(ERMS, focal)   |                      | N | N   | Y  |
| Ana0149 | Anaplastic<br>(ERMS, diffuse) |                      | N | N   | Y  |
| Ana0004 | Anaplastic<br>(ARMS, diffuse) |                      | N | N   | N  |
| Ana0664 | Anaplastic<br>(ERMS, diffuse) |                      | N | N   | N  |
| Ana0606 | Anaplastic<br>(ERMS, focal)   |                      | N | N   | N  |

**Supplementary table S2A: Alternative splicing validation**

| Primer Name                                | Sequence                                           | Length   | Annealing Temperature TA | Product Size      |
|--------------------------------------------|----------------------------------------------------|----------|--------------------------|-------------------|
| <i>CEP97 X3F</i><br><i>CEP97 X5R</i>       | GGTGTGGCCAAGCTGACGTTGC<br>GCAGGTGCCATTCTAAGAGAGG   | 22<br>22 | 56°C                     | 275/173bp         |
| <i>PELI1 X2F</i><br><i>PELI1 X4R</i>       | CCAAGGCTCCTGACCAGTGAAC<br>CTGAAACATATCGGTGTTGCTGTG | 22<br>24 | 56°C                     | 352/222bp         |
| <i>EED X1F</i><br><i>EED X4R</i>           | CCAAGAAGCAGAAGCTGAGCAG<br>CCGGATTTCTCCTTGTGAATG    | 22<br>21 | 56°C                     | 347/254/194/101bp |
| <i>LSM1 X2F</i><br><i>LSM1 X4R</i>         | CTTGTTCTGCTTCGAGATGG<br>GGTCTGCTGTTCCACCCTTTG      | 21<br>21 | 56°C                     | 262/146bp         |
| <i>C13orf23 X7F</i><br><i>C13orf23 X9R</i> | GATACCTCCATGCCGACCAC<br>CTGTATAGGTTTTGACGGATTC     | 20<br>22 | 56°C                     | 163/76bp          |
| <i>C13orf34 X2F</i><br><i>C13orf34 X4R</i> | CCATGAACAACTCTCGCCAG<br>GTCTCCACATCTTTATC          | 21<br>18 | 56°C                     | 181/74bp          |
| <i>C17orf39 X3F</i><br><i>C17orf39 X6R</i> | GAGTATCCAACCCTTACAACCTC<br>GCAGCCCAGCAGGGACTG      | 23<br>18 | 56°C                     | 957/855bp         |
| <i>NAP1L4 X14F</i><br><i>NAP1L4 X16R</i>   | GAATTAGAAGGTGACGAGGAGG<br>CCAGGGAAGTCCAGAGCTAC     | 22<br>20 | 56°C                     | 398/360bp         |
| <i>NDEL1 X6F</i><br><i>NDEL1 X8R</i>       | CGGCTCCTAGCTCTCCAACCTC<br>CGTGATGCTTGGTCCTTTGC     | 21<br>20 | 56°C                     | 268/176bp         |
| <i>PAPOLG X14F</i><br><i>PAPOLG X17R</i>   | CCGTGTACTTGTGGAAACTTGG<br>GGATTGAAGTCCGCCCGAG      | 23<br>19 | 56°C                     | 251/141bp         |
| <i>RC3H2 X17F</i><br><i>RC3H2 X19R</i>     | GGCCATGCAACAGAAGTGG<br>GGTGCTGCTGTACTGGATGCC       | 19<br>21 | 56°C                     | 271/157bp         |
| <i>THUMP2 X7F</i><br><i>THUMP2 X9R</i>     | GGAAGCTGCTAAAGAATGGC<br>CACTTTCTGAAGGCAATGGC       | 20<br>20 | 56°C                     | 161/46bp          |
| <i>ZNF3 X1F</i><br><i>ZNF3 X4R</i>         | GTGACAGGGTCCAACAGGGC<br>GGACTTGGCCTTTAGGAGCG       | 20<br>20 | 56°C                     | 399/282/268/151bp |

**PCR Program:**

| Step                 | Temperature | Time |       |
|----------------------|-------------|------|-------|
| Initial Denaturation | 94°C        | 4:00 |       |
| Denaturation         | 94°C        | 0:30 | } 35x |
| Annealing            | TA          | 0:30 |       |
| Extension            | 72°C        | 2:00 |       |
| Final Extension      | 72°C        | 7:00 |       |
| End                  | 4°C         | ∞    |       |

**Supplementary table S2B: Gene expression validation**

| Primer Name                              | Sequence                                     | Length   | Annealing Temperature TA | Product Size |
|------------------------------------------|----------------------------------------------|----------|--------------------------|--------------|
| <i>TASP1 F</i><br><i>TASP1 R</i>         | GTGGACCACGAAGGGAATGT<br>AGGACAATCACTCCGCCAAG | 20<br>20 | 65.4°C                   | 320bp        |
| <i>TSHZ3 F</i><br><i>TSHZ3 R</i>         | GAGAAGCATCATGCCGAGGA<br>CGACACAGTCGTGTCTTCCA | 20<br>20 | 60°C                     | 346bp        |
| <i>PSD3 F</i><br><i>PSD3 R</i>           | ACAATGCATCTGCACATTCCC<br>GCAGGGAGCGTTTTGTGAC | 21<br>20 | 60°C                     | 523bp        |
| <i>TMEM133 F</i><br><i>TMEM133 R</i>     | CCTTTTCCCCTTGCCACTCA<br>AGGAGGCAGTTGAGGGTACA | 20<br>20 | 60°C                     | 521bp        |
| <i>HIST2H2BF F</i><br><i>HIST2H2BF R</i> | AGTGTGCAAGGGACGCAATA<br>AGGCTAAGGGACGAAAGCAC | 20<br>20 | 60°C                     | 532bp        |
| <i>PMAIP1 F</i><br><i>PMAIP1 R</i>       | ACTGGACAAAAGCGTGGTCT<br>CACAGTAGGCCAGCGGTAAT | 20<br>20 | 60°C                     | 726bp        |
| <i>SGK1 F</i><br><i>SGK1 R</i>           | AAACTGAGGCTGCTAAGGGC<br>CAGTGAATGCAGGTAGCCCA | 20<br>20 | 54.6°C                   | 638bp        |
| <i>FOS F</i><br><i>FOS R</i>             | TACTACCACTCACCCGAGA<br>CAGGTTGGCAATCTCGGTCT  | 20<br>20 | 65.4°C                   | 474bp        |

**PCR Program:**

| Step                 | Temperature | Time |
|----------------------|-------------|------|
| Initial Denaturation | 94°C        | 4:00 |
| Denaturation         | 94°C        | 0:30 |
| Annealing            | TA          | 0:30 |
| Extension            | 72°C        | 2:00 |
| Final Extension      | 72°C        | 7:00 |
| End                  | 4°C         | ∞    |

} 25x

**Supplementary table S3A: Genes showing alternative splicing only between normal and cisplatin treated conditions**

| Transcript Cluster ID | Gene Symbol | p-value(Condition) | Alt-splicing(Condition) | Fold-Change(Cis vs. Nor) | Fold-Change(Cis vs. Nor) (Description) |
|-----------------------|-------------|--------------------|-------------------------|--------------------------|----------------------------------------|
| 3323052               | NAV2        | 7.46E-05           | 0                       | -2.33621                 | Cis down vs Nor                        |
| 3606304               | AKAP13      | 0.000136924        | 0                       | -3.30542                 | Cis down vs Nor                        |
| 2400373               | EIF4G3      | 0.00507531         | 0                       | -1.5698                  | Cis down vs Nor                        |
| 2431112               | NOTCH2      | 0.00545317         | 0                       | -1.27761                 | Cis down vs Nor                        |
| 2405992               | ZMYM6       | 0.0201367          | 0                       | 1.31167                  | Cis up vs Nor                          |
| 3134034               | PRKDC       | 0.0349434          | 0                       | 1.16894                  | Cis up vs Nor                          |
| 3508898               | STARD13     | 1.45E-05           | 2.80E-45                | -3.94034                 | Cis down vs Nor                        |
| 2652410               | FNDC3B      | 0.000659431        | 7.43E-44                | -3.11135                 | Cis down vs Nor                        |
| 3874023               | PTPRA       | 0.00245178         | 7.71E-44                | -1.17647                 | Cis down vs Nor                        |
| 3615579               | TJP1        | 0.197427           | 8.27E-44                | -1.09277                 | Cis down vs Nor                        |
| 3371544               | AMBRA1      | 0.00102311         | 8.27E-43                | -1.50585                 | Cis down vs Nor                        |
| 2520291               | GLS         | 0.0226767          | 1.91E-38                | 1.55746                  | Cis up vs Nor                          |
| 3331487               | CTNND1      | 0.0165024          | 2.03E-38                | -1.1836                  | Cis down vs Nor                        |
| 3336696               | KDM2A       | 0.115242           | 6.36E-38                | -1.0935                  | Cis down vs Nor                        |
| 3140037               | EYA1        | 0.00077385         | 1.05E-37                | -2.52569                 | Cis down vs Nor                        |
| 3049522               | TNS3        | 0.000122108        | 3.51E-37                | -2.51066                 | Cis down vs Nor                        |
| 3874313               | ATRN        | 0.0948303          | 1.80E-36                | -1.12233                 | Cis down vs Nor                        |
| 3633403               | SIN3A       | 0.00110077         | 2.05E-35                | -1.79065                 | Cis down vs Nor                        |
| 3737488               | RPTOR       | 0.000186187        | 4.04E-35                | -2.32963                 | Cis down vs Nor                        |
| 2933536               | TULP4       | 0.00179835         | 9.03E-35                | -2.06319                 | Cis down vs Nor                        |
| 2973376               | PTPRK       | 0.000842233        | 9.24E-35                | -3.12999                 | Cis down vs Nor                        |
| 2965206               | EPHA7       | 0.000122149        | 8.83E-34                | -2.5066                  | Cis down vs Nor                        |
| 3195400               | EHMT1       | 0.00148384         | 1.43E-33                | -1.69779                 | Cis down vs Nor                        |
| 3190558               | SPTAN1      | 0.00300411         | 1.66E-33                | 1.31892                  | Cis up vs Nor                          |
| 3918779               | ITSN1       | 0.000199257        | 3.42E-33                | -1.58476                 | Cis down vs Nor                        |
| 3462094               | ZFC3H1      | 0.162935           | 5.67E-33                | 1.16598                  | Cis up vs Nor                          |
| 3156307               | PTK2        | 0.000394114        | 6.29E-33                | -2.31601                 | Cis down vs Nor                        |
| 3553607               | EIF5        | 9.52E-05           | 8.45E-33                | 1.70027                  | Cis up vs Nor                          |
| 3881874               | ASXL1       | 0.000569889        | 1.13E-32                | -1.8931                  | Cis down vs Nor                        |
| 3609138               | CHD2        | 0.110058           | 1.14E-32                | 1.13262                  | Cis up vs Nor                          |
| 3177880               | DAPK1       | 0.000110939        | 1.44E-32                | -3.83588                 | Cis down vs Nor                        |
| 3820663               | ILF3        | 0.954442           | 2.08E-32                | 1.00264                  | Cis up vs Nor                          |
| 2404254               | PUM1        | 0.00031956         | 3.46E-32                | -1.81006                 | Cis down vs Nor                        |
| 3150060               | EXT1        | 1.29E-05           | 5.92E-32                | -2.98092                 | Cis down vs Nor                        |
| 2776372               | WDFY3       | 0.000705697        | 7.33E-32                | -2.11714                 | Cis down vs Nor                        |
| 3046197               | ELMO1       | 0.000106658        | 9.14E-32                | -3.89017                 | Cis down vs Nor                        |
| 3278401               | FRMD4A      | 7.70E-05           | 1.14E-31                | -2.08979                 | Cis down vs Nor                        |
| 3353914               | VWA5A       | 0.00283332         | 2.18E-31                | 1.78271                  | Cis up vs Nor                          |
| 2395245               | RERE        | 0.990177           | 2.30E-31                | -1.00108                 | Cis down vs Nor                        |
| 3464983               | ATP2B1      | 0.000264261        | 2.43E-31                | -2.23315                 | Cis down vs Nor                        |
| 2969677               | REV3L       | 0.0015344          | 2.72E-31                | -1.74766                 | Cis down vs Nor                        |
| 3253683               | ZMIZ1       | 7.64E-05           | 5.95E-31                | -2.73094                 | Cis down vs Nor                        |
| 2326640               | ARID1A      | 0.00768369         | 7.07E-31                | -1.44137                 | Cis down vs Nor                        |
| 2934801               | MAP3K4      | 3.39E-05           | 1.35E-30                | -1.60696                 | Cis down vs Nor                        |
| 2353881               | MAN1A2      | 0.00997449         | 2.05E-30                | -1.38575                 | Cis down vs Nor                        |
| 2998536               | CDK13       | 0.000477345        | 2.44E-30                | -1.32971                 | Cis down vs Nor                        |
| 2748198               | KIAA0922    | 0.000126195        | 2.90E-30                | -3.70038                 | Cis down vs Nor                        |
| 2429147               | DENND2C     | 0.0676102          | 3.04E-30                | -1.29719                 | Cis down vs Nor                        |
| 3677795               | CREBBP      | 0.00169241         | 4.09E-30                | -1.92777                 | Cis down vs Nor                        |
| 3715368               | NLK         | 0.000215357        | 1.27E-29                | -2.36332                 | Cis down vs Nor                        |
| 2715820               | HTT         | 0.104754           | 2.72E-29                | -1.12942                 | Cis down vs Nor                        |
| 3542207               | SRSF5       | 0.0118689          | 2.82E-29                | 1.5936                   | Cis up vs Nor                          |
| 3458735               | AGAP2       | 0.0111178          | 3.72E-29                | 1.33292                  | Cis up vs Nor                          |
| 3750625               | POLDIP2     | 0.000547992        | 4.59E-29                | 1.44992                  | Cis up vs Nor                          |
| 3240340               | WAC         | 0.000160021        | 6.39E-29                | -1.64188                 | Cis down vs Nor                        |
| 2732655               | FRAS1       | 0.231411           | 6.88E-29                | 1.30272                  | Cis up vs Nor                          |
| 2930243               | SASH1       | 0.000191561        | 9.18E-29                | -1.52968                 | Cis down vs Nor                        |
| 3303652               | MRPL43      | 0.00285371         | 9.81E-29                | 1.70494                  | Cis up vs Nor                          |
| 2408855               | FOXJ3       | 5.95E-05           | 1.55E-28                | -2.30948                 | Cis down vs Nor                        |
| 3283920               | ARHGAP12    | 0.000152497        | 2.05E-28                | -2.92059                 | Cis down vs Nor                        |
| 2943874               | KIF13A      | 0.000167732        | 3.10E-28                | -2.01122                 | Cis down vs Nor                        |
| 3458857               | AVIL        | 0.00051879         | 7.26E-28                | 2.16524                  | Cis up vs Nor                          |
| 3672368               | KIAA0182    | 0.00964122         | 8.07E-28                | -1.362                   | Cis down vs Nor                        |
| 3660858               | CHD9        | 0.00174979         | 1.13E-27                | -1.20312                 | Cis down vs Nor                        |
| 2518889               | ZNF804A     | 2.18E-05           | 1.33E-27                | -4.62297                 | Cis down vs Nor                        |
| 3843463               | ZNF776      | 0.975049           | 1.41E-27                | 1.00319                  | Cis up vs Nor                          |
| 2400793               | HSPG2       | 0.0351325          | 1.61E-27                | 1.45843                  | Cis up vs Nor                          |
| 2975867               | MAP3K5      | 0.000161323        | 1.75E-27                | -2.89776                 | Cis down vs Nor                        |
| 3908149               | ZMYND8      | 3.09E-05           | 2.46E-27                | -2.23391                 | Cis down vs Nor                        |
| 2503374               | GLI2        | 0.00155081         | 3.33E-27                | -1.53798                 | Cis down vs Nor                        |
| 3376235               | WDR74       | 0.000343032        | 5.80E-27                | 2.32754                  | Cis up vs Nor                          |
| 2874794               | RAPGEF6     | 0.000226771        | 1.07E-26                | -2.27093                 | Cis down vs Nor                        |
| 2343823               | LPHN2       | 3.42E-05           | 1.16E-26                | -3.55122                 | Cis down vs Nor                        |
| 2554975               | BCL11A      | 0.000325627        | 1.31E-26                | -2.05233                 | Cis down vs Nor                        |
| 2542816               | PUM2        | 0.000698599        | 1.68E-26                | -1.94394                 | Cis down vs Nor                        |
| 3779817               | CEP192      | 0.0468254          | 1.69E-26                | 1.24384                  | Cis up vs Nor                          |
| 3407229               | AEBP2       | 0.000398379        | 2.09E-26                | -2.62089                 | Cis down vs Nor                        |
| 3092808               | NRG1        | 0.000321622        | 2.12E-26                | -1.83323                 | Cis down vs Nor                        |
| 2892979               | CDYL        | 1.26E-06           | 2.17E-26                | -2.49978                 | Cis down vs Nor                        |
| 2326049               | MAN1C1      | 7.66E-05           | 2.31E-26                | -2.79963                 | Cis down vs Nor                        |
| 3066297               | SRPK2       | 0.000568582        | 2.32E-26                | -2.26195                 | Cis down vs Nor                        |
| 3542689               | PCNX        | 0.000219072        | 4.53E-26                | -1.78463                 | Cis down vs Nor                        |
| 3738969               | FO XK2      | 0.0022062          | 5.12E-26                | -1.75499                 | Cis down vs Nor                        |

|         |           |             |          |          |                 |
|---------|-----------|-------------|----------|----------|-----------------|
| 3310041 | FGFR2     | 0.00170035  | 1.56E-25 | -3.81608 | Cis down vs Nor |
| 3912718 | TAF4      | 0.101406    | 2.41E-25 | -1.29913 | Cis down vs Nor |
| 3229529 | CAMSAP1   | 0.00055943  | 2.66E-25 | -2.11285 | Cis down vs Nor |
| 2883878 | EBF1      | 0.00243235  | 3.06E-25 | -2.43101 | Cis down vs Nor |
| 2582562 | ACVR1     | 0.000655812 | 3.32E-25 | -2.00833 | Cis down vs Nor |
| 2740067 | ANK2      | 0.0480946   | 3.99E-25 | -1.41904 | Cis down vs Nor |
| 3148796 | NUDCD1    | 0.111061    | 4.63E-25 | -1.19511 | Cis down vs Nor |
| 2600689 | EPHA4     | 0.000387923 | 4.81E-25 | -3.49629 | Cis down vs Nor |
| 3930360 | RUNX1     | 0.000318732 | 5.64E-25 | -1.78295 | Cis down vs Nor |
| 2532510 | GIGYF2    | 0.0011796   | 7.95E-25 | -2.15973 | Cis down vs Nor |
| 3818732 | ARHGEF18  | 0.000244764 | 8.18E-25 | -1.39942 | Cis down vs Nor |
| 3732448 | BPTF      | 0.0616993   | 9.75E-25 | -1.22076 | Cis down vs Nor |
| 2367793 | KLHL20    | 0.330962    | 1.00E-24 | -1.09332 | Cis down vs Nor |
| 2600881 | PAX3      | 0.0823766   | 1.06E-24 | 1.22522  | Cis up vs Nor   |
| 3400413 | ERC1      | 0.000251048 | 1.11E-24 | -2.14418 | Cis down vs Nor |
| 3837001 | GRLF1     | 0.000191849 | 1.29E-24 | -2.18556 | Cis down vs Nor |
| 3962678 | PACSIN2   | 0.000117723 | 1.32E-24 | -2.19358 | Cis down vs Nor |
| 3454576 | SLC11A2   | 0.011084    | 1.37E-24 | -1.5385  | Cis down vs Nor |
| 2453370 | PLXNA2    | 0.000182302 | 1.51E-24 | -2.10806 | Cis down vs Nor |
| 3517793 | KLF12     | 1.06E-05    | 1.55E-24 | -3.31697 | Cis down vs Nor |
| 3418394 | SLC26A10  | 0.0955475   | 2.24E-24 | 1.57879  | Cis up vs Nor   |
| 3361971 | ST5       | 0.000187348 | 2.53E-24 | -2.07278 | Cis down vs Nor |
| 3703885 | SLC7A5    | 0.00415276  | 3.27E-24 | -1.64795 | Cis down vs Nor |
| 3923436 | TRAPPC10  | 0.00143748  | 3.64E-24 | -1.4675  | Cis down vs Nor |
| 2320762 | VPS13D    | 0.00483262  | 4.44E-24 | -1.23405 | Cis down vs Nor |
| 3708366 | C17orf81  | 0.00240448  | 5.74E-24 | 1.3949   | Cis up vs Nor   |
| 2491386 | TCF7L1    | 0.000652038 | 9.66E-24 | -2.03155 | Cis down vs Nor |
| 3618333 | MEIS2     | 0.000969683 | 1.09E-23 | -2.20685 | Cis down vs Nor |
| 2726828 | DCUN1D4   | 0.012952    | 1.26E-23 | -1.50519 | Cis down vs Nor |
| 3760137 | KIAA1267  | 0.00051881  | 1.45E-23 | -1.79949 | Cis down vs Nor |
| 2952102 | MTCH1     | 0.02395     | 1.60E-23 | 1.17092  | Cis up vs Nor   |
| 3572041 | KIAA0317  | 0.00102645  | 2.05E-23 | -1.56788 | Cis down vs Nor |
| 3794458 | ZNF236    | 0.0668134   | 2.23E-23 | 1.08772  | Cis up vs Nor   |
| 2423017 | EVI5      | 0.00643119  | 2.40E-23 | -2.06792 | Cis down vs Nor |
| 3528172 | TRAJ17    | 0.304014    | 3.27E-23 | -1.11188 | Cis down vs Nor |
| 3666033 | NFATC3    | 0.00155802  | 3.57E-23 | -1.48655 | Cis down vs Nor |
| 3906160 | CHD6      | 0.00018112  | 3.76E-23 | -2.00651 | Cis down vs Nor |
| 3501661 | ARHGEF7   | 5.26E-06    | 4.59E-23 | -2.63583 | Cis down vs Nor |
| 3891447 | EDN3      | 0.00199372  | 4.66E-23 | -2.4993  | Cis down vs Nor |
| 3376155 | NXF1      | 1.68E-05    | 5.22E-23 | 2.73758  | Cis up vs Nor   |
| 3903525 | NCOA6     | 0.0261884   | 5.80E-23 | -1.38111 | Cis down vs Nor |
| 2715076 | WHSC1     | 0.00648023  | 6.03E-23 | -1.31981 | Cis down vs Nor |
| 3454223 | RACGAP1   | 0.00804699  | 7.64E-23 | -1.24151 | Cis down vs Nor |
| 3887479 | EYA2      | 0.000287903 | 9.00E-23 | -3.241   | Cis down vs Nor |
| 3746881 | NCOR1     | 0.000783715 | 9.32E-23 | -1.64495 | Cis down vs Nor |
| 2374746 | NAV1      | 0.00238302  | 1.02E-22 | -2.40505 | Cis down vs Nor |
| 3417842 | LRP1      | 0.0347764   | 1.09E-22 | 1.46572  | Cis up vs Nor   |
| 3304012 | MGEA5     | 0.051406    | 1.12E-22 | 1.25568  | Cis up vs Nor   |
| 3895232 | UBOX5     | 0.10463     | 1.17E-22 | 1.16014  | Cis up vs Nor   |
| 2773023 | ANKRD17   | 8.28E-05    | 1.30E-22 | -1.77014 | Cis down vs Nor |
| 2666566 | NGLY1     | 0.00524765  | 1.48E-22 | -1.51016 | Cis down vs Nor |
| 2862950 | COL4A3BP  | 0.00198707  | 1.68E-22 | -1.74865 | Cis down vs Nor |
| 2720584 | SLIT2     | 0.00539963  | 1.75E-22 | -1.37302 | Cis down vs Nor |
| 2722377 | STIM2     | 1.53E-05    | 1.76E-22 | -2.84513 | Cis down vs Nor |
| 3261165 | BTRC      | 6.37E-05    | 2.54E-22 | -3.48414 | Cis down vs Nor |
| 3153428 | ASAP1     | 0.00351098  | 3.26E-22 | -2.09922 | Cis down vs Nor |
| 3418153 | MARS      | 0.189867    | 3.83E-22 | -1.01624 | Cis down vs Nor |
| 3133345 | SLC20A2   | 2.94E-05    | 4.28E-22 | -2.02587 | Cis down vs Nor |
| 3453177 | C12orf41  | 0.000190982 | 4.90E-22 | 2.36507  | Cis up vs Nor   |
| 3473083 | MED13L    | 6.25E-05    | 5.50E-22 | -2.70191 | Cis down vs Nor |
| 2977621 | PLAGL1    | 0.413374    | 5.61E-22 | -1.13179 | Cis down vs Nor |
| 3883547 | PHF20     | 0.000235653 | 5.85E-22 | -2.12397 | Cis down vs Nor |
| 2553576 | RTN4      | 0.0143902   | 6.12E-22 | 1.22607  | Cis up vs Nor   |
| 3020343 | MET       | 6.07E-05    | 7.63E-22 | -2.80193 | Cis down vs Nor |
| 3030285 | CUL1      | 0.000102456 | 8.02E-22 | -2.01124 | Cis down vs Nor |
| 3391029 | PPP2R1B   | 0.979786    | 9.21E-22 | -1.00229 | Cis down vs Nor |
| 3607447 | ABHD2     | 0.000777599 | 9.81E-22 | -1.50007 | Cis down vs Nor |
| 3498315 | UBAC2     | 0.00204924  | 1.00E-21 | -1.37136 | Cis down vs Nor |
| 3629811 | DENND4A   | 0.00236923  | 1.03E-21 | -1.72916 | Cis down vs Nor |
| 3420079 | LEMD3     | 0.0148836   | 1.07E-21 | -1.27126 | Cis down vs Nor |
| 3016380 | CUX1      | 0.00771349  | 1.13E-21 | -1.24579 | Cis down vs Nor |
| 3013178 | CASD1     | 0.000474868 | 1.24E-21 | -2.54155 | Cis down vs Nor |
| 3959451 | MYH9      | 0.177339    | 1.49E-21 | -1.11792 | Cis down vs Nor |
| 3904594 | C20orf117 | 0.0300499   | 1.57E-21 | -1.20038 | Cis down vs Nor |
| 2427007 | SORT1     | 0.101912    | 1.68E-21 | -1.17911 | Cis down vs Nor |
| 2369843 | CEP350    | 0.00298882  | 1.72E-21 | -1.37846 | Cis down vs Nor |
| 3261971 | CNNM2     | 0.000469141 | 2.07E-21 | -1.69062 | Cis down vs Nor |
| 2549260 | MAP4K3    | 0.000115739 | 2.58E-21 | -3.39439 | Cis down vs Nor |
| 3766716 | TEX2      | 0.000640675 | 2.70E-21 | -2.12779 | Cis down vs Nor |
| 3958658 | LARGE     | 0.00203884  | 3.07E-21 | -1.98978 | Cis down vs Nor |
| 2806091 | RAI14     | 0.0506273   | 3.39E-21 | -1.44954 | Cis down vs Nor |
| 3518496 | MYCBP2    | 0.000731564 | 3.43E-21 | -1.3354  | Cis down vs Nor |
| 2606026 | HDAC4     | 0.000211773 | 4.14E-21 | -1.73486 | Cis down vs Nor |
| 3450899 | SLC2A13   | 0.00265827  | 5.35E-21 | -1.54057 | Cis down vs Nor |
| 3614087 | UBE3A     | 0.00083412  | 5.41E-21 | -1.76855 | Cis down vs Nor |
| 3716893 | ATAD5     | 0.0112592   | 5.46E-21 | -1.63515 | Cis down vs Nor |

|         |             |             |          |          |                 |
|---------|-------------|-------------|----------|----------|-----------------|
| 3812426 | RTTN        | 0.0230257   | 5.65E-21 | -1.22442 | Cis down vs Nor |
| 2594089 | SATB2       | 0.000664121 | 6.25E-21 | -1.73289 | Cis down vs Nor |
| 3610804 | IGF1R       | 0.00043199  | 7.43E-21 | -2.42415 | Cis down vs Nor |
| 3704717 | ANKRD11     | 0.000174309 | 7.84E-21 | -1.95789 | Cis down vs Nor |
| 2482505 | SPTBN1      | 0.113529    | 8.32E-21 | -1.24457 | Cis down vs Nor |
| 3447348 | SOX5        | 0.00037003  | 9.39E-21 | -2.25888 | Cis down vs Nor |
| 2823551 | MAN2A1      | 0.00704824  | 1.20E-20 | -1.50333 | Cis down vs Nor |
| 3476457 | NCOR2       | 0.21797     | 1.44E-20 | -1.16558 | Cis down vs Nor |
| 2943434 | ATXN1       | 0.00929015  | 1.45E-20 | -1.71477 | Cis down vs Nor |
| 3774975 | C17orf101   | 0.0181974   | 1.46E-20 | -1.35565 | Cis down vs Nor |
| 3238962 | KIAA1217    | 0.00192702  | 1.50E-20 | -2.43848 | Cis down vs Nor |
| 2903343 | BRD2        | 5.46E-06    | 1.90E-20 | 2.12622  | Cis up vs Nor   |
| 2896177 | JARID2      | 0.000626046 | 1.95E-20 | -2.94971 | Cis down vs Nor |
| 3219885 | PTPN3       | 2.19E-05    | 2.17E-20 | -2.06709 | Cis down vs Nor |
| 4009506 | PHF8        | 0.00579397  | 2.22E-20 | -1.81536 | Cis down vs Nor |
| 3164601 | KIAA1797    | 0.146549    | 2.89E-20 | -1.16372 | Cis down vs Nor |
| 3268059 | TACC2       | 0.000572394 | 3.14E-20 | -1.49386 | Cis down vs Nor |
| 3571553 | C14orf43    | 0.000562955 | 3.23E-20 | -1.57523 | Cis down vs Nor |
| 2458921 | ITPKB       | 0.000258059 | 3.26E-20 | -1.56087 | Cis down vs Nor |
| 3920566 | DYRK1A      | 5.15E-05    | 3.68E-20 | -2.76691 | Cis down vs Nor |
| 3975467 | KDM6A       | 2.61E-05    | 3.72E-20 | -4.39429 | Cis down vs Nor |
| 3698256 | ZFH3        | 0.202655    | 4.16E-20 | -1.20196 | Cis down vs Nor |
| 3418354 | ARHGEF25    | 0.00653609  | 4.76E-20 | 2.02548  | Cis up vs Nor   |
| 3712675 | RAI1        | 0.0117794   | 5.72E-20 | -2.02992 | Cis down vs Nor |
| 2454935 | ANGEL2      | 0.0404064   | 6.23E-20 | 1.27362  | Cis up vs Nor   |
| 3335517 | KAT5        | 0.000187716 | 6.36E-20 | -1.55105 | Cis down vs Nor |
| 2464005 | AKT3        | 0.215255    | 6.74E-20 | 1.13689  | Cis up vs Nor   |
| 3778252 | ANKRD12     | 0.380129    | 7.96E-20 | 1.07214  | Cis up vs Nor   |
| 3847538 | RANBP3      | 0.00171472  | 9.28E-20 | -1.43487 | Cis down vs Nor |
| 3603336 | IREB2       | 0.000617352 | 9.84E-20 | -1.88761 | Cis down vs Nor |
| 2783788 | PRDM5       | 0.599926    | 1.07E-19 | 1.03691  | Cis up vs Nor   |
| 3407096 | PLEKHA5     | 3.68E-06    | 1.08E-19 | -3.08649 | Cis down vs Nor |
| 3483159 | PAN3        | 0.000119501 | 1.21E-19 | -2.3785  | Cis down vs Nor |
| 3619773 | INO80       | 0.000101834 | 1.22E-19 | -1.9629  | Cis down vs Nor |
| 2934191 | PNLDC1      | 0.00046525  | 1.31E-19 | 4.1993   | Cis up vs Nor   |
| 3440598 | FOXM1       | 0.132515    | 1.33E-19 | -1.11098 | Cis down vs Nor |
| 3540862 | GPHN        | 6.96E-05    | 1.33E-19 | -3.45508 | Cis down vs Nor |
| 3627422 | RORA        | 0.000271603 | 1.48E-19 | -1.65343 | Cis down vs Nor |
| 3599811 | KIF23       | 0.0119256   | 1.53E-19 | -1.31802 | Cis down vs Nor |
| 2782292 | C4orf21     | 0.0685831   | 1.75E-19 | -1.20765 | Cis down vs Nor |
| 3968122 | TBL1X       | 0.000309681 | 1.95E-19 | -2.25172 | Cis down vs Nor |
| 3791482 | PHLPP1      | 0.000434982 | 1.96E-19 | -3.04808 | Cis down vs Nor |
| 2676518 | SFMBT1      | 4.02E-05    | 1.99E-19 | -2.48909 | Cis down vs Nor |
| 3282974 | SVIL        | 0.000266844 | 2.28E-19 | -1.86106 | Cis down vs Nor |
| 3255402 | FAM190B     | 0.00141032  | 2.32E-19 | -1.8158  | Cis down vs Nor |
| 2932508 | TIAM2       | 0.000187098 | 2.36E-19 | -2.97666 | Cis down vs Nor |
| 2524301 | NRP2        | 0.000258497 | 2.49E-19 | -1.65678 | Cis down vs Nor |
| 3946192 | TNRC6B      | 1.86E-05    | 2.52E-19 | -1.88227 | Cis down vs Nor |
| 2930418 | UST         | 0.000131724 | 2.83E-19 | -4.66767 | Cis down vs Nor |
| 3184408 | PALM2-AKAP2 | 0.0131876   | 3.33E-19 | -1.57448 | Cis down vs Nor |
| 3006572 | AUTS2       | 0.000108135 | 3.68E-19 | -1.88216 | Cis down vs Nor |
| 3534128 | FAM179B     | 0.0253063   | 3.69E-19 | -1.34449 | Cis down vs Nor |
| 3548152 | TDP1        | 6.84E-05    | 4.53E-19 | -2.22198 | Cis down vs Nor |
| 3473802 | TAK3        | 0.0164054   | 4.77E-19 | -1.76689 | Cis down vs Nor |
| 3552847 | DYNC1H1     | 0.000365003 | 5.42E-19 | 1.8115   | Cis up vs Nor   |
| 3449760 | DENND5B     | 0.000961379 | 5.48E-19 | -2.29435 | Cis down vs Nor |
| 3196842 | RFX3        | 0.00389762  | 5.68E-19 | -1.43231 | Cis down vs Nor |
| 4012204 | HDAC8       | 0.0179808   | 7.24E-19 | -1.28476 | Cis down vs Nor |
| 3695107 | TK2         | 0.673421    | 7.30E-19 | -1.05767 | Cis down vs Nor |
| 3819968 | ZNF177      | 0.0435087   | 7.63E-19 | -1.32949 | Cis down vs Nor |
| 3101893 | CSPP1       | 0.0389012   | 8.27E-19 | -1.50437 | Cis down vs Nor |
| 2858134 | PDE4D       | 0.0076887   | 8.46E-19 | -1.23268 | Cis down vs Nor |
| 3911217 | PMEP1       | 0.000284162 | 8.53E-19 | -2.98434 | Cis down vs Nor |
| 3328389 | EXT2        | 0.458016    | 8.56E-19 | -1.04244 | Cis down vs Nor |
| 2581000 | NEB         | 0.0281105   | 9.19E-19 | 2.07435  | Cis up vs Nor   |
| 3484768 | PDS5B       | 0.000169766 | 9.50E-19 | -2.72587 | Cis down vs Nor |
| 3089360 | SLC39A14    | 0.0293206   | 1.00E-18 | -1.25973 | Cis down vs Nor |
| 3452970 | SENP1       | 0.072726    | 1.01E-18 | -1.15801 | Cis down vs Nor |
| 2879312 | NR3C1       | 0.000546974 | 1.02E-18 | -2.01688 | Cis down vs Nor |
| 2734421 | ARHGAP24    | 4.30E-06    | 1.22E-18 | -4.06693 | Cis down vs Nor |
| 2766588 | PDS5A       | 0.000850316 | 1.24E-18 | -1.81725 | Cis down vs Nor |
| 2739079 | SEC24B      | 0.000111733 | 1.27E-18 | -2.15061 | Cis down vs Nor |
| 2963929 | RNGTT       | 0.000334602 | 1.40E-18 | -2.93626 | Cis down vs Nor |
| 3291682 | JMJD1C      | 2.07E-05    | 1.40E-18 | -2.68373 | Cis down vs Nor |
| 2819044 | RASA1       | 0.00691094  | 1.45E-18 | -1.97702 | Cis down vs Nor |
| 2993206 | MPP6        | 0.316787    | 1.48E-18 | -1.14059 | Cis down vs Nor |
| 3680479 | TXNDC11     | 0.000134321 | 1.65E-18 | -1.60504 | Cis down vs Nor |
| 3249886 | TET1        | 0.0251921   | 1.74E-18 | -1.63458 | Cis down vs Nor |
| 2830861 | EGR1        | 1.15E-05    | 1.93E-18 | 3.47423  | Cis up vs Nor   |
| 3372253 | CELF1       | 0.00208844  | 2.01E-18 | -1.73933 | Cis down vs Nor |
| 3438417 | SFSWAP      | 0.00184687  | 2.03E-18 | -1.37452 | Cis down vs Nor |
| 3787675 | KIAA0427    | 0.00241085  | 2.33E-18 | -1.82376 | Cis down vs Nor |
| 2575196 | SAP130      | 0.000176985 | 2.56E-18 | -1.57936 | Cis down vs Nor |
| 3321512 | PDE3B       | 0.00119133  | 2.68E-18 | -1.85348 | Cis down vs Nor |
| 3845708 | AP3D1       | 0.07064     | 3.31E-18 | -1.21891 | Cis down vs Nor |
| 3091848 | HMBX1       | 0.146976    | 3.41E-18 | -1.14176 | Cis down vs Nor |

|         |          |             |          |          |                 |
|---------|----------|-------------|----------|----------|-----------------|
| 3024275 | MKLN1    | 0.00394351  | 3.73E-18 | -1.54359 | Cis down vs Nor |
| 2367963 | RABGAP1L | 0.000321762 | 3.92E-18 | -1.44133 | Cis down vs Nor |
| 3632806 | STRA6    | 0.144617    | 4.13E-18 | -1.45278 | Cis down vs Nor |
| 2546409 | ALK      | 0.000330957 | 4.32E-18 | -2.63956 | Cis down vs Nor |
| 3740479 | PRPF8    | 0.0235912   | 4.97E-18 | 1.18616  | Cis up vs Nor   |
| 2627390 | ATXN7    | 0.113656    | 6.48E-18 | -1.13315 | Cis down vs Nor |
| 2648535 | ARHGEF26 | 0.000969757 | 6.81E-18 | -2.22883 | Cis down vs Nor |
| 2532894 | DGKD     | 0.000511735 | 7.24E-18 | -1.85606 | Cis down vs Nor |
| 3267036 | GRK5     | 0.000233714 | 7.60E-18 | -2.58264 | Cis down vs Nor |
| 3957589 | MORC2    | 0.601726    | 8.11E-18 | 1.05074  | Cis up vs Nor   |
| 2448073 | IVNS1ABP | 0.391485    | 8.77E-18 | 1.1299   | Cis up vs Nor   |
| 3522398 | DOCK9    | 0.000959142 | 9.84E-18 | -2.15507 | Cis down vs Nor |
| 2621705 | ATRIP    | 0.00095866  | 1.06E-17 | 1.8127   | Cis up vs Nor   |
| 3340697 | UVRAG    | 2.83E-05    | 1.06E-17 | -3.83005 | Cis down vs Nor |
| 3273601 | IDI1     | 0.0439632   | 1.14E-17 | 1.15483  | Cis up vs Nor   |
| 3581515 | BRF1     | 0.00335334  | 1.16E-17 | -1.58045 | Cis down vs Nor |
| 3817501 | CHAF1A   | 0.1406      | 1.17E-17 | -1.093   | Cis down vs Nor |
| 3714177 | SPECC1   | 0.20349     | 1.46E-17 | 1.14585  | Cis up vs Nor   |
| 2334476 | MAST2    | 0.000467778 | 1.46E-17 | -1.69034 | Cis down vs Nor |
| 2850071 | MYO10    | 0.00181975  | 1.57E-17 | -2.01432 | Cis down vs Nor |
| 3272205 | INPP5A   | 0.000490367 | 1.60E-17 | -2.15732 | Cis down vs Nor |
| 2964553 | BACH2    | 3.24E-05    | 1.60E-17 | -2.33195 | Cis down vs Nor |
| 3340913 | C11orf30 | 0.000230893 | 1.60E-17 | -1.65634 | Cis down vs Nor |
| 2969886 | FYN      | 7.13E-05    | 1.61E-17 | -4.51788 | Cis down vs Nor |
| 3047660 | GLI3     | 0.0025823   | 1.72E-17 | -2.01301 | Cis down vs Nor |
| 3418610 | XRCC6BP1 | 0.00193213  | 1.99E-17 | 1.47046  | Cis up vs Nor   |
| 3694657 | CDH11    | 0.00101833  | 2.01E-17 | -2.90717 | Cis down vs Nor |
| 2595560 | RAPH1    | 0.00410296  | 2.16E-17 | -1.87091 | Cis down vs Nor |
| 2695941 | TOPBP1   | 0.00534835  | 2.18E-17 | -1.46402 | Cis down vs Nor |
| 2958325 | DST      | 0.533318    | 2.26E-17 | -1.04657 | Cis down vs Nor |
| 2520533 | OBFC2A   | 0.840931    | 2.28E-17 | -1.02038 | Cis down vs Nor |
| 3765167 | USP32    | 0.00147679  | 2.35E-17 | -2.40726 | Cis down vs Nor |
| 3381063 | CLPB     | 9.75E-05    | 2.39E-17 | -2.44163 | Cis down vs Nor |
| 3301263 | SORBS1   | 0.00164876  | 2.53E-17 | -1.69636 | Cis down vs Nor |
| 2788366 | ZNF827   | 0.000412267 | 2.68E-17 | -1.76034 | Cis down vs Nor |
| 2922631 | DSE      | 0.264084    | 2.96E-17 | 1.08737  | Cis up vs Nor   |
| 2517588 | OSBPL6   | 0.000236743 | 3.05E-17 | -2.2032  | Cis down vs Nor |
| 2560254 | AUP1     | 0.000683922 | 3.22E-17 | 1.58025  | Cis up vs Nor   |
| 3186491 | PAPPA    | 0.03079     | 3.46E-17 | -1.48376 | Cis down vs Nor |
| 3984945 | ARMCX3   | 0.0043988   | 3.84E-17 | 1.3346   | Cis up vs Nor   |
| 2336099 | OSBPL9   | 0.0241573   | 3.85E-17 | -1.29465 | Cis down vs Nor |
| 3368940 | ABTB2    | 0.000112886 | 3.99E-17 | -1.55235 | Cis down vs Nor |
| 2871821 | TMED7    | 0.00645027  | 4.04E-17 | 1.5687   | Cis up vs Nor   |
| 3453592 | MLL2     | 0.0811162   | 4.11E-17 | 1.33158  | Cis up vs Nor   |
| 3080033 | MLL3     | 0.00019164  | 4.43E-17 | -2.09418 | Cis down vs Nor |
| 2904329 | ANKS1A   | 4.29E-06    | 4.57E-17 | -2.99869 | Cis down vs Nor |
| 3023149 | FLNC     | 0.0104942   | 4.61E-17 | 1.33304  | Cis up vs Nor   |
| 2686023 | DCBLD2   | 0.00433576  | 4.74E-17 | -1.69654 | Cis down vs Nor |
| 2428760 | RSBN1    | 0.0259977   | 4.88E-17 | 1.25942  | Cis up vs Nor   |
| 3400034 | WNK1     | 0.00566873  | 4.95E-17 | -1.67229 | Cis down vs Nor |
| 3956226 | MN1      | 0.0308113   | 5.00E-17 | -1.395   | Cis down vs Nor |
| 3517251 | DACH1    | 0.016406    | 5.06E-17 | -2.61866 | Cis down vs Nor |
| 3367096 | LGR4     | 0.000502972 | 5.15E-17 | -2.94737 | Cis down vs Nor |
| 3139035 | ARFGEF1  | 9.07E-05    | 5.22E-17 | -2.22539 | Cis down vs Nor |
| 2802963 | FBXL7    | 0.00055561  | 5.32E-17 | -1.69432 | Cis down vs Nor |
| 3754469 | ACACA    | 0.00916111  | 5.62E-17 | -1.59605 | Cis down vs Nor |
| 3777991 | KIAA0802 | 0.0519728   | 5.95E-17 | -1.14559 | Cis down vs Nor |
| 3961496 | MKL1     | 0.000458689 | 6.18E-17 | -1.74636 | Cis down vs Nor |
| 2345617 | PKN2     | 0.000521613 | 6.38E-17 | -2.20587 | Cis down vs Nor |
| 2845699 | SLC12A7  | 0.00250595  | 6.89E-17 | -1.4314  | Cis down vs Nor |
| 3603199 | IDH3A    | 0.310512    | 8.04E-17 | 1.11137  | Cis up vs Nor   |
| 2680591 | LRIG1    | 0.000238883 | 8.28E-17 | -2.14755 | Cis down vs Nor |
| 3237088 | STAM     | 0.00365621  | 8.68E-17 | -1.2892  | Cis down vs Nor |
| 3885537 | PLCG1    | 0.0826396   | 8.75E-17 | 1.25849  | Cis up vs Nor   |
| 3187834 | DAB2IP   | 0.00137293  | 8.88E-17 | -1.63246 | Cis down vs Nor |
| 2774971 | ANTXR2   | 0.00138948  | 9.16E-17 | -1.34414 | Cis down vs Nor |
| 4014251 | CHM      | 0.000672112 | 9.39E-17 | -2.30839 | Cis down vs Nor |
| 2530599 | AGFG1    | 0.000813715 | 9.63E-17 | -1.69774 | Cis down vs Nor |
| 3525679 | ANKRD10  | 0.00310863  | 1.00E-16 | 1.92023  | Cis up vs Nor   |
| 3884830 | PPP1R16B | 0.00257361  | 1.02E-16 | -2.20651 | Cis down vs Nor |
| 3999395 | MID1     | 4.15E-05    | 1.17E-16 | -2.92842 | Cis down vs Nor |
| 3598959 | SMAD3    | 1.68E-05    | 1.21E-16 | -2.52977 | Cis down vs Nor |
| 3216319 | ZNF367   | 0.0114728   | 1.27E-16 | 1.83457  | Cis up vs Nor   |
| 3023565 | NRF1     | 0.00293043  | 1.28E-16 | -1.67357 | Cis down vs Nor |
| 2788800 | PRMT10   | 0.31504     | 1.30E-16 | -1.16893 | Cis down vs Nor |
| 2634058 | FAM55C   | 0.661045    | 1.39E-16 | -1.06925 | Cis down vs Nor |
| 3944046 | HMGXB4   | 0.00293874  | 1.45E-16 | -1.8539  | Cis down vs Nor |
| 3185976 | COL27A1  | 0.423319    | 1.56E-16 | -1.0472  | Cis down vs Nor |
| 3606034 | PDE8A    | 0.00179446  | 1.59E-16 | -1.65107 | Cis down vs Nor |
| 3894995 | SNRPB    | 0.124878    | 1.71E-16 | 1.14561  | Cis up vs Nor   |
| 3427820 | SLC25A3  | 0.00172456  | 1.73E-16 | 1.77416  | Cis up vs Nor   |
| 2749699 | RAPGEF2  | 3.35E-05    | 1.87E-16 | -3.43972 | Cis down vs Nor |
| 3742067 | UBE2G1   | 0.000421258 | 1.93E-16 | -2.20849 | Cis down vs Nor |
| 2677723 | ARHGEF3  | 7.51E-06    | 2.11E-16 | -6.75312 | Cis down vs Nor |
| 2545681 | GTF3C2   | 0.000580335 | 2.15E-16 | -1.66397 | Cis down vs Nor |
| 2716025 | RGS12    | 0.0358694   | 2.19E-16 | -1.15702 | Cis down vs Nor |



|         |           |             |          |          |                 |
|---------|-----------|-------------|----------|----------|-----------------|
| 3189422 | FAM125B   | 0.000151859 | 2.57E-16 | -1.81623 | Cis down vs Nor |
| 3927949 | LTN1      | 0.0189202   | 2.62E-16 | -1.28285 | Cis down vs Nor |
| 3908358 | SULF2     | 0.00219757  | 2.74E-16 | -1.55249 | Cis down vs Nor |
| 3524618 | ARGLU1    | 0.054015    | 2.82E-16 | 1.23656  | Cis up vs Nor   |
| 3365360 | HPS5      | 0.44981     | 3.08E-16 | -1.08301 | Cis down vs Nor |
| 3997946 | PRKX      | 0.0001229   | 3.10E-16 | -3.38415 | Cis down vs Nor |
| 3679564 | USP7      | 0.000411685 | 3.22E-16 | -1.54299 | Cis down vs Nor |
| 2477372 | C2orf56   | 0.0060558   | 3.26E-16 | 1.37841  | Cis up vs Nor   |
| 3289235 | SGMS1     | 3.75E-06    | 3.46E-16 | -2.58304 | Cis down vs Nor |
| 3971219 | CNKSR2    | 2.21E-05    | 3.48E-16 | -2.56752 | Cis down vs Nor |
| 3600283 | THSD4     | 0.0251205   | 3.72E-16 | -1.63843 | Cis down vs Nor |
| 3803290 | FAM59A    | 7.20E-05    | 4.39E-16 | -2.33772 | Cis down vs Nor |
| 3974838 | DDX3X     | 0.0415407   | 4.73E-16 | -1.14547 | Cis down vs Nor |
| 2938196 | EXOC2     | 0.000377556 | 4.80E-16 | -1.70443 | Cis down vs Nor |
| 2531779 | ARMC9     | 0.00033129  | 5.07E-16 | -1.55574 | Cis down vs Nor |
| 2932360 | RBM16     | 0.00106144  | 5.65E-16 | -1.52647 | Cis down vs Nor |
| 2722823 | PCDH7     | 0.00540211  | 5.98E-16 | -1.30656 | Cis down vs Nor |
| 3200040 | BNC2      | 0.000283042 | 6.12E-16 | -2.59199 | Cis down vs Nor |
| 3740838 | SMG6      | 0.0874788   | 6.22E-16 | -1.14717 | Cis down vs Nor |
| 2967550 | ATG5      | 0.0015428   | 6.49E-16 | -1.57351 | Cis down vs Nor |
| 3063685 | MCM7      | 0.0127699   | 7.08E-16 | 1.0958   | Cis up vs Nor   |
| 3540091 | ZBTB1     | 0.000633719 | 7.50E-16 | 1.71429  | Cis up vs Nor   |
| 3556990 | JUB       | 0.414969    | 8.06E-16 | -1.06868 | Cis down vs Nor |
| 3291151 | RHOBTB1   | 0.00116778  | 8.12E-16 | -1.34652 | Cis down vs Nor |
| 3773244 | TBC1D16   | 0.000616951 | 8.49E-16 | -1.57838 | Cis down vs Nor |
| 2793221 | NEK1      | 0.00760685  | 9.07E-16 | -1.57354 | Cis down vs Nor |
| 2859601 | ADAMTS6   | 0.601198    | 9.11E-16 | 1.07256  | Cis up vs Nor   |
| 3280787 | C10orf140 | 0.00741179  | 9.13E-16 | 1.60817  | Cis up vs Nor   |
| 2912416 | BAI3      | 0.000822941 | 9.51E-16 | -1.89302 | Cis down vs Nor |
| 3625539 | NEDD4     | 0.0393834   | 9.62E-16 | -1.52078 | Cis down vs Nor |
| 3929325 | SYNJ1     | 0.0849067   | 9.81E-16 | -1.26412 | Cis down vs Nor |
| 2480168 | PRKCE     | 0.000848108 | 1.08E-15 | -2.34525 | Cis down vs Nor |
| 2814527 | BDP1      | 0.156213    | 1.10E-15 | -1.15453 | Cis down vs Nor |
| 2954423 | MRPL2     | 0.0238477   | 1.11E-15 | 1.16897  | Cis up vs Nor   |
| 3242353 | CREM      | 0.000749727 | 1.16E-15 | 1.52737  | Cis up vs Nor   |
| 3228191 | DDX31     | 0.746591    | 1.17E-15 | 1.02391  | Cis up vs Nor   |
| 3234760 | CELF2     | 0.0201865   | 1.19E-15 | -1.62034 | Cis down vs Nor |
| 3472468 | RBM19     | 0.153207    | 1.26E-15 | -1.09469 | Cis down vs Nor |
| 3844978 | SBN02     | 0.00782427  | 1.49E-15 | -1.35436 | Cis down vs Nor |
| 3939183 | BCR       | 0.00524958  | 1.50E-15 | -1.60977 | Cis down vs Nor |
| 3212728 | AGTPBP1   | 0.328542    | 1.58E-15 | 1.07474  | Cis up vs Nor   |
| 3490504 | ALG11     | 0.387037    | 1.60E-15 | -1.12391 | Cis down vs Nor |
| 3886704 | STK4      | 0.326523    | 1.64E-15 | 1.03857  | Cis up vs Nor   |
| 3923354 | AGPAT3    | 0.00725739  | 1.68E-15 | -1.78765 | Cis down vs Nor |
| 3999568 | ARHGAP6   | 0.00626259  | 1.73E-15 | -1.84886 | Cis down vs Nor |
| 3559192 | PRKD1     | 0.000101085 | 1.78E-15 | -2.37024 | Cis down vs Nor |
| 3887635 | NCOA3     | 1.87E-05    | 1.80E-15 | -2.47846 | Cis down vs Nor |
| 2519756 | WDR75     | 0.765705    | 1.89E-15 | 1.029    | Cis up vs Nor   |
| 2717165 | TBC1D14   | 0.000878442 | 1.91E-15 | -1.82105 | Cis down vs Nor |
| 3507710 | SLC7A1    | 0.000525603 | 1.92E-15 | -2.21366 | Cis down vs Nor |
| 2840425 | RANBP17   | 0.916428    | 1.99E-15 | -1.01069 | Cis down vs Nor |
| 3578089 | C14orf49  | 0.00183895  | 2.14E-15 | -1.61323 | Cis down vs Nor |
| 3749086 | AKAP10    | 0.00207199  | 2.14E-15 | -1.70579 | Cis down vs Nor |
| 3457201 | SARNP     | 0.0335589   | 2.18E-15 | -1.15438 | Cis down vs Nor |
| 2813364 | SLC30A5   | 0.0855551   | 2.20E-15 | -1.22671 | Cis down vs Nor |
| 3815278 | ARID3A    | 0.0036883   | 2.26E-15 | -1.51072 | Cis down vs Nor |
| 3360941 | ARFIP2    | 0.0126563   | 2.31E-15 | 1.36318  | Cis up vs Nor   |
| 3542847 | SIPA1L1   | 0.00023917  | 2.32E-15 | -2.38309 | Cis down vs Nor |
| 2620538 | LARS2     | 0.00270978  | 2.33E-15 | -1.87137 | Cis down vs Nor |
| 2532110 | DIS3L2    | 7.78E-06    | 2.52E-15 | -1.98421 | Cis down vs Nor |
| 2648141 | MBNL1     | 0.000277441 | 2.55E-15 | -2.07658 | Cis down vs Nor |
| 3547610 | ZC3H14    | 0.0084291   | 2.60E-15 | -1.25622 | Cis down vs Nor |
| 3300242 | CPEB3     | 0.00160111  | 2.70E-15 | -1.60951 | Cis down vs Nor |
| 2722151 | RBPJ      | 6.45E-05    | 2.74E-15 | -1.69133 | Cis down vs Nor |
| 2459042 | CDC42BPA  | 0.00450172  | 2.76E-15 | -1.60192 | Cis down vs Nor |
| 3009198 | RHBDD2    | 1.67E-05    | 2.83E-15 | 2.40908  | Cis up vs Nor   |
| 2864849 | SSBP2     | 0.000961992 | 2.84E-15 | -3.38302 | Cis down vs Nor |
| 2601544 | CUL3      | 0.000580346 | 2.89E-15 | -1.90982 | Cis down vs Nor |
| 2844709 | CNOT6     | 0.000986741 | 2.97E-15 | -2.17511 | Cis down vs Nor |
| 2927506 | TNFAIP3   | 0.0138685   | 2.99E-15 | -1.56605 | Cis down vs Nor |
| 3496366 | MIR17HG   | 0.0420878   | 3.06E-15 | 1.95464  | Cis up vs Nor   |
| 3776504 | TGIF1     | 0.151836    | 3.20E-15 | 1.15724  | Cis up vs Nor   |
| 3872053 | PEG3      | 0.0190964   | 3.20E-15 | -1.07974 | Cis down vs Nor |
| 3359469 | NAP1L4    | 0.73268     | 3.23E-15 | 1.02004  | Cis up vs Nor   |
| 2794792 | VEGFC     | 0.00116751  | 3.28E-15 | -2.18141 | Cis down vs Nor |
| 3035464 | MAD1L1    | 0.0389297   | 3.28E-15 | -1.13721 | Cis down vs Nor |
| 2952497 | BTBD9     | 0.00047116  | 3.32E-15 | -1.98413 | Cis down vs Nor |
| 3427876 | APAF1     | 0.00188872  | 3.33E-15 | -1.65162 | Cis down vs Nor |
| 3695786 | ACD       | 0.00087235  | 3.43E-15 | 1.59647  | Cis up vs Nor   |
| 3896078 | SLC23A2   | 6.18E-05    | 3.53E-15 | -2.54526 | Cis down vs Nor |
| 3626826 | MYO1E     | 1.72E-05    | 3.83E-15 | -4.14781 | Cis down vs Nor |
| 3439836 | RAD52     | 0.338447    | 3.92E-15 | -1.08856 | Cis down vs Nor |
| 2989537 | GLCCI1    | 0.000653655 | 4.03E-15 | -1.48269 | Cis down vs Nor |
| 2338487 | FGGY      | 0.0012141   | 4.07E-15 | -1.53988 | Cis down vs Nor |
| 3240095 | RAB18     | 0.995406    | 4.12E-15 | -1.00058 | Cis down vs Nor |
| 2835213 | PPARGC1B  | 0.0142262   | 4.18E-15 | -1.34262 | Cis down vs Nor |

|         |          |             |          |          |                 |
|---------|----------|-------------|----------|----------|-----------------|
| 2935475 | QKI      | 0.000350502 | 4.23E-15 | -2.23223 | Cis down vs Nor |
| 3960133 | CARD10   | 0.0389228   | 4.33E-15 | -1.28101 | Cis down vs Nor |
| 2486178 | MEIS1    | 0.000330526 | 4.48E-15 | -3.40401 | Cis down vs Nor |
| 3190463 | ODF2     | 0.0371398   | 4.51E-15 | 1.12008  | Cis up vs Nor   |
| 2549092 | SOS1     | 0.00162308  | 4.54E-15 | -1.95028 | Cis down vs Nor |
| 2825514 | DMXL1    | 0.000497872 | 4.96E-15 | -2.1637  | Cis down vs Nor |
| 2655476 | AP2M1    | 0.00370181  | 5.40E-15 | 1.64325  | Cis up vs Nor   |
| 3517594 | DIS3     | 0.000249447 | 5.44E-15 | 2.12525  | Cis up vs Nor   |
| 3960629 | DDX17    | 0.0164563   | 5.72E-15 | -1.366   | Cis down vs Nor |
| 3362719 | EIF4G2   | 0.000985038 | 6.10E-15 | 1.32639  | Cis up vs Nor   |
| 3893910 | TCEA2    | 0.00131798  | 6.17E-15 | 1.86501  | Cis up vs Nor   |
| 2655387 | EIF2B5   | 9.81E-05    | 6.22E-15 | 1.58484  | Cis up vs Nor   |
| 3615985 | MTMR10   | 0.00995712  | 6.68E-15 | -1.20671 | Cis down vs Nor |
| 3611126 | MEF2A    | 0.000794656 | 6.81E-15 | -1.74064 | Cis down vs Nor |
| 3653317 | RBBP6    | 0.00112702  | 6.83E-15 | 2.27999  | Cis up vs Nor   |
| 3223157 | DBC1     | 0.000145295 | 7.65E-15 | -4.20918 | Cis down vs Nor |
| 2412529 | NRD1     | 0.0775317   | 7.74E-15 | 1.18539  | Cis up vs Nor   |
| 3176209 | TLE4     | 5.65E-06    | 7.76E-15 | -3.7336  | Cis down vs Nor |
| 3223646 | PSMD5    | 0.915838    | 7.90E-15 | 1.00883  | Cis up vs Nor   |
| 3129588 | KIF13B   | 0.000981441 | 8.17E-15 | -1.4428  | Cis down vs Nor |
| 2608469 | ITPR1    | 0.000249951 | 8.30E-15 | -1.72355 | Cis down vs Nor |
| 4004044 | DMD      | 0.0218606   | 8.95E-15 | -1.31378 | Cis down vs Nor |
| 3629698 | DPP8     | 0.162929    | 9.02E-15 | -1.1133  | Cis down vs Nor |
| 3723071 | DBF4B    | 0.0976608   | 9.08E-15 | -1.1273  | Cis down vs Nor |
| 2972063 | C6orf170 | 0.0370703   | 9.37E-15 | -1.56265 | Cis down vs Nor |
| 3298738 | WAPAL    | 0.000146619 | 9.90E-15 | -2.07393 | Cis down vs Nor |
| 3671727 | ATP2C2   | 0.400587    | 1.06E-14 | -1.06729 | Cis down vs Nor |
| 3147321 | UBR5     | 9.72E-05    | 1.09E-14 | -1.77236 | Cis down vs Nor |
| 2745899 | HHIP     | 0.0246346   | 1.11E-14 | -1.91302 | Cis down vs Nor |
| 3908631 | PREX1    | 0.0102103   | 1.13E-14 | -1.55119 | Cis down vs Nor |
| 2628785 | MITF     | 0.00122698  | 1.16E-14 | -1.64168 | Cis down vs Nor |
| 2437417 | ASH1L    | 0.000885865 | 1.20E-14 | -1.63985 | Cis down vs Nor |
| 3139722 | NCOA2    | 6.13E-05    | 1.26E-14 | -2.87221 | Cis down vs Nor |
| 2973694 | ARHGAP18 | 0.000988241 | 1.28E-14 | -2.96055 | Cis down vs Nor |
| 2619120 | TRAK1    | 0.000115093 | 1.41E-14 | -1.98736 | Cis down vs Nor |
| 2484970 | EHBP1    | 0.000962579 | 1.42E-14 | -2.53074 | Cis down vs Nor |
| 2381177 | MARK1    | 0.00232619  | 1.45E-14 | -1.41644 | Cis down vs Nor |
| 2379132 | ATF3     | 0.000248489 | 1.46E-14 | 3.48667  | Cis up vs Nor   |
| 2688759 | ATG3     | 0.690554    | 1.49E-14 | -1.03457 | Cis down vs Nor |
| 2364231 | DDR2     | 0.000231718 | 1.54E-14 | -1.82098 | Cis down vs Nor |
| 3532393 | KIAA0391 | 0.00201778  | 1.73E-14 | -1.69098 | Cis down vs Nor |
| 3904119 | CPNE1    | 0.068704    | 1.73E-14 | 1.07915  | Cis up vs Nor   |
| 3836266 | FOSB     | 0.00177215  | 1.85E-14 | 2.8371   | Cis up vs Nor   |
| 2346934 | MTF2     | 0.00238281  | 1.94E-14 | -1.75196 | Cis down vs Nor |
| 2417791 | ANKRD13C | 0.00456275  | 2.01E-14 | -1.613   | Cis down vs Nor |
| 2579439 | GTDC1    | 0.00849541  | 2.06E-14 | -1.91271 | Cis down vs Nor |
| 2746119 | SMAD1    | 0.00776     | 2.09E-14 | -1.44193 | Cis down vs Nor |
| 3670772 | CMIP     | 0.00633803  | 2.19E-14 | -1.87474 | Cis down vs Nor |
| 3979912 | AR       | 8.12E-05    | 2.30E-14 | -1.70437 | Cis down vs Nor |
| 3929664 | TMEM50B  | 0.137428    | 2.31E-14 | 1.07738  | Cis up vs Nor   |
| 2675628 | VPRBP    | 3.97E-06    | 2.41E-14 | -2.44346 | Cis down vs Nor |
| 2584787 | COBLL1   | 0.00258343  | 2.42E-14 | -1.82186 | Cis down vs Nor |
| 2556752 | SPRED2   | 2.21E-05    | 2.68E-14 | -2.67497 | Cis down vs Nor |
| 3258221 | HHEX     | 5.54E-05    | 2.70E-14 | 3.62491  | Cis up vs Nor   |
| 3418007 | SHMT2    | 0.000533935 | 2.73E-14 | 1.20926  | Cis up vs Nor   |
| 3296386 | DLG5     | 0.000623668 | 2.90E-14 | -1.52808 | Cis down vs Nor |
| 3131881 | PPAPDC1B | 3.05E-05    | 3.02E-14 | 2.86218  | Cis up vs Nor   |
| 3512294 | TSC22D1  | 0.00115811  | 3.02E-14 | 1.60564  | Cis up vs Nor   |
| 3917938 | HUNK     | 0.00058614  | 3.03E-14 | -3.67486 | Cis down vs Nor |
| 3072368 | ZC3HC1   | 0.00522496  | 3.08E-14 | -1.22249 | Cis down vs Nor |
| 2817731 | ZFYVE16  | 0.00908794  | 3.15E-14 | -1.63242 | Cis down vs Nor |
| 3880191 | GZF1     | 8.13E-05    | 3.18E-14 | 2.49046  | Cis up vs Nor   |
| 3179872 | FAM120A  | 0.0879676   | 3.31E-14 | -1.13478 | Cis down vs Nor |
| 3526831 | RASA3    | 0.000294719 | 3.41E-14 | -2.25984 | Cis down vs Nor |
| 3396770 | CDON     | 0.00105686  | 3.43E-14 | -1.6938  | Cis down vs Nor |
| 3106243 | RIPK2    | 0.980757    | 3.43E-14 | 1.00217  | Cis up vs Nor   |
| 3453882 | MCRS1    | 0.0135932   | 3.47E-14 | -1.32665 | Cis down vs Nor |
| 2663396 | IQSEC1   | 0.0106697   | 3.52E-14 | -1.34044 | Cis down vs Nor |
| 2775463 | HNRNPD   | 0.00180957  | 3.55E-14 | -1.18988 | Cis down vs Nor |
| 3227696 | RAPGEF1  | 0.0294215   | 3.74E-14 | -1.37773 | Cis down vs Nor |
| 3709244 | CHD3     | 0.0019587   | 3.78E-14 | 1.36252  | Cis up vs Nor   |
| 3010030 | RSBN1L   | 0.000108138 | 3.80E-14 | -2.91003 | Cis down vs Nor |
| 2587937 | CHRNA1   | 0.241588    | 3.85E-14 | 1.06303  | Cis up vs Nor   |
| 3408018 | ETNK1    | 0.0204309   | 3.89E-14 | 1.33757  | Cis up vs Nor   |
| 2901660 | PRR3     | 0.10129     | 3.94E-14 | -1.0666  | Cis down vs Nor |
| 3646434 | UBN1     | 0.00302776  | 4.03E-14 | 1.41961  | Cis up vs Nor   |
| 3860737 | ZNF585A  | 0.0269185   | 4.06E-14 | 1.29543  | Cis up vs Nor   |
| 3774635 | FASN     | 0.220882    | 4.17E-14 | 1.27473  | Cis up vs Nor   |
| 2319881 | PEX14    | 5.39E-05    | 4.32E-14 | -2.13883 | Cis down vs Nor |
| 2549565 | SLC8A1   | 0.000576239 | 4.35E-14 | -2.02308 | Cis down vs Nor |
| 3686164 | GTF3C1   | 0.000360719 | 4.38E-14 | -1.3538  | Cis down vs Nor |
| 4004878 | RPGR     | 0.00422994  | 5.00E-14 | -1.86637 | Cis down vs Nor |
| 2624074 | GNL3     | 0.0296351   | 5.17E-14 | 1.19194  | Cis up vs Nor   |
| 2759582 | AFAP1    | 1.03E-05    | 5.19E-14 | -2.14471 | Cis down vs Nor |
| 3371986 | NUP160   | 0.000133404 | 5.19E-14 | 1.77239  | Cis up vs Nor   |
| 3537164 | PELI2    | 0.0119068   | 5.24E-14 | -1.91515 | Cis down vs Nor |

|         |          |             |          |          |                 |
|---------|----------|-------------|----------|----------|-----------------|
| 3331730 | ZFP91    | 0.0124226   | 5.62E-14 | -1.21731 | Cis down vs Nor |
| 2887048 | STK10    | 9.03E-05    | 5.69E-14 | -1.81387 | Cis down vs Nor |
| 2481142 | MSH6     | 0.0563166   | 5.94E-14 | -1.23342 | Cis down vs Nor |
| 3238231 | MLLT10   | 0.000123959 | 5.97E-14 | -3.55223 | Cis down vs Nor |
| 3311775 | DHX32    | 0.00489067  | 5.98E-14 | -1.53811 | Cis down vs Nor |
| 2812435 | ERBB2IP  | 0.000830162 | 6.15E-14 | -2.13397 | Cis down vs Nor |
| 2766893 | APBB2    | 0.000710343 | 6.30E-14 | -3.21724 | Cis down vs Nor |
| 3772525 | CYTH1    | 2.73E-05    | 6.64E-14 | -2.22354 | Cis down vs Nor |
| 3994846 | MTMR1    | 0.0120433   | 6.75E-14 | -1.25954 | Cis down vs Nor |
| 2470165 | TRIB2    | 0.0107643   | 7.47E-14 | -1.70965 | Cis down vs Nor |
| 3147286 | RRM2B    | 0.0325954   | 7.51E-14 | 1.32723  | Cis up vs Nor   |
| 2895159 | HIVEP1   | 0.00540475  | 7.75E-14 | -1.59518 | Cis down vs Nor |
| 2691575 | POLQ     | 0.236285    | 7.97E-14 | -1.13687 | Cis down vs Nor |
| 3890180 | CASS4    | 0.0549225   | 8.01E-14 | 1.22724  | Cis up vs Nor   |
| 3821015 | LDLR     | 0.0010186   | 8.10E-14 | -1.85188 | Cis down vs Nor |
| 2615360 | TGFBR2   | 0.00103384  | 8.77E-14 | -2.61836 | Cis down vs Nor |
| 3518086 | TBC1D4   | 0.000653218 | 9.51E-14 | -1.93553 | Cis down vs Nor |
| 2643901 | PPP2R3A  | 0.00180444  | 9.69E-14 | -1.70485 | Cis down vs Nor |
| 3696571 | TERF2    | 0.00427893  | 1.02E-13 | 1.52373  | Cis up vs Nor   |
| 3736390 | PGS1     | 0.000977747 | 1.07E-13 | -1.74049 | Cis down vs Nor |
| 3509910 | FAM48A   | 0.00179554  | 1.10E-13 | -1.44056 | Cis down vs Nor |
| 2594627 | FAM126B  | 0.0207177   | 1.12E-13 | -1.58515 | Cis down vs Nor |
| 2436826 | KCNN3    | 0.000264023 | 1.13E-13 | -1.99621 | Cis down vs Nor |
| 3491948 | TDRD3    | 0.469102    | 1.15E-13 | -1.02471 | Cis down vs Nor |
| 3568184 | ESR2     | 0.0492004   | 1.16E-13 | -1.23867 | Cis down vs Nor |
| 2698738 | XRN1     | 0.00369339  | 1.21E-13 | -1.72062 | Cis down vs Nor |
| 2566764 | REV1     | 0.000749775 | 1.22E-13 | -1.79309 | Cis down vs Nor |
| 3765642 | INTS2    | 0.00220003  | 1.25E-13 | -1.87632 | Cis down vs Nor |
| 3707258 | MINK1    | 0.0352525   | 1.31E-13 | -1.28134 | Cis down vs Nor |
| 2681753 | FOXP1    | 0.00508435  | 1.37E-13 | -1.87182 | Cis down vs Nor |
| 3642060 | CHSY1    | 0.0574697   | 1.40E-13 | -1.27819 | Cis down vs Nor |
| 3932148 | BRWD1    | 0.00251156  | 1.40E-13 | -1.44269 | Cis down vs Nor |
| 3150844 | SNTB1    | 0.00570015  | 1.45E-13 | -1.75513 | Cis down vs Nor |
| 2385258 | C1orf124 | 0.00406731  | 1.47E-13 | 1.59799  | Cis up vs Nor   |
| 2431886 | PDE4DIP  | 0.0270423   | 1.47E-13 | -1.21352 | Cis down vs Nor |
| 2734784 | AFF1     | 0.037926    | 1.48E-13 | -1.13738 | Cis down vs Nor |
| 3035892 | GNA12    | 8.98E-06    | 1.53E-13 | -2.28204 | Cis down vs Nor |
| 2897635 | CDKAL1   | 0.00347395  | 1.53E-13 | -1.81587 | Cis down vs Nor |
| 4007617 | PIM2     | 0.000350104 | 1.57E-13 | 2.71662  | Cis up vs Nor   |
| 3201488 | CDKN2B   | 0.000100808 | 1.58E-13 | 2.43972  | Cis up vs Nor   |
| 2617276 | CTDSPL   | 6.70E-05    | 1.60E-13 | -1.76931 | Cis down vs Nor |
| 3023384 | AHCYL2   | 0.00165683  | 1.61E-13 | -1.39423 | Cis down vs Nor |
| 3279410 | FAM188A  | 0.00771208  | 1.61E-13 | -1.55828 | Cis down vs Nor |
| 2925237 | LAMA2    | 0.0413963   | 1.71E-13 | 1.10225  | Cis up vs Nor   |
| 2366490 | BLZF1    | 0.727991    | 1.72E-13 | 1.03772  | Cis up vs Nor   |
| 3475679 | ZCCHC8   | 0.0297945   | 1.72E-13 | -1.28628 | Cis down vs Nor |
| 3952825 | C22orf29 | 0.0402299   | 1.79E-13 | 1.22455  | Cis up vs Nor   |
| 2761734 | FBXL5    | 0.0583851   | 1.85E-13 | -1.14743 | Cis down vs Nor |
| 3470253 | SART3    | 0.110909    | 2.00E-13 | 1.13607  | Cis up vs Nor   |
| 3521174 | ABCC4    | 0.00113927  | 2.00E-13 | -1.67716 | Cis down vs Nor |
| 3719112 | ZNHIT3   | 0.000156597 | 2.01E-13 | 1.65798  | Cis up vs Nor   |
| 3220384 | LPAR1    | 0.0101802   | 2.05E-13 | -1.54257 | Cis down vs Nor |
| 3631794 | MYO9A    | 0.000598772 | 2.15E-13 | -2.11892 | Cis down vs Nor |
| 2934089 | WTAP     | 0.00102596  | 2.15E-13 | 1.35678  | Cis up vs Nor   |
| 2545869 | IFT172   | 0.0483962   | 2.20E-13 | -1.11554 | Cis down vs Nor |
| 3553141 | TECPR2   | 0.000467139 | 2.22E-13 | -1.52946 | Cis down vs Nor |
| 2816298 | IQGAP2   | 0.00849803  | 2.27E-13 | -1.17693 | Cis down vs Nor |
| 2926323 | EYA4     | 0.000142945 | 2.27E-13 | -2.36398 | Cis down vs Nor |
| 3952637 | HIRA     | 5.05E-05    | 2.42E-13 | -1.6651  | Cis down vs Nor |
| 3078493 | ZNF425   | 9.58E-07    | 2.44E-13 | 7.15594  | Cis up vs Nor   |
| 3789442 | WDR7     | 0.000342564 | 2.53E-13 | -1.75917 | Cis down vs Nor |
| 3564071 | NIN      | 0.0279884   | 2.55E-13 | -1.22607 | Cis down vs Nor |
| 3381925 | PGM2L1   | 0.317184    | 2.56E-13 | -1.07276 | Cis down vs Nor |
| 4021633 | ENOX2    | 0.000473735 | 2.73E-13 | -3.16348 | Cis down vs Nor |
| 3747657 | FLCN     | 0.679199    | 2.81E-13 | -1.06317 | Cis down vs Nor |
| 2583014 | BAZ2B    | 7.76E-05    | 2.83E-13 | -2.66658 | Cis down vs Nor |
| 2317317 | TP73     | 0.060864    | 2.93E-13 | -1.22795 | Cis down vs Nor |
| 3063083 | SMURF1   | 1.74E-05    | 2.94E-13 | -2.52522 | Cis down vs Nor |
| 3035682 | FTSJ2    | 5.56E-05    | 3.06E-13 | 1.89949  | Cis up vs Nor   |
| 2742134 | SPATA5   | 0.00371605  | 3.18E-13 | -1.42123 | Cis down vs Nor |
| 2319661 | KIF1B    | 8.08E-05    | 3.27E-13 | -1.80835 | Cis down vs Nor |
| 2571979 | SLC35F5  | 0.138903    | 3.27E-13 | -1.20008 | Cis down vs Nor |
| 3637818 | NTRK3    | 0.00526751  | 3.36E-13 | -1.37459 | Cis down vs Nor |
| 3998247 | NLGN4X   | 0.00202571  | 3.45E-13 | -2.61201 | Cis down vs Nor |
| 3575567 | FOXN3    | 0.000594428 | 3.50E-13 | -4.07766 | Cis down vs Nor |
| 3337067 | RPS6KB2  | 0.000661299 | 3.51E-13 | 2.02278  | Cis up vs Nor   |
| 2793137 | SH3RF1   | 0.000197883 | 3.52E-13 | -1.95247 | Cis down vs Nor |
| 3076076 | SLC37A3  | 0.00779528  | 3.79E-13 | -1.71331 | Cis down vs Nor |
| 2461786 | ARID4B   | 0.000133326 | 3.83E-13 | -3.28383 | Cis down vs Nor |
| 2544662 | DNMT3A   | 0.00131959  | 3.88E-13 | -1.4003  | Cis down vs Nor |
| 3576545 | SMEK1    | 0.00265912  | 3.94E-13 | -1.37259 | Cis down vs Nor |
| 3751237 | SEZ6     | 0.00881227  | 3.96E-13 | -1.5429  | Cis down vs Nor |
| 2609560 | THUMPD3  | 0.14664     | 3.97E-13 | -1.15956 | Cis down vs Nor |
| 3434525 | MLEC     | 0.000203371 | 4.09E-13 | 1.76858  | Cis up vs Nor   |
| 3764103 | SRSF1    | 0.484361    | 4.11E-13 | 1.03169  | Cis up vs Nor   |
| 2598099 | BARD1    | 0.149103    | 4.19E-13 | -1.14412 | Cis down vs Nor |

|         |              |             |          |          |                 |
|---------|--------------|-------------|----------|----------|-----------------|
| 3943101 | DEPDC5       | 0.00247938  | 4.20E-13 | -1.64088 | Cis down vs Nor |
| 3020496 | ST7          | 0.000601425 | 4.20E-13 | -2.2175  | Cis down vs Nor |
| 2463482 | OPN3         | 0.000116502 | 4.22E-13 | 2.48858  | Cis up vs Nor   |
| 3452323 | SLC38A2      | 0.0150333   | 4.48E-13 | -1.34566 | Cis down vs Nor |
| 3685329 | PALB2        | 0.0143011   | 4.50E-13 | 1.26287  | Cis up vs Nor   |
| 3203753 | UBAP2        | 0.00709205  | 4.53E-13 | -1.30318 | Cis down vs Nor |
| 2666904 | SLC4A7       | 0.433476    | 4.74E-13 | -1.07487 | Cis down vs Nor |
| 3205659 | SHB          | 0.009705    | 4.96E-13 | -1.61746 | Cis down vs Nor |
| 2626802 | PTPRG        | 0.00134208  | 5.03E-13 | -1.6145  | Cis down vs Nor |
| 2551327 | SRBD1        | 0.00797271  | 5.14E-13 | -1.71656 | Cis down vs Nor |
| 3180342 | C9orf3       | 0.00134295  | 5.38E-13 | -1.43779 | Cis down vs Nor |
| 3262198 | PDCD11       | 0.612009    | 5.69E-13 | -1.03315 | Cis down vs Nor |
| 3125915 | MTUS1        | 0.0326159   | 5.70E-13 | -1.43427 | Cis down vs Nor |
| 3768015 | HELZ         | 0.000975198 | 5.82E-13 | -1.54471 | Cis down vs Nor |
| 3923257 | PDXK         | 0.128058    | 6.13E-13 | -1.10826 | Cis down vs Nor |
| 3573078 | VIPAR        | 0.409767    | 6.15E-13 | -1.05441 | Cis down vs Nor |
| 3457824 | TIMELESS     | 0.002956    | 6.29E-13 | 1.28972  | Cis up vs Nor   |
| 2434925 | PI4KB        | 0.0227531   | 6.33E-13 | -1.1159  | Cis down vs Nor |
| 3390067 | NPAT         | 0.000522608 | 6.72E-13 | -1.87302 | Cis down vs Nor |
| 2774817 | PAQR3        | 0.00168346  | 6.91E-13 | 1.53569  | Cis up vs Nor   |
| 3722917 | GRN          | 0.00637828  | 7.19E-13 | 1.5135   | Cis up vs Nor   |
| 2912649 | COL19A1      | 0.163683    | 7.24E-13 | -1.23217 | Cis down vs Nor |
| 3980643 | DLG3         | 0.000290181 | 7.27E-13 | -1.34702 | Cis down vs Nor |
| 2727976 | CEP135       | 0.0141692   | 7.35E-13 | -1.3482  | Cis down vs Nor |
| 3427352 | NEDD1        | 0.904887    | 7.55E-13 | 1.01847  | Cis up vs Nor   |
| 3759186 | GPATCH8      | 5.30E-06    | 7.82E-13 | -1.86582 | Cis down vs Nor |
| 3014411 | TRRAP        | 0.129876    | 8.02E-13 | -1.09755 | Cis down vs Nor |
| 2971801 | MAN1A1       | 0.0497538   | 8.08E-13 | -1.26443 | Cis down vs Nor |
| 2982319 | SOD2         | 9.32E-06    | 8.14E-13 | 4.10009  | Cis up vs Nor   |
| 3401119 | ITFG2        | 0.0180325   | 8.14E-13 | 1.19077  | Cis up vs Nor   |
| 3796335 | LPIN2        | 0.0205356   | 8.52E-13 | -1.20157 | Cis down vs Nor |
| 2488252 | DYSF         | 0.192344    | 8.66E-13 | 1.20172  | Cis up vs Nor   |
| 3422326 | TBC1D15      | 0.0088803   | 8.93E-13 | -1.5589  | Cis down vs Nor |
| 3391093 | ALG9         | 0.447498    | 9.08E-13 | -1.05388 | Cis down vs Nor |
| 3845495 | REXO1        | 0.630095    | 9.11E-13 | 1.05197  | Cis up vs Nor   |
| 2654394 | FXR1         | 0.0506406   | 9.30E-13 | -1.19588 | Cis down vs Nor |
| 2536298 | 2-Sep        | 0.00125146  | 9.35E-13 | 1.30744  | Cis up vs Nor   |
| 2423422 | BCAR3        | 1.81E-05    | 9.35E-13 | -2.66891 | Cis down vs Nor |
| 2635641 | PVRL3        | 0.0547879   | 9.44E-13 | -1.68008 | Cis down vs Nor |
| 2699564 | PLOD2        | 0.00313606  | 9.50E-13 | 1.47929  | Cis up vs Nor   |
| 2864449 | SERINC5      | 0.0102031   | 9.53E-13 | -1.36617 | Cis down vs Nor |
| 3559497 | STRN3        | 0.00190969  | 9.55E-13 | -2.10774 | Cis down vs Nor |
| 2984275 | PDE10A       | 0.000258038 | 9.74E-13 | -1.65282 | Cis down vs Nor |
| 3069955 | TSPAN12      | 0.0219464   | 9.79E-13 | -1.32256 | Cis down vs Nor |
| 3755655 | FBXL20       | 0.000462733 | 9.97E-13 | -1.89104 | Cis down vs Nor |
| 3398145 | PRDM10       | 0.000103503 | 1.04E-12 | -1.4617  | Cis down vs Nor |
| 3540552 | FUT8         | 0.00600942  | 1.09E-12 | -2.27957 | Cis down vs Nor |
| 2326496 | DHDDS        | 0.170139    | 1.09E-12 | -1.10046 | Cis down vs Nor |
| 2400518 | ECE1         | 0.0163268   | 1.13E-12 | -1.43254 | Cis down vs Nor |
| 3325907 | HIPK3        | 0.00578882  | 1.15E-12 | -1.33569 | Cis down vs Nor |
| 2634027 | CEP97        | 0.666337    | 1.16E-12 | -1.05754 | Cis down vs Nor |
| 3536786 | FBXO34       | 0.000302147 | 1.21E-12 | -2.05658 | Cis down vs Nor |
| 3041875 | OSBPL3       | 0.00606086  | 1.22E-12 | -1.84691 | Cis down vs Nor |
| 3401828 | DYRK4        | 0.00105092  | 1.24E-12 | 2.92477  | Cis up vs Nor   |
| 2476075 | SPAST        | 0.00191531  | 1.28E-12 | -1.84435 | Cis down vs Nor |
| 3362468 | SBF2         | 0.00031667  | 1.33E-12 | -2.81737 | Cis down vs Nor |
| 3168700 | ZCCHC7       | 0.407657    | 1.35E-12 | 1.03793  | Cis up vs Nor   |
| 3704376 | FAM38A       | 0.923003    | 1.40E-12 | 1.0127   | Cis up vs Nor   |
| 2348896 | CDC14A       | 0.000213253 | 1.41E-12 | -1.67417 | Cis down vs Nor |
| 3260099 | C10orf28     | 0.00376426  | 1.44E-12 | -1.27956 | Cis down vs Nor |
| 2645275 | SLC25A36     | 0.632104    | 1.51E-12 | 1.04041  | Cis up vs Nor   |
| 3845365 | TCF3         | 0.23702     | 1.51E-12 | -1.10972 | Cis down vs Nor |
| 2565592 | SEMA4C       | 0.0140136   | 1.58E-12 | 1.38106  | Cis up vs Nor   |
| 3375245 | DBB1         | 0.1729      | 1.61E-12 | 1.08421  | Cis up vs Nor   |
| 2343170 | CCDC55       | 0.00662299  | 1.61E-12 | -1.7896  | Cis down vs Nor |
| 3945877 | SMCR7L       | 0.000297501 | 1.68E-12 | 1.45501  | Cis up vs Nor   |
| 3633890 | SCAPER       | 3.39E-05    | 1.68E-12 | -1.99481 | Cis down vs Nor |
| 2586603 | TLK1         | 0.000218384 | 1.70E-12 | -2.64835 | Cis down vs Nor |
| 3623771 | TRPM7        | 0.0103835   | 1.70E-12 | -1.3474  | Cis down vs Nor |
| 3261765 | SUFU         | 5.30E-05    | 1.72E-12 | -1.48371 | Cis down vs Nor |
| 3194635 | C9orf86      | 0.0233307   | 1.74E-12 | 1.32859  | Cis up vs Nor   |
| 3773174 | CBX4         | 2.78E-05    | 1.85E-12 | 2.11383  | Cis up vs Nor   |
| 2956052 | TNFRSF21     | 0.00842213  | 1.96E-12 | -1.22077 | Cis down vs Nor |
| 3421300 | MDM2         | 0.00192871  | 2.02E-12 | -1.57962 | Cis down vs Nor |
| 3915087 | USP25        | 0.0012032   | 2.04E-12 | -1.63567 | Cis down vs Nor |
| 3397877 | ARHGAP32     | 0.00103746  | 2.06E-12 | -2.12287 | Cis down vs Nor |
| 3261492 | NOLC1        | 0.000157828 | 2.10E-12 | 1.81505  | Cis up vs Nor   |
| 2601995 | IRS1         | 0.000222811 | 2.17E-12 | -1.83654 | Cis down vs Nor |
| 2612175 | NR2C2        | 0.00561652  | 2.19E-12 | -1.58646 | Cis down vs Nor |
| 4019849 | LAMP2        | 0.0122698   | 2.25E-12 | 1.55742  | Cis up vs Nor   |
| 3371673 | ARHGAP1      | 6.14E-05    | 2.31E-12 | 1.47777  | Cis up vs Nor   |
| 2797393 | FAT1         | 0.0590087   | 2.35E-12 | -1.20193 | Cis down vs Nor |
| 2510713 | FMNL2        | 0.000304462 | 2.36E-12 | -2.21853 | Cis down vs Nor |
| 3948259 | PRR5-ARHGAP8 | 0.0682706   | 2.44E-12 | -1.3181  | Cis down vs Nor |
| 3199207 | NFIB         | 0.00135466  | 2.46E-12 | -1.33382 | Cis down vs Nor |
| 3448152 | ITPR2        | 0.0111367   | 2.47E-12 | -1.37502 | Cis down vs Nor |

|         |          |             |          |          |                 |
|---------|----------|-------------|----------|----------|-----------------|
| 3252382 | MYST4    | 0.000155299 | 2.52E-12 | -3.06791 | Cis down vs Nor |
| 3591674 | C15orf63 | 0.000663403 | 2.54E-12 | 3.53211  | Cis up vs Nor   |
| 3906062 | ZHX3     | 0.00359708  | 2.55E-12 | -1.63612 | Cis down vs Nor |
| 3488602 | LRCH1    | 1.44E-05    | 2.55E-12 | -2.58557 | Cis down vs Nor |
| 3377044 | SF1      | 0.484175    | 2.59E-12 | 1.10737  | Cis up vs Nor   |
| 3970642 | CDKL5    | 0.000322346 | 2.65E-12 | -2.18861 | Cis down vs Nor |
| 2989493 | MIOS     | 0.70801     | 2.66E-12 | -1.03715 | Cis down vs Nor |
| 3599280 | SKOR1    | 5.55E-05    | 2.72E-12 | -2.03525 | Cis down vs Nor |
| 3185643 | RGS3     | 0.274467    | 2.78E-12 | -1.07906 | Cis down vs Nor |
| 3255220 | GHITM    | 0.00123603  | 2.89E-12 | 1.7158   | Cis up vs Nor   |
| 2369110 | RASAL2   | 8.54E-05    | 2.99E-12 | -2.92316 | Cis down vs Nor |
| 2833286 | ARHGAP26 | 0.00116053  | 3.12E-12 | -1.88868 | Cis down vs Nor |
| 3931112 | HLCS     | 0.000125994 | 3.16E-12 | -1.52724 | Cis down vs Nor |
| 2565410 | KIAA1310 | 0.0140575   | 3.17E-12 | 1.40865  | Cis up vs Nor   |
| 3526378 | PCID2    | 0.0978902   | 3.23E-12 | 1.12958  | Cis up vs Nor   |

**Supplementary table S3B: Genes showing differential expression only between normal and cisplatin treated conditions**

| Transcript ID | Gene Symbol | p-value(Condition) | Fold-Change(Cis vs. Nor) | Fold-Change(Cis vs. Nor) (Description) |
|---------------|-------------|--------------------|--------------------------|----------------------------------------|
| 3995804       | SLC6A8      | 4.14E-07           | 2.06006                  | Cis up vs Nor                          |
| 3790704       | PMAIP1      | 7.37E-07           | 10.7091                  | Cis up vs Nor                          |
| 2910680       | LRRC1       | 7.44E-07           | -2.03935                 | Cis down vs Nor                        |
| 3078493       | ZNF425      | 9.58E-07           | 7.15594                  | Cis up vs Nor                          |
| 2892979       | CDYL        | 1.26E-06           | -2.49978                 | Cis down vs Nor                        |
| 3417345       | RPL41       | 2.22E-06           | 8.68572                  | Cis up vs Nor                          |
| 3180717       | C9orf102    | 2.38E-06           | -2.82613                 | Cis down vs Nor                        |
| 2871923       | ATG12       | 2.61E-06           | 2.66119                  | Cis up vs Nor                          |
| 2509740       | MBD5        | 2.83E-06           | -2.1173                  | Cis down vs Nor                        |
| 3497586       | MBNL2       | 3.08E-06           | -3.43637                 | Cis down vs Nor                        |
| 3407096       | PLEKHA5     | 3.68E-06           | -3.08649                 | Cis down vs Nor                        |
| 3858285       | TSHZ3       | 3.70E-06           | -7.29248                 | Cis down vs Nor                        |
| 3590239       | DLL4        | 3.70E-06           | 2.64509                  | Cis up vs Nor                          |
| 2675628       | VPRBP       | 3.97E-06           | -2.44346                 | Cis down vs Nor                        |
| 2904329       | ANKS1A      | 4.29E-06           | -2.99869                 | Cis down vs Nor                        |
| 2734421       | ARHGAP24    | 4.30E-06           | -4.06694                 | Cis down vs Nor                        |
| 3928070       | CCT8        | 5.17E-06           | 2.18587                  | Cis up vs Nor                          |
| 3501661       | ARHGEF7     | 5.26E-06           | -2.63583                 | Cis down vs Nor                        |
| 3544525       | FOS         | 5.31E-06           | 9.07849                  | Cis up vs Nor                          |
| 2903343       | BRD2        | 5.46E-06           | 2.12622                  | Cis up vs Nor                          |
| 2900091       | HIST1H2AL   | 5.60E-06           | -2.89326                 | Cis down vs Nor                        |
| 3176209       | TLE4        | 5.65E-06           | -3.73361                 | Cis down vs Nor                        |
| 3757970       | PSMC3IP     | 5.68E-06           | 2.72188                  | Cis up vs Nor                          |
| 3807474       | C18orf32    | 6.18E-06           | 4.13326                  | Cis up vs Nor                          |
| 3289235       | SGMS1       | 6.41E-06           | -2.42717                 | Cis down vs Nor                        |
| 2330687       | ZC3H12A     | 6.43E-06           | 2.28872                  | Cis up vs Nor                          |
| 3099566       | FAM110B     | 6.49E-06           | -4.90272                 | Cis down vs Nor                        |
| 3108859       | OSR2        | 6.55E-06           | 2.28594                  | Cis up vs Nor                          |
| 3571347       | NUMB        | 6.96E-06           | -2.80428                 | Cis down vs Nor                        |
| 3211579       | TLE1        | 7.31E-06           | -2.97644                 | Cis down vs Nor                        |
| 3404636       | GABARAPL1   | 7.48E-06           | 2.45385                  | Cis up vs Nor                          |
| 2677723       | ARHGEF3     | 7.51E-06           | -6.75312                 | Cis down vs Nor                        |
| 2601648       | DOCK10      | 8.10E-06           | -2.62395                 | Cis down vs Nor                        |
| 2494484       | NCAPH       | 8.50E-06           | -2.22122                 | Cis down vs Nor                        |
| 2863885       | LHFPL2      | 8.77E-06           | -3.16874                 | Cis down vs Nor                        |
| 3035892       | GNA12       | 8.98E-06           | -2.28204                 | Cis down vs Nor                        |
| 2982319       | SOD2        | 9.32E-06           | 4.10006                  | Cis up vs Nor                          |
| 2835531       | NDST1       | 1.03E-05           | -2.10048                 | Cis down vs Nor                        |
| 2759582       | AFAP1       | 1.03E-05           | -2.14471                 | Cis down vs Nor                        |
| 3555300       | CCNB1IP1    | 1.04E-05           | 2.09823                  | Cis up vs Nor                          |
| 2420427       | GNG5        | 1.10E-05           | 2.35447                  | Cis up vs Nor                          |
| 3346147       | ARHGAP42    | 1.12E-05           | -6.74962                 | Cis down vs Nor                        |
| 2977265       | HIVEP2      | 1.14E-05           | -3.06369                 | Cis down vs Nor                        |
| 2830861       | EGR1        | 1.15E-05           | 3.47423                  | Cis up vs Nor                          |
| 2830698       | FAM53C      | 1.17E-05           | 2.95936                  | Cis up vs Nor                          |
| 3414632       | DIP2B       | 1.18E-05           | -2.52023                 | Cis down vs Nor                        |
| 3219215       | KLF4        | 1.23E-05           | 2.59393                  | Cis up vs Nor                          |
| 3320123       | ADM         | 1.24E-05           | 2.83297                  | Cis up vs Nor                          |
| 3150060       | EXT1        | 1.29E-05           | -2.98093                 | Cis down vs Nor                        |
| 3147173       | NCALD       | 1.32E-05           | -2.21482                 | Cis down vs Nor                        |
| 3488602       | LRCH1       | 1.44E-05           | -2.58557                 | Cis down vs Nor                        |
| 3228884       | VAV2        | 1.46E-05           | -2.76453                 | Cis down vs Nor                        |
| 3217487       | ALG2        | 1.51E-05           | 2.43915                  | Cis up vs Nor                          |
| 2722377       | STIM2       | 1.53E-05           | -2.84513                 | Cis down vs Nor                        |
| 3063083       | SMURF1      | 1.59E-05           | -2.45678                 | Cis down vs Nor                        |
| 3126368       | PSD3        | 1.64E-05           | -7.20945                 | Cis down vs Nor                        |
| 3009198       | RHBDD2      | 1.67E-05           | 2.40908                  | Cis up vs Nor                          |
| 3598959       | SMAD3       | 1.68E-05           | -2.52977                 | Cis down vs Nor                        |
| 3376155       | NXF1        | 1.68E-05           | 2.73759                  | Cis up vs Nor                          |
| 2852742       | AMACR       | 1.69E-05           | 3.98848                  | Cis up vs Nor                          |
| 3626826       | MYO1E       | 1.72E-05           | -4.14781                 | Cis down vs Nor                        |
| 3419641       | SRGAP1      | 1.73E-05           | -3.48765                 | Cis down vs Nor                        |
| 3508898       | STARD13     | 1.78E-05           | -3.75445                 | Cis down vs Nor                        |
| 2409104       | SLC2A1      | 1.79E-05           | -2.37242                 | Cis down vs Nor                        |
| 3677168       |             | 1.80E-05           | 2.20405                  | Cis up vs Nor                          |
| 2423422       | BCAR3       | 1.81E-05           | -2.66891                 | Cis down vs Nor                        |
| 3887635       | NCOA3       | 1.87E-05           | -2.47846                 | Cis down vs Nor                        |
| 3219885       | PTPN3       | 1.93E-05           | -2.03439                 | Cis down vs Nor                        |
| 3517793       | KLF12       | 1.94E-05           | -3.12417                 | Cis down vs Nor                        |
| 2515471       | DLX1        | 1.95E-05           | 2.17935                  | Cis up vs Nor                          |
| 2402111       | C1orf63     | 1.97E-05           | 6.37443                  | Cis up vs Nor                          |

|         |           |          |          |                 |
|---------|-----------|----------|----------|-----------------|
| 2842429 | C5orf25   | 1.98E-05 | -2.07788 | Cis down vs Nor |
| 2447066 | GLUL      | 2.00E-05 | 2.23039  | Cis up vs Nor   |
| 3291682 | JMJD1C    | 2.07E-05 | -2.68373 | Cis down vs Nor |
| 3610958 | IGF1R     | 2.09E-05 | -4.33744 | Cis down vs Nor |
| 2623308 | GRM2      | 2.09E-05 | 2.3399   | Cis up vs Nor   |
| 3480657 | SAP18     | 2.10E-05 | 2.53121  | Cis up vs Nor   |
| 3723348 | HEXIM1    | 2.11E-05 | 6.24286  | Cis up vs Nor   |
| 2518889 | ZNF804A   | 2.18E-05 | -4.62297 | Cis down vs Nor |
| 3971219 | CNKSR2    | 2.21E-05 | -2.56751 | Cis down vs Nor |
| 2556752 | SPRED2    | 2.21E-05 | -2.67497 | Cis down vs Nor |
| 2835021 | PCYOX1L   | 2.26E-05 | 3.40334  | Cis up vs Nor   |
| 2333677 |           | 2.39E-05 | 2.52817  | Cis up vs Nor   |
| 2957596 | ELOVL5    | 2.39E-05 | -2.36113 | Cis down vs Nor |
| 3799461 | SPIRE1    | 2.44E-05 | -3.77228 | Cis down vs Nor |
| 2326954 | TMEM222   | 2.48E-05 | 2.61579  | Cis up vs Nor   |
| 3430462 | BTBD11    | 2.53E-05 | -2.36748 | Cis down vs Nor |
| 3971806 | SAT1      | 2.59E-05 | 7.57743  | Cis up vs Nor   |
| 2506903 | MGAT5     | 2.59E-05 | -3.43383 | Cis down vs Nor |
| 3975467 | KDM6A     | 2.61E-05 | -4.39429 | Cis down vs Nor |
| 2427208 | GSTM3     | 2.68E-05 | 2.50122  | Cis up vs Nor   |
| 3772525 | CYTH1     | 2.73E-05 | -2.22353 | Cis down vs Nor |
| 3773174 | CBX4      | 2.78E-05 | 2.11382  | Cis up vs Nor   |
| 3340697 | UVRAG     | 2.83E-05 | -3.83005 | Cis down vs Nor |
| 2981874 | DYNLT1    | 2.83E-05 | 2.54071  | Cis up vs Nor   |
| 2643592 | EPHB1     | 2.86E-05 | -2.38137 | Cis down vs Nor |
| 3686339 | XPO6      | 2.88E-05 | -2.30265 | Cis down vs Nor |
| 2375596 | ADORA1    | 2.92E-05 | -2.21867 | Cis down vs Nor |
| 3133345 | SLC20A2   | 2.94E-05 | -2.02587 | Cis down vs Nor |
| 3636956 | WDR73     | 3.00E-05 | 2.03349  | Cis up vs Nor   |
| 3131881 | PPAPDC1B  | 3.05E-05 | 2.86218  | Cis up vs Nor   |
| 3908149 | ZMYND8    | 3.09E-05 | -2.23391 | Cis down vs Nor |
| 4014076 | HDX       | 3.10E-05 | -2.34042 | Cis down vs Nor |
| 2757347 | TMEM129   | 3.18E-05 | 2.01113  | Cis up vs Nor   |
| 3729002 | C17orf71  | 3.21E-05 | 2.9463   | Cis up vs Nor   |
| 3321237 |           | 3.22E-05 | 3.35092  | Cis up vs Nor   |
| 2964553 | BACH2     | 3.24E-05 | -2.33195 | Cis down vs Nor |
| 3215701 | FANCC     | 3.34E-05 | -2.53346 | Cis down vs Nor |
| 2749699 | RAPGEF2   | 3.35E-05 | -3.43972 | Cis down vs Nor |
| 2880361 | JAKMIP2   | 3.36E-05 | -5.47856 | Cis down vs Nor |
| 3822216 | IER2      | 3.40E-05 | 2.25056  | Cis up vs Nor   |
| 2343823 | LPHN2     | 3.42E-05 | -3.55122 | Cis down vs Nor |
| 3392044 | C11orf71  | 3.54E-05 | 2.77676  | Cis up vs Nor   |
| 2397695 | CASP9     | 3.55E-05 | -2.11615 | Cis down vs Nor |
| 3862640 | SERTAD1   | 3.56E-05 | 3.64998  | Cis up vs Nor   |
| 2369484 | TOR3A     | 3.56E-05 | 2.02031  | Cis up vs Nor   |
| 3821893 | JUNB      | 3.69E-05 | 3.56232  | Cis up vs Nor   |
| 2976360 | PERP      | 3.71E-05 | 2.88852  | Cis up vs Nor   |
| 3751625 | SSH2      | 3.75E-05 | -6.22237 | Cis down vs Nor |
| 3430129 | POLR3B    | 3.78E-05 | -3.48414 | Cis down vs Nor |
| 2957227 | TRAM2     | 3.91E-05 | -2.48002 | Cis down vs Nor |
| 2434031 | HIST2H2BF | 3.93E-05 | 11.3433  | Cis up vs Nor   |
| 3561039 | NFKBIA    | 4.01E-05 | 2.51504  | Cis up vs Nor   |
| 2676518 | SFMBT1    | 4.02E-05 | -2.48909 | Cis down vs Nor |
| 2398073 | FBXO42    | 4.05E-05 | -2.42588 | Cis down vs Nor |
| 3988987 | NDUFA1    | 4.13E-05 | 2.19425  | Cis up vs Nor   |
| 3999395 | MID1      | 4.15E-05 | -2.92843 | Cis down vs Nor |
| 2644155 | NCK1      | 4.18E-05 | -2.98265 | Cis down vs Nor |
| 4005392 | BCOR      | 4.20E-05 | -2.72159 | Cis down vs Nor |
| 3858852 | RHPN2     | 4.25E-05 | -2.367   | Cis down vs Nor |
| 2583602 | RBMS1     | 4.34E-05 | -2.84184 | Cis down vs Nor |
| 3762473 | TOB1      | 4.43E-05 | 4.78088  | Cis up vs Nor   |
| 3538703 | MNAT1     | 4.45E-05 | -2.40364 | Cis down vs Nor |
| 3898126 | TASP1     | 4.55E-05 | -11.4856 | Cis down vs Nor |
| 2691014 | GSK3B     | 4.59E-05 | -2.31858 | Cis down vs Nor |
| 3978169 | TSPYL2    | 4.69E-05 | 4.62009  | Cis up vs Nor   |
| 2591367 | CALCRL    | 4.75E-05 | -3.77586 | Cis down vs Nor |
| 3035135 | ZFAND2A   | 4.81E-05 | 3.14552  | Cis up vs Nor   |
| 2468622 | ID2       | 4.85E-05 | 7.87798  | Cis up vs Nor   |
| 2327045 | GPR3      | 4.95E-05 | 2.09063  | Cis up vs Nor   |
| 3920566 | DYRK1A    | 5.15E-05 | -2.76691 | Cis down vs Nor |
| 2897576 | E2F3      | 5.15E-05 | -2.83302 | Cis down vs Nor |
| 3977299 | CLCN5     | 5.19E-05 | -2.28138 | Cis down vs Nor |
| 3888522 | SNAI1     | 5.21E-05 | 2.0614   | Cis up vs Nor   |
| 2772876 | ADAMTS3   | 5.23E-05 | -3.08649 | Cis down vs Nor |

|         |           |             |          |                 |
|---------|-----------|-------------|----------|-----------------|
| 2319881 | PEX14     | 5.39E-05    | -2.13883 | Cis down vs Nor |
| 2975014 | SGK1      | 5.47E-05    | 9.7803   | Cis up vs Nor   |
| 3258221 | HHEX      | 5.54E-05    | 3.6249   | Cis up vs Nor   |
| 3599280 | SKOR1     | 5.55E-05    | -2.03525 | Cis down vs Nor |
| 3959918 | TST       | 5.65E-05    | 3.23168  | Cis up vs Nor   |
| 2871241 | MCC       | 5.71E-05    | -2.13784 | Cis down vs Nor |
| 3081613 | LMBR1     | 5.81E-05    | -6.21398 | Cis down vs Nor |
| 3490251 | WDFY2     | 5.89E-05    | -2.39358 | Cis down vs Nor |
| 2408855 | FOXJ3     | 5.95E-05    | -2.30947 | Cis down vs Nor |
| 2807000 | WDR70     | 6.01E-05    | -3.17016 | Cis down vs Nor |
| 3294280 | DNAJC9    | 6.03E-05    | 2.18331  | Cis up vs Nor   |
| 3329461 | ZNF408    | 6.04E-05    | 2.2681   | Cis up vs Nor   |
| 2325206 |           | 6.04E-05    | 2.26378  | Cis up vs Nor   |
| 3253683 | ZMZ1      | 6.06E-05    | -2.66852 | Cis down vs Nor |
| 3020343 | MET       | 6.07E-05    | -2.80192 | Cis down vs Nor |
| 3139722 | NCOA2     | 6.13E-05    | -2.87221 | Cis down vs Nor |
| 3896078 | SLC23A2   | 6.18E-05    | -2.54526 | Cis down vs Nor |
| 2759303 | MRFAP1L1  | 6.20E-05    | 2.11547  | Cis up vs Nor   |
| 2363562 | FCER1G    | 6.21E-05    | 4.80948  | Cis up vs Nor   |
| 3473083 | MED13L    | 6.24E-05    | -2.70191 | Cis down vs Nor |
| 3261165 | BTRC      | 6.37E-05    | -3.48414 | Cis down vs Nor |
| 2899756 | HIST1H2AG | 6.37E-05    | 2.08299  | Cis up vs Nor   |
| 2946232 | HIST1H1C  | 6.38E-05    | -3.61619 | Cis down vs Nor |
| 3921068 | ETS2      | 6.50E-05    | 2.11438  | Cis up vs Nor   |
| 2360887 | RUSC1     | 6.52E-05    | 2.19241  | Cis up vs Nor   |
| 3992521 | HTATSF1   | 6.67E-05    | 2.22562  | Cis up vs Nor   |
| 3548152 | TDP1      | 6.84E-05    | -2.22197 | Cis down vs Nor |
| 3872542 | ZNF418    | 6.95E-05    | 2.87255  | Cis up vs Nor   |
| 3540862 | GPHN      | 6.96E-05    | -3.45508 | Cis down vs Nor |
| 3697632 | ZNF23     | 7.00E-05    | 2.52678  | Cis up vs Nor   |
| 2768468 | FRYL      | 7.13E-05    | -3.19887 | Cis down vs Nor |
| 2969886 | FYN       | 7.13E-05    | -4.51788 | Cis down vs Nor |
| 3803290 | FAM59A    | 7.20E-05    | -2.33772 | Cis down vs Nor |
| 3049522 | TNS3      | 7.20E-05    | -2.4555  | Cis down vs Nor |
| 3730240 | TLK2      | 7.37E-05    | -2.22486 | Cis down vs Nor |
| 3323052 | NAV2      | 7.46E-05    | -2.3362  | Cis down vs Nor |
| 3277468 | USP6NL    | 7.48E-05    | -2.65161 | Cis down vs Nor |
| 2333670 |           | 7.54E-05    | 2.04649  | Cis up vs Nor   |
| 2887309 | DUSP1     | 7.59E-05    | 2.96858  | Cis up vs Nor   |
| 2562233 | RETSAT    | 7.63E-05    | 3.31099  | Cis up vs Nor   |
| 2326049 | MAN1C1    | 7.66E-05    | -2.79963 | Cis down vs Nor |
| 3278401 | FRMD4A    | 7.70E-05    | -2.08979 | Cis down vs Nor |
| 2583014 | BAZ2B     | 7.76E-05    | -2.66658 | Cis down vs Nor |
| 2403158 | AHDC1     | 7.79E-05    | -2.97386 | Cis down vs Nor |
| 3633460 | PTPN9     | 7.79E-05    | -3.04983 | Cis down vs Nor |
| 2365210 | UCK2      | 7.96E-05    | -2.02944 | Cis down vs Nor |
| 3880191 | GZF1      | 8.13E-05    | 2.49047  | Cis up vs Nor   |
| 3719474 | TADA2A    | 8.13E-05    | -2.08269 | Cis down vs Nor |
| 2857204 | PPAP2A    | 8.17E-05    | -2.46152 | Cis down vs Nor |
| 2327418 | MED18     | 8.37E-05    | 2.42966  | Cis up vs Nor   |
| 3716337 | CCDC55    | 8.42E-05    | -2.01535 | Cis down vs Nor |
| 2998404 | RALA      | 8.42E-05    | -2.05769 | Cis down vs Nor |
| 2369110 | RASAL2    | 8.54E-05    | -2.92316 | Cis down vs Nor |
| 2545613 | SLC30A3   | 8.55E-05    | 2.13403  | Cis up vs Nor   |
| 3391234 | TIMM8B    | 8.64E-05    | 2.39805  | Cis up vs Nor   |
| 3457275 | MMP19     | 8.85E-05    | 2.05488  | Cis up vs Nor   |
| 2869880 | EFNA5     | 8.89E-05    | -3.53924 | Cis down vs Nor |
| 2353988 | FAM46C    | 8.93E-05    | 3.11332  | Cis up vs Nor   |
| 3210808 | GNAQ      | 8.95E-05    | -2.95894 | Cis down vs Nor |
| 2338719 | NFIA      | 8.98E-05    | -2.3191  | Cis down vs Nor |
| 3710681 | MAP2K4    | 9.03E-05    | -2.35811 | Cis down vs Nor |
| 2943808 | NUP153    | 9.09E-05    | -2.92946 | Cis down vs Nor |
| 3687308 | KCTD13    | 9.11E-05    | 3.00047  | Cis up vs Nor   |
| 3099089 | CHCHD7    | 9.14E-05    | 2.94274  | Cis up vs Nor   |
| 3942179 | MTMR3     | 9.57E-05    | -2.55942 | Cis down vs Nor |
| 3161566 | KDM4C     | 9.61E-05    | -2.89906 | Cis down vs Nor |
| 2562867 | RNF103    | 9.66E-05    | 2.57475  | Cis up vs Nor   |
| 3381063 | CLPB      | 9.75E-05    | -2.44163 | Cis down vs Nor |
| 3680213 | SOCS1     | 9.81E-05    | 2.01229  | Cis up vs Nor   |
| 3139035 | ARFGEF1   | 9.82E-05    | -2.19648 | Cis down vs Nor |
| 3178147 | CTSL1     | 9.84E-05    | 2.37387  | Cis up vs Nor   |
| 3190035 | CDK9      | 9.85E-05    | 2.22722  | Cis up vs Nor   |
| 3395464 | ASAM      | 9.91E-05    | -2.07932 | Cis down vs Nor |
| 3015147 | ZKSCAN1   | 0.000100467 | 2.17691  | Cis up vs Nor   |



|         |           |             |          |                 |
|---------|-----------|-------------|----------|-----------------|
| 3201488 | CDKN2B    | 0.000100807 | 2.43971  | Cis up vs Nor   |
| 3559192 | PRKD1     | 0.000101085 | -2.37024 | Cis down vs Nor |
| 3353640 | GRAMD1B   | 0.000101129 | -2.62743 | Cis down vs Nor |
| 2697564 | PIK3CB    | 0.00010163  | -4.47483 | Cis down vs Nor |
| 2410158 | TESK2     | 0.000103293 | -2.37837 | Cis down vs Nor |
| 3213120 | GAS1      | 0.000104543 | -2.44022 | Cis down vs Nor |
| 3770632 | SUMO2     | 0.000105312 | 2.11003  | Cis up vs Nor   |
| 2586845 | SLC25A12  | 0.000106555 | -3.70843 | Cis down vs Nor |
| 3046197 | ELMO1     | 0.000106655 | -3.89016 | Cis down vs Nor |
| 3010030 | RSBN1L    | 0.000108134 | -2.91002 | Cis down vs Nor |
| 2321645 | TMEM51    | 0.00010895  | -2.43499 | Cis down vs Nor |
| 3177880 | DAPK1     | 0.000110931 | -3.83588 | Cis down vs Nor |
| 3788270 | ELAC1     | 0.00011117  | 2.56822  | Cis up vs Nor   |
| 2739079 | SEC24B    | 0.000111739 | -2.15061 | Cis down vs Nor |
| 2828146 | CDC42SE2  | 0.000112137 | -3.80887 | Cis down vs Nor |
| 3928040 | RWDD2B    | 0.000112882 | 2.87595  | Cis up vs Nor   |
| 3429566 | CHST11    | 0.000113263 | -2.75609 | Cis down vs Nor |
| 2549260 | MAP4K3    | 0.000115743 | -3.39439 | Cis down vs Nor |
| 2463482 | OPN3      | 0.000116494 | 2.48859  | Cis up vs Nor   |
| 3132333 | TM2D2     | 0.000116775 | 2.34865  | Cis up vs Nor   |
| 3012064 | CDK14     | 0.000117051 | -2.38108 | Cis down vs Nor |
| 3540136 | HSPA2     | 0.000117302 | 2.46204  | Cis up vs Nor   |
| 3962678 | PACSLN2   | 0.000117731 | -2.19358 | Cis down vs Nor |
| 3882533 | CBFA2T2   | 0.000118151 | -2.33093 | Cis down vs Nor |
| 2509832 | EPC2      | 0.000118206 | -3.20332 | Cis down vs Nor |
| 2947077 | HIST1H3I  | 0.000118591 | -3.94832 | Cis down vs Nor |
| 3483159 | PAN3      | 0.000119508 | -2.3785  | Cis down vs Nor |
| 3189110 | GAPVD1    | 0.00011956  | -2.1429  | Cis down vs Nor |
| 3843419 | ZNF211    | 0.000120073 | 2.85237  | Cis up vs Nor   |
| 2965206 | EPHA7     | 0.00012214  | -2.5066  | Cis down vs Nor |
| 3997946 | PRKX      | 0.000122895 | -3.38415 | Cis down vs Nor |
| 3707990 | TXNDC17   | 0.000123151 | 2.57068  | Cis up vs Nor   |
| 3238231 | MLLT10    | 0.000123961 | -3.55223 | Cis down vs Nor |
| 2748198 | KIAA0922  | 0.000126195 | -3.70037 | Cis down vs Nor |
| 4045676 | S100A13   | 0.000127148 | 2.70278  | Cis up vs Nor   |
| 3482498 | CDK8      | 0.000128566 | -2.73529 | Cis down vs Nor |
| 3528759 | ABHD4     | 0.000128922 | 2.01073  | Cis up vs Nor   |
| 2930418 | UST       | 0.000131721 | -4.66766 | Cis down vs Nor |
| 2461786 | ARID4B    | 0.000133323 | -3.28383 | Cis down vs Nor |
| 2687255 | CBLB      | 0.000133617 | -2.23126 | Cis down vs Nor |
| 3140213 | MSC       | 0.000134161 | -2.41037 | Cis down vs Nor |
| 3018652 | CBLL1     | 0.000138617 | 2.06789  | Cis up vs Nor   |
| 2434124 | HIST2H2BE | 0.000138764 | 3.67866  | Cis up vs Nor   |
| 2711034 | C3orf59   | 0.000139337 | -4.12949 | Cis down vs Nor |
| 3416344 | HOXC9     | 0.000139749 | 2.29844  | Cis up vs Nor   |
| 2645315 | SPSB4     | 0.000140422 | -2.62306 | Cis down vs Nor |
| 3474697 | SPPL3     | 0.000141067 | -2.95132 | Cis down vs Nor |
| 2926323 | EYA4      | 0.000142956 | -2.36398 | Cis down vs Nor |
| 3606304 | AKAP13    | 0.000143799 | -3.23867 | Cis down vs Nor |
| 3223157 | DBC1      | 0.000145294 | -4.20918 | Cis down vs Nor |
| 2778856 | TSPAN5    | 0.000146601 | -4.9065  | Cis down vs Nor |
| 3298738 | WAPAL     | 0.000146617 | -2.07393 | Cis down vs Nor |
| 3227121 | C9orf78   | 0.00014741  | 2.207    | Cis up vs Nor   |
| 3284596 | PARD3     | 0.000147553 | -2.4848  | Cis down vs Nor |
| 2351854 | C1orf162  | 0.000147751 | 4.52779  | Cis up vs Nor   |
| 2901620 | HLA-E     | 0.000148666 | 2.31057  | Cis up vs Nor   |
| 2899171 | HIST1H1E  | 0.000148688 | -2.84495 | Cis down vs Nor |
| 4019570 | UPF3B     | 0.000151861 | 2.22792  | Cis up vs Nor   |
| 3201784 | ELAVL2    | 0.000152477 | -2.86841 | Cis down vs Nor |
| 3283920 | ARHGAP12  | 0.000152485 | -2.92059 | Cis down vs Nor |
| 3252382 | MYST4     | 0.000154765 | -2.93769 | Cis down vs Nor |
| 2737717 | NFKB1     | 0.000155255 | -2.55575 | Cis down vs Nor |
| 3766960 | SMURF2    | 0.00015533  | -2.94229 | Cis down vs Nor |
| 3764933 | TUBD1     | 0.000157118 | -2.51209 | Cis down vs Nor |
| 2939213 | TUBB2A    | 0.000160098 | 3.0547   | Cis up vs Nor   |
| 3858659 | ANKRD27   | 0.000160421 | -2.51924 | Cis down vs Nor |
| 2975867 | MAP3K5    | 0.000161323 | -2.89776 | Cis down vs Nor |
| 3302177 | ARHGAP19  | 0.000162896 | -2.89353 | Cis down vs Nor |
| 2872047 | SEMA6A    | 0.000163919 | -3.93966 | Cis down vs Nor |
| 3321055 | TEAD1     | 0.000164684 | -3.51781 | Cis down vs Nor |
| 3662750 | POLR2C    | 0.000165017 | 2.13444  | Cis up vs Nor   |
| 3740664 | C17orf91  | 0.000166649 | 3.62686  | Cis up vs Nor   |
| 3094611 | LETM2     | 0.000167378 | 2.57452  | Cis up vs Nor   |
| 2943874 | KIF13A    | 0.000167727 | -2.01122 | Cis down vs Nor |

|         |           |             |          |                 |
|---------|-----------|-------------|----------|-----------------|
| 3981164 | ACRC      | 0.000171421 | 3.49004  | Cis up vs Nor   |
| 3381377 | FCHSD2    | 0.000171731 | -3.69725 | Cis down vs Nor |
| 3721400 | EIF1      | 0.000172076 | 3.79707  | Cis up vs Nor   |
| 2471384 | KCNS3     | 0.000174042 | -2.40087 | Cis down vs Nor |
| 3065601 | DPY19L2P2 | 0.000175643 | 2.2644   | Cis up vs Nor   |
| 2523045 | FZD7      | 0.000176284 | 2.69565  | Cis up vs Nor   |
| 3484768 | PDS5B     | 0.000178399 | -2.60702 | Cis down vs Nor |
| 3403077 | C12orf57  | 0.000179624 | 3.06114  | Cis up vs Nor   |
| 3129465 | INTS9     | 0.000179802 | -2.68558 | Cis down vs Nor |
| 2498143 | NCK2      | 0.000179871 | -2.3364  | Cis down vs Nor |
| 2652801 | NLGN1     | 0.000180332 | -2.60291 | Cis down vs Nor |
| 3906160 | CHD6      | 0.000181123 | -2.00651 | Cis down vs Nor |
| 2453370 | PLXNA2    | 0.000182296 | -2.10806 | Cis down vs Nor |
| 2334279 | UROD      | 0.000183761 | 2.85185  | Cis up vs Nor   |
| 3719210 | DHRS11    | 0.000184844 | 2.35684  | Cis up vs Nor   |
| 3737488 | RPTOR     | 0.000186184 | -2.32963 | Cis down vs Nor |
| 2932508 | TIAM2     | 0.0001871   | -2.97666 | Cis down vs Nor |
| 3361971 | ST5       | 0.000187356 | -2.07278 | Cis down vs Nor |
| 2436228 | GATAD2B   | 0.000188085 | -2.23301 | Cis down vs Nor |
| 2401333 | ZNF436    | 0.000189336 | 2.36228  | Cis up vs Nor   |
| 3453177 | C12orf41  | 0.000190997 | 2.36506  | Cis up vs Nor   |
| 4017381 | TSC22D3   | 0.000191083 | 2.00609  | Cis up vs Nor   |
| 3843188 | ZNF547    | 0.000191428 | 4.82616  | Cis up vs Nor   |
| 3080033 | MLL3      | 0.000191641 | -2.09417 | Cis down vs Nor |
| 3837001 | GRLF1     | 0.000191837 | -2.18556 | Cis down vs Nor |
| 3418534 | FAM119B   | 0.000191958 | 2.80799  | Cis up vs Nor   |
| 3180263 | HIATL1    | 0.000193365 | -2.11261 | Cis down vs Nor |
| 2878273 | HBEGF     | 0.000195856 | 3.96982  | Cis up vs Nor   |
| 2796384 | IRF2      | 0.000197544 | -2.23825 | Cis down vs Nor |
| 3378007 | C11orf68  | 0.000197802 | 2.24289  | Cis up vs Nor   |
| 3331603 | C11orf31  | 0.000199668 | 2.49884  | Cis up vs Nor   |
| 3371339 | PHF21A    | 0.00020369  | -2.18218 | Cis down vs Nor |
| 2476411 | TTC27     | 0.000205719 | -2.32201 | Cis down vs Nor |
| 2893130 | FARS2     | 0.000206302 | -2.47931 | Cis down vs Nor |
| 2933392 | SYNJ2     | 0.00020801  | -2.02611 | Cis down vs Nor |
| 3908963 | B4GALT5   | 0.000209141 | -2.5477  | Cis down vs Nor |
| 2478748 | EML4      | 0.000210664 | -2.06537 | Cis down vs Nor |
| 3063536 | TRIM4     | 0.0002117   | 2.59006  | Cis up vs Nor   |
| 3925639 | NRIP1     | 0.000211722 | -2.43325 | Cis down vs Nor |
| 2979267 | ULBP3     | 0.000213001 | 2.10836  | Cis up vs Nor   |
| 3715368 | NLK       | 0.000215354 | -2.36332 | Cis down vs Nor |
| 3164221 | DENND4C   | 0.000215605 | -2.51674 | Cis down vs Nor |
| 3300115 | PPP1R3C   | 0.000215743 | 3.82057  | Cis up vs Nor   |
| 2579572 | ZEB2      | 0.000216505 | -2.05391 | Cis down vs Nor |
| 3258260 | EXOC6     | 0.00021699  | -2.86289 | Cis down vs Nor |
| 2586603 | TLK1      | 0.000218401 | -2.64835 | Cis down vs Nor |
| 3343546 | TMEM135   | 0.000219473 | -2.12868 | Cis down vs Nor |
| 3722535 | ARL4D     | 0.00022024  | 3.43978  | Cis up vs Nor   |
| 3218041 | BAAT      | 0.000220805 | 5.53386  | Cis up vs Nor   |
| 3136888 | TOX       | 0.000221296 | -3.33936 | Cis down vs Nor |
| 3161167 | KIAA1432  | 0.00022205  | -2.04919 | Cis down vs Nor |
| 3801943 | ZNF521    | 0.000222278 | -2.93638 | Cis down vs Nor |
| 4016193 | TMSB15A   | 0.000222535 | 2.20654  | Cis up vs Nor   |
| 3167325 | UBAP1     | 0.000224097 | -2.12253 | Cis down vs Nor |
| 3200982 | MLLT3     | 0.000224101 | -3.60754 | Cis down vs Nor |
| 3498837 | PCCA      | 0.000225466 | -2.40586 | Cis down vs Nor |
| 2360700 | RAG1AP1   | 0.000229042 | 2.08606  | Cis up vs Nor   |
| 2849960 | ZNF622    | 0.000229273 | 2.42852  | Cis up vs Nor   |
| 2401609 | HMGCL     | 0.000229779 | 3.49375  | Cis up vs Nor   |
| 3671448 | HSBP1     | 0.000229991 | 2.87843  | Cis up vs Nor   |
| 3666897 | WWP2      | 0.000230005 | -2.09532 | Cis down vs Nor |
| 3304746 | USMG5     | 0.000230075 | 2.14135  | Cis up vs Nor   |
| 3405032 | ETV6      | 0.000232134 | -2.46941 | Cis down vs Nor |
| 2899772 | HIST1H2AH | 0.000232232 | -2.37449 | Cis down vs Nor |
| 3998444 | HDHD1     | 0.000232883 | -2.18407 | Cis down vs Nor |
| 3267036 | GRK5      | 0.000233713 | -2.58264 | Cis down vs Nor |
| 3510450 | LHFP      | 0.000234324 | -2.89461 | Cis down vs Nor |
| 3883547 | PHF20     | 0.00023565  | -2.12397 | Cis down vs Nor |
| 2852274 | MTMR12    | 0.000236229 | -2.49511 | Cis down vs Nor |
| 2517588 | OSBPL6    | 0.00023674  | -2.2032  | Cis down vs Nor |
| 2909723 | CENPQ     | 0.00023701  | 2.25098  | Cis up vs Nor   |
| 3023483 | FAM40B    | 0.000237226 | 2.00235  | Cis up vs Nor   |
| 3538213 | DAAM1     | 0.00023785  | -2.57357 | Cis down vs Nor |
| 3413927 | DNAJC22   | 0.000238845 | 2.24746  | Cis up vs Nor   |

|         |          |             |          |                 |
|---------|----------|-------------|----------|-----------------|
| 2680591 | LRIG1    | 0.00023888  | -2.14755 | Cis down vs Nor |
| 3542847 | SIPA1L1  | 0.000239172 | -2.38309 | Cis down vs Nor |
| 3789947 | NEDD4L   | 0.000240008 | -2.38743 | Cis down vs Nor |
| 2807949 | GHR      | 0.000241194 | -4.23297 | Cis down vs Nor |
| 3665603 | CTCF     | 0.000242014 | -2.61226 | Cis down vs Nor |
| 3508644 | N4BP2L1  | 0.00024322  | 3.44312  | Cis up vs Nor   |
| 2967650 | RTN4IP1  | 0.000244043 | -2.07906 | Cis down vs Nor |
| 3247818 | BICC1    | 0.000246455 | -2.84303 | Cis down vs Nor |
| 2500550 | MERTK    | 0.000247659 | -2.02332 | Cis down vs Nor |
| 4019160 | KLHL13   | 0.000248011 | -2.20055 | Cis down vs Nor |
| 2379132 | ATF3     | 0.000248479 | 3.48667  | Cis up vs Nor   |
| 2899768 | HIST1H4I | 0.000249082 | 2.73845  | Cis up vs Nor   |
| 3517594 | DIS3     | 0.000249447 | 2.12525  | Cis up vs Nor   |
| 2426385 | VAV3     | 0.000249474 | -4.80037 | Cis down vs Nor |
| 3633191 | C15orf17 | 0.000249804 | 2.60214  | Cis up vs Nor   |
| 2874794 | RAPGEF6  | 0.000249975 | -2.2262  | Cis down vs Nor |
| 3676669 | RNPS1    | 0.000250142 | 2.22486  | Cis up vs Nor   |
| 3415915 | PFDN5    | 0.00025016  | 2.58828  | Cis up vs Nor   |
| 3260937 | C10orf2  | 0.000250334 | 2.21437  | Cis up vs Nor   |
| 3400413 | ERC1     | 0.000251043 | -2.14418 | Cis down vs Nor |
| 3286921 | 8-Mar    | 0.000251555 | -2.32929 | Cis down vs Nor |
| 3634588 | WDR61    | 0.000255429 | 2.21525  | Cis up vs Nor   |
| 3781531 | CABLES1  | 0.000257746 | -3.61227 | Cis down vs Nor |
| 2976626 | REPS1    | 0.000258293 | -2.07233 | Cis down vs Nor |
| 3421897 | CNOT2    | 0.000258308 | -3.16176 | Cis down vs Nor |
| 3157660 | TSTA3    | 0.000260892 | 2.36195  | Cis up vs Nor   |
| 3188993 | ARPC5L   | 0.000261839 | 2.43843  | Cis up vs Nor   |
| 3464983 | ATP2B1   | 0.000264271 | -2.23316 | Cis down vs Nor |
| 3852565 | ASF1B    | 0.000265973 | 2.11185  | Cis up vs Nor   |
| 2980516 | CNKSR3   | 0.000266763 | -2.01011 | Cis down vs Nor |
| 3567984 | PPP2R5E  | 0.000270345 | -2.83314 | Cis down vs Nor |
| 3511817 | ENOX1    | 0.000270427 | -3.44188 | Cis down vs Nor |
| 2475710 | LCLAT1   | 0.000276306 | -2.02109 | Cis down vs Nor |
| 2648141 | MBNL1    | 0.000277445 | -2.07658 | Cis down vs Nor |
| 3256074 | BMPR1A   | 0.000280771 | -3.56996 | Cis down vs Nor |
| 3200040 | BNC2     | 0.000283043 | -2.59199 | Cis down vs Nor |
| 3143660 | MMP16    | 0.000283081 | -2.11104 | Cis down vs Nor |
| 3911217 | PMEP A1  | 0.000284168 | -2.98434 | Cis down vs Nor |
| 3019565 | C7orf53  | 0.000285026 | 9.67771  | Cis up vs Nor   |
| 2695295 | ASTE1    | 0.000285697 | 2.27573  | Cis up vs Nor   |
| 3203990 | KIAA1161 | 0.000286392 | 2.3295   | Cis up vs Nor   |
| 3887479 | EYA2     | 0.000287904 | -3.24099 | Cis down vs Nor |
| 3387171 | CWC15    | 0.000288336 | 2.14663  | Cis up vs Nor   |
| 2513925 | B3GALT1  | 0.00029209  | -6.23851 | Cis down vs Nor |
| 2989050 | RAC1     | 0.000292372 | 2.15619  | Cis up vs Nor   |
| 3526831 | RASA3    | 0.000294724 | -2.25984 | Cis down vs Nor |
| 3156307 | PTK2     | 0.000297253 | -2.25923 | Cis down vs Nor |
| 3862650 | SERTAD3  | 0.000298138 | 2.3585   | Cis up vs Nor   |
| 2664452 | ANKRD28  | 0.000298404 | -2.58664 | Cis down vs Nor |
| 3753690 | PEX12    | 0.000300418 | 2.51147  | Cis up vs Nor   |
| 3382972 | RSF1     | 0.000300705 | -3.21574 | Cis down vs Nor |
| 3536786 | FBXO34   | 0.000302156 | -2.05658 | Cis down vs Nor |
| 2510713 | FMNL2    | 0.000304459 | -2.21853 | Cis down vs Nor |
| 3970476 | SCML1    | 0.000306892 | 2.6369   | Cis up vs Nor   |
| 3240452 | BAMBI    | 0.000307311 | 3.55398  | Cis up vs Nor   |
| 2933331 | SNX9     | 0.00030739  | -2.16164 | Cis down vs Nor |
| 3770944 | H3F3B    | 0.000308169 | 2.04728  | Cis up vs Nor   |
| 3968122 | TBL1X    | 0.000309681 | -2.25172 | Cis down vs Nor |
| 2963929 | RNGTT    | 0.000310661 | -2.78744 | Cis down vs Nor |
| 2999303 | MRPL32   | 0.000312459 | 2.24396  | Cis up vs Nor   |
| 3362468 | SBF2     | 0.000316674 | -2.81737 | Cis down vs Nor |
| 3190151 | SLC25A25 | 0.000317236 | 2.27264  | Cis up vs Nor   |
| 3696666 | NQO1     | 0.00031758  | 2.64486  | Cis up vs Nor   |
| 2694753 | C3orf25  | 0.000318217 | 2.13916  | Cis up vs Nor   |
| 3387413 | FAM76B   | 0.000320369 | 2.50811  | Cis up vs Nor   |
| 2678116 | FAM116A  | 0.000325043 | -3.34712 | Cis down vs Nor |
| 2554975 | BCL11A   | 0.000325625 | -2.05233 | Cis down vs Nor |
| 2618640 | RPL14    | 0.000326343 | 2.55564  | Cis up vs Nor   |
| 3253438 | RPS24    | 0.000326412 | 2.18209  | Cis up vs Nor   |
| 3253453 |          | 0.000326412 | 2.18209  | Cis up vs Nor   |
| 2437307 | SCAMP3   | 0.00032689  | 2.27887  | Cis up vs Nor   |
| 2486178 | MEIS1    | 0.000330529 | -3.40401 | Cis down vs Nor |
| 2658595 | HES1     | 0.000330953 | 3.2538   | Cis up vs Nor   |
| 2546409 | ALK      | 0.00033096  | -2.63956 | Cis down vs Nor |

|         |           |             |          |                 |
|---------|-----------|-------------|----------|-----------------|
| 2946681 | HIST1H2BJ | 0.00033101  | 2.04791  | Cis up vs Nor   |
| 3706736 | TMEM93    | 0.000332657 | 2.05101  | Cis up vs Nor   |
| 3273484 | LARP4B    | 0.000335055 | -3.02645 | Cis down vs Nor |
| 3019793 | FOXP2     | 0.000339768 | -3.51072 | Cis down vs Nor |
| 3082503 | ZNF596    | 0.000339841 | 2.4218   | Cis up vs Nor   |
| 2358743 | SCNM1     | 0.00034278  | 2.1447   | Cis up vs Nor   |
| 3376235 | WDR74     | 0.000343038 | 2.32755  | Cis up vs Nor   |
| 2582124 | NR4A2     | 0.000343464 | 2.20035  | Cis up vs Nor   |
| 3238466 | COMMD3    | 0.000344207 | 2.35823  | Cis up vs Nor   |
| 2782822 | NDST4     | 0.000344625 | -2.80595 | Cis down vs Nor |
| 2603897 | TIGD1     | 0.000347879 | 4.34466  | Cis up vs Nor   |
| 4007617 | PIM2      | 0.000350118 | 2.71662  | Cis up vs Nor   |
| 2935475 | QKI       | 0.000350545 | -2.23224 | Cis down vs Nor |
| 2672467 | CCDC12    | 0.000351027 | -2.45729 | Cis down vs Nor |
| 3623683 | GABPB1    | 0.000351481 | -2.60545 | Cis down vs Nor |
| 3672830 | MAP1LC3B  | 0.000352249 | 2.59451  | Cis up vs Nor   |
| 3776139 | NDC80     | 0.000354232 | -2.01912 | Cis down vs Nor |
| 3677164 | TCEB2     | 0.000354282 | 2.33104  | Cis up vs Nor   |
| 2866225 | MEF2C     | 0.000354924 | -3.05653 | Cis down vs Nor |
| 3717539 | RHOT1     | 0.000357414 | -2.19358 | Cis down vs Nor |
| 3328600 | TSPAN18   | 0.000360806 | -3.96113 | Cis down vs Nor |
| 3424442 | TMTC2     | 0.000362236 | -2.11498 | Cis down vs Nor |
| 2980290 | RGS17     | 0.000362608 | -2.13598 | Cis down vs Nor |
| 2768396 | TEC       | 0.000363082 | -2.74927 | Cis down vs Nor |
| 2341083 | GADD45A   | 0.000366218 | 2.10863  | Cis up vs Nor   |
| 2694931 | TMCC1     | 0.000366798 | -2.71219 | Cis down vs Nor |
| 3447348 | SOX5      | 0.000370035 | -2.25888 | Cis down vs Nor |
| 2400177 | CAMK2N1   | 0.000370921 | 2.06772  | Cis up vs Nor   |
| 3843180 | ZNF304    | 0.000373692 | 2.29569  | Cis up vs Nor   |
| 3081624 | LMBR1     | 0.000373997 | -2.57392 | Cis down vs Nor |
| 3732230 | PITPNC1   | 0.000374207 | -2.94807 | Cis down vs Nor |
| 3216671 | CTSL2     | 0.000374321 | 2.63097  | Cis up vs Nor   |
| 3348748 | C11orf1   | 0.000374747 | 2.34412  | Cis up vs Nor   |
| 3773241 | TBC1D16   | 0.000378597 | -2.95901 | Cis down vs Nor |
| 3970642 | CDKL5     | 0.000378726 | -2.12262 | Cis down vs Nor |
| 3303392 | BLOC1S2   | 0.000384793 | 2.18758  | Cis up vs Nor   |
| 2600689 | EPHA4     | 0.00038791  | -3.49629 | Cis down vs Nor |
| 3482845 | RASL11A   | 0.000390709 | 4.34464  | Cis up vs Nor   |
| 2946714 | HIST1H2BK | 0.000390745 | 3.15789  | Cis up vs Nor   |
| 3412345 | TMEM117   | 0.00039433  | -4.32322 | Cis down vs Nor |
| 3453837 | TUBA1A    | 0.000394555 | 2.06886  | Cis up vs Nor   |
| 3752424 | C17orf79  | 0.000394758 | 2.19832  | Cis up vs Nor   |
| 3251490 | CCDC109A  | 0.000395541 | -2.55726 | Cis down vs Nor |
| 3227645 | UCK1      | 0.00039594  | 2.01025  | Cis up vs Nor   |
| 3322501 | MYOD1     | 0.00039657  | -2.50888 | Cis down vs Nor |
| 3407229 | AEBP2     | 0.000398385 | -2.62089 | Cis down vs Nor |
| 3173508 | PGM5      | 0.000399559 | -2.25771 | Cis down vs Nor |
| 2746693 | ARHGAP10  | 0.000400118 | -2.17938 | Cis down vs Nor |
| 3649052 | MKL2      | 0.000400616 | -2.06119 | Cis down vs Nor |
| 2438458 | CRABP2    | 0.00040405  | 2.11357  | Cis up vs Nor   |
| 3563317 | RPS29     | 0.000404228 | 2.13638  | Cis up vs Nor   |
| 3869847 | ZNF468    | 0.000404728 | 2.96727  | Cis up vs Nor   |
| 3105777 | WWP1      | 0.00040584  | -2.04789 | Cis down vs Nor |
| 2908052 | POLR1C    | 0.000411075 | 2.29858  | Cis up vs Nor   |
| 3884612 | SNHG11    | 0.000411308 | 2.66243  | Cis up vs Nor   |
| 3937891 | FLJ39582  | 0.000412437 | 3.21132  | Cis up vs Nor   |
| 3335736 | DRAP1     | 0.000414209 | 2.05293  | Cis up vs Nor   |
| 3441941 | VAMP1     | 0.000416148 | 3.28076  | Cis up vs Nor   |
| 3635553 | STARD5    | 0.00041732  | 3.73355  | Cis up vs Nor   |
| 3742067 | UBE2G1    | 0.000421251 | -2.20848 | Cis down vs Nor |
| 2806799 | NIPBL     | 0.000423428 | -2.27511 | Cis down vs Nor |
| 2947073 | HIST1H1B  | 0.000423813 | -4.35829 | Cis down vs Nor |
| 2810458 | GPBP1     | 0.000424659 | -2.9182  | Cis down vs Nor |
| 3735478 | SPHK1     | 0.000426126 | 2.27832  | Cis up vs Nor   |
| 2489545 | HK2       | 0.000430383 | -2.02541 | Cis down vs Nor |
| 3610804 | IGF1R     | 0.000432024 | -2.42415 | Cis down vs Nor |
| 3791482 | PHLPP1    | 0.00043498  | -3.04808 | Cis down vs Nor |
| 2544925 | ASXL2     | 0.000437265 | -2.42734 | Cis down vs Nor |
| 2420790 | C1orf52   | 0.000440861 | 2.50217  | Cis up vs Nor   |
| 2460519 | EXOC8     | 0.000443148 | 3.35906  | Cis up vs Nor   |
| 4024160 | ATP11C    | 0.000446929 | -2.37656 | Cis down vs Nor |
| 3631517 | THAP10    | 0.000446963 | 3.83568  | Cis up vs Nor   |
| 2860666 | TAF9      | 0.000452991 | 2.34147  | Cis up vs Nor   |
| 2430762 | WARS2     | 0.000453428 | -2.33703 | Cis down vs Nor |

|         |           |             |          |                 |
|---------|-----------|-------------|----------|-----------------|
| 3347831 | DDX10     | 0.000455437 | -3.0743  | Cis down vs Nor |
| 2934191 | PNLDC1    | 0.000465247 | 4.1993   | Cis up vs Nor   |
| 3062193 | SLC25A13  | 0.000467015 | -2.11671 | Cis down vs Nor |
| 3321150 | ARNTL     | 0.000467128 | -4.23592 | Cis down vs Nor |
| 4021633 | ENOX2     | 0.000473732 | -3.16348 | Cis down vs Nor |
| 3980745 | FOXO4     | 0.000474067 | 2.541    | Cis up vs Nor   |
| 2966636 | ASCC3     | 0.000474283 | -2.25495 | Cis down vs Nor |
| 3013178 | CASD1     | 0.000474842 | -2.54155 | Cis down vs Nor |
| 3587015 | KLF13     | 0.000477781 | -2.12641 | Cis down vs Nor |
| 3434012 | HSPB8     | 0.000479065 | 2.6807   | Cis up vs Nor   |
| 3422215 | THAP2     | 0.000480537 | 4.6598   | Cis up vs Nor   |
| 2558976 | MCEE      | 0.000480654 | 2.50558  | Cis up vs Nor   |
| 3273578 | IDI2      | 0.000480877 | 4.3405   | Cis up vs Nor   |
| 2874696 |           | 0.000482229 | 2.43005  | Cis up vs Nor   |
| 3510963 | SUGT1P3   | 0.000485296 | 3.45468  | Cis up vs Nor   |
| 3182984 | NIPSNAP3B | 0.000488755 | 5.19772  | Cis up vs Nor   |
| 3272205 | INPP5A    | 0.00049037  | -2.15732 | Cis down vs Nor |
| 3367096 | LGR4      | 0.000492131 | -2.83042 | Cis down vs Nor |
| 2825514 | DMXL1     | 0.000497873 | -2.1637  | Cis down vs Nor |
| 2766359 | RFC1      | 0.000498206 | -2.06755 | Cis down vs Nor |
| 2835715 | GPX3      | 0.000499556 | 2.4362   | Cis up vs Nor   |
| 3546924 | FLRT2     | 0.000502255 | -3.06202 | Cis down vs Nor |
| 2446240 | TOR1AIP2  | 0.000506212 | -2.34763 | Cis down vs Nor |
| 3354535 | PKNOX2    | 0.000507688 | -2.26261 | Cis down vs Nor |
| 3605780 | SCAND2    | 0.000511246 | 2.01139  | Cis up vs Nor   |
| 3975893 | PHF16     | 0.000512738 | -2.22182 | Cis down vs Nor |
| 3458857 | AVIL      | 0.000518773 | 2.16524  | Cis up vs Nor   |
| 2345617 | PKN2      | 0.00052162  | -2.20587 | Cis down vs Nor |
| 3796992 | C18orf18  | 0.000522544 | 2.63157  | Cis up vs Nor   |
| 3518169 | COMMMD6   | 0.000524212 | 2.56323  | Cis up vs Nor   |
| 3507710 | SLC7A1    | 0.000525606 | -2.21365 | Cis down vs Nor |
| 2356181 | RBM8A     | 0.000529189 | 2.76454  | Cis up vs Nor   |
| 3281068 | PIP4K2A   | 0.000529294 | -2.08463 | Cis down vs Nor |
| 2899206 | HIST1H2BF | 0.000537666 | -2.59889 | Cis down vs Nor |
| 2879312 | NR3C1     | 0.000546967 | -2.01688 | Cis down vs Nor |
| 3903461 | FLJ38773  | 0.000550335 | 3.16227  | Cis up vs Nor   |
| 2712040 | ACAP2     | 0.000555913 | -2.24493 | Cis down vs Nor |
| 3229529 | CAMSAP1   | 0.000559387 | -2.11285 | Cis down vs Nor |
| 2947100 | HIST1H2AM | 0.000563281 | 2.93087  | Cis up vs Nor   |
| 2769182 | SCFD2     | 0.000566564 | -2.30618 | Cis down vs Nor |
| 3066297 | SRPK2     | 0.000568568 | -2.26194 | Cis down vs Nor |
| 3567469 | TRMT5     | 0.000568931 | 2.34954  | Cis up vs Nor   |
| 2873897 | 3-Mar     | 0.000570902 | -3.22068 | Cis down vs Nor |
| 2832081 | ZMAT2     | 0.000572402 | 2.05872  | Cis up vs Nor   |
| 2549565 | SLC8A1    | 0.000576276 | -2.02308 | Cis down vs Nor |
| 3375307 | CYBASC3   | 0.000577086 | 2.63344  | Cis up vs Nor   |
| 3167220 | UBE2R2    | 0.000579116 | -2.50812 | Cis down vs Nor |
| 2333667 |           | 0.000579239 | 2.1201   | Cis up vs Nor   |
| 3410614 | FGD4      | 0.000579447 | -2.10425 | Cis down vs Nor |
| 2796484 | CASP3     | 0.000580919 | 2.43428  | Cis up vs Nor   |
| 2677653 | C3orf63   | 0.000582972 | -2.13019 | Cis down vs Nor |
| 3631794 | MYO9A     | 0.00058304  | -2.08319 | Cis down vs Nor |
| 3917938 | HUNK      | 0.000586137 | -3.67486 | Cis down vs Nor |
| 2708922 | IGF2BP2   | 0.000586733 | -2.91591 | Cis down vs Nor |
| 3383322 | NARS2     | 0.000587964 | -2.06343 | Cis down vs Nor |
| 3237788 | PLXDC2    | 0.000590222 | -2.30845 | Cis down vs Nor |
| 2887164 | SH3PXD2B  | 0.000594135 | -3.0754  | Cis down vs Nor |
| 3865223 | TRAPPC6A  | 0.000594395 | 2.06181  | Cis up vs Nor   |
| 3575567 | FOXN3     | 0.000594447 | -4.07765 | Cis down vs Nor |
| 3020496 | ST7       | 0.000601429 | -2.2175  | Cis down vs Nor |
| 3687889 | ZNF785    | 0.000608228 | 2.01176  | Cis up vs Nor   |
| 3375648 | FTH1      | 0.000609305 | 4.23629  | Cis up vs Nor   |
| 2573641 | CLASP1    | 0.000616918 | -2.04273 | Cis down vs Nor |
| 3444180 | KLRAF1    | 0.000621793 | 4.86541  | Cis up vs Nor   |
| 2896177 | JARID2    | 0.000626051 | -2.94972 | Cis down vs Nor |
| 3145107 | CCNE2     | 0.000626143 | 2.03344  | Cis up vs Nor   |
| 2372858 | RGS2      | 0.000629287 | 4.20568  | Cis up vs Nor   |
| 3600713 | C15orf34  | 0.000634396 | 4.82671  | Cis up vs Nor   |
| 2380590 | TGFB2     | 0.000637156 | -2.85368 | Cis down vs Nor |
| 3766716 | TEX2      | 0.000640661 | -2.12779 | Cis down vs Nor |
| 3761378 | HOXB5     | 0.000645688 | 2.79497  | Cis up vs Nor   |
| 2458649 | C1orf55   | 0.000648288 | 2.40872  | Cis up vs Nor   |
| 2491386 | TCF7L1    | 0.000652033 | -2.03156 | Cis down vs Nor |
| 3197140 | GLIS3     | 0.000654234 | -2.91738 | Cis down vs Nor |

|         |              |             |          |                 |
|---------|--------------|-------------|----------|-----------------|
| 2582562 | ACVR1        | 0.000655804 | -2.00833 | Cis down vs Nor |
| 3392874 |              | 0.000657449 | 2.45817  | Cis up vs Nor   |
| 2652410 | FNDC3B       | 0.000659429 | -3.11135 | Cis down vs Nor |
| 3337067 | RPS6KB2      | 0.000661303 | 2.02277  | Cis up vs Nor   |
| 3591674 | C15orf63     | 0.000663396 | 3.53211  | Cis up vs Nor   |
| 3042849 | HOXA5        | 0.000665558 | 2.0936   | Cis up vs Nor   |
| 3753288 | CCT6B        | 0.000666616 | 2.18793  | Cis up vs Nor   |
| 2759404 | GRPEL1       | 0.000667163 | 2.0117   | Cis up vs Nor   |
| 3365525 | SPTY2D1      | 0.000668681 | 2.27359  | Cis up vs Nor   |
| 2717101 | KIAA0232     | 0.00067089  | -4.06053 | Cis down vs Nor |
| 4014251 | CHM          | 0.000672105 | -2.30838 | Cis down vs Nor |
| 2736462 | BMPR1B       | 0.000672206 | -2.19697 | Cis down vs Nor |
| 3423622 | SYT1         | 0.000676439 | -4.34615 | Cis down vs Nor |
| 2329752 | ZMYM4        | 0.000688428 | -2.08375 | Cis down vs Nor |
| 3592366 | SPATA5L1     | 0.00069515  | 2.17137  | Cis up vs Nor   |
| 3528994 | ACIN1        | 0.00070443  | 2.11199  | Cis up vs Nor   |
| 2776372 | WDFY3        | 0.000705671 | -2.11714 | Cis down vs Nor |
| 3988874 | UBE2A        | 0.000706944 | 2.25962  | Cis up vs Nor   |
| 2353237 | VANGL1       | 0.000707339 | -2.04331 | Cis down vs Nor |
| 2766893 | APBB2        | 0.000710312 | -3.21724 | Cis down vs Nor |
| 3872983 | CHMP2A       | 0.000719794 | 2.03538  | Cis up vs Nor   |
| 2973376 | PTPRK        | 0.000737071 | -3.05431 | Cis down vs Nor |
| 3264621 | TCF7L2       | 0.000737956 | -3.28078 | Cis down vs Nor |
| 3042919 | HOXA9        | 0.000739822 | 2.26592  | Cis up vs Nor   |
| 3349051 | LOC100132686 | 0.000743301 | 2.70064  | Cis up vs Nor   |
| 2629782 | EBLN2        | 0.000746242 | -2.10705 | Cis down vs Nor |
| 2342738 | ST6GALNAC3   | 0.000750005 | -2.45129 | Cis down vs Nor |
| 2828796 | LEAP2        | 0.000757459 | 4.22625  | Cis up vs Nor   |
| 2878446 | NDUFA2       | 0.000758857 | 2.35807  | Cis up vs Nor   |
| 3027961 | TAS2R5       | 0.000761213 | 2.37813  | Cis up vs Nor   |
| 3254521 | TSPAN14      | 0.000762044 | -2.21401 | Cis down vs Nor |
| 3985320 | BHLHB9       | 0.000762128 | -2.00089 | Cis down vs Nor |
| 2544219 | PFN4         | 0.00077318  | 2.47883  | Cis up vs Nor   |
| 2781813 | ELOVL6       | 0.000773223 | -3.84523 | Cis down vs Nor |
| 3140037 | EYA1         | 0.000773866 | -2.52569 | Cis down vs Nor |
| 2922972 | DCBLD1       | 0.000779119 | -2.04179 | Cis down vs Nor |
| 4043943 | INPP5B       | 0.000783765 | -2.05236 | Cis down vs Nor |
| 2705445 | PLD1         | 0.000787193 | -2.09093 | Cis down vs Nor |
| 3945225 | MAFF         | 0.000788348 | 2.02021  | Cis up vs Nor   |
| 3832978 | ZFP36        | 0.000789362 | 2.66402  | Cis up vs Nor   |
| 2807886 | FBXO4        | 0.000794118 | 2.00039  | Cis up vs Nor   |
| 2523635 | CYP20A1      | 0.000799943 | -2.0456  | Cis down vs Nor |
| 3824874 | IFI30        | 0.000800683 | 2.46919  | Cis up vs Nor   |
| 3750767 | ALDOC        | 0.000801133 | 2.91085  | Cis up vs Nor   |
| 4027708 | MTCP1        | 0.000810062 | 2.58224  | Cis up vs Nor   |
| 2482230 | ERLEC1       | 0.000811267 | -2.05357 | Cis down vs Nor |
| 2686646 | SENP7        | 0.00081922  | -2.4697  | Cis down vs Nor |
| 3553690 | MARK3        | 0.000822673 | -2.0457  | Cis down vs Nor |
| 3718555 | SLFN5        | 0.000826022 | 3.06154  | Cis up vs Nor   |
| 3430716 | FICD         | 0.000826137 | 2.16346  | Cis up vs Nor   |
| 3722182 | AOC2         | 0.000826623 | 3.85872  | Cis up vs Nor   |
| 2753880 | CDKN2AIP     | 0.00082916  | 2.61671  | Cis up vs Nor   |
| 2812435 | ERBB2IP      | 0.000830165 | -2.13397 | Cis down vs Nor |
| 2690956 | POPDC2       | 0.000836474 | 2.83424  | Cis up vs Nor   |
| 3834599 | ZNF574       | 0.000844066 | 2.00881  | Cis up vs Nor   |
| 3315549 | PSMD13       | 0.000844856 | 2.10807  | Cis up vs Nor   |
| 2480168 | PRKCE        | 0.000848105 | -2.34525 | Cis down vs Nor |
| 3882854 | ITCH         | 0.000848365 | -2.05288 | Cis down vs Nor |
| 3018866 | DNAJB9       | 0.000850842 | 3.02399  | Cis up vs Nor   |
| 3286792 | C10orf25     | 0.000851475 | 2.08084  | Cis up vs Nor   |
| 3043264 | JAZF1        | 0.000864832 | -2.04878 | Cis down vs Nor |
| 3079803 | PRKAG2       | 0.000872272 | -2.10581 | Cis down vs Nor |
| 3669092 | TERF2IP      | 0.000892339 | 2.17619  | Cis up vs Nor   |
| 2777487 | FAM13A       | 0.000895821 | -2.40593 | Cis down vs Nor |
| 3526544 | DCUN1D2      | 0.000904533 | 2.28606  | Cis up vs Nor   |
| 3592023 | B2M          | 0.000906097 | 2.05057  | Cis up vs Nor   |
| 3382216 | ARRB1        | 0.000907613 | -2.34292 | Cis down vs Nor |
| 2496536 | RPL31        | 0.000912761 | 2.34609  | Cis up vs Nor   |
| 3068476 | TMEM168      | 0.000925772 | -2.34015 | Cis down vs Nor |
| 3907507 | C20orf165    | 0.00092734  | 2.11907  | Cis up vs Nor   |
| 2419046 | ZZZ3         | 0.000931859 | -2.3222  | Cis down vs Nor |
| 3578069 | C14orf139    | 0.000934835 | -2.41674 | Cis down vs Nor |
| 2412222 |              | 0.000940405 | 7.86714  | Cis up vs Nor   |
| 3588658 | C15orf41     | 0.000945609 | -2.07874 | Cis down vs Nor |

|         |          |             |          |                 |
|---------|----------|-------------|----------|-----------------|
| 2791197 | PDGFC    | 0.000946592 | -3.64394 | Cis down vs Nor |
| 2340078 | CACHD1   | 0.000956888 | -3.0606  | Cis down vs Nor |
| 2693081 | ZNF148   | 0.000956958 | -2.71084 | Cis down vs Nor |
| 2487549 | MXD1     | 0.00095773  | 2.24702  | Cis up vs Nor   |
| 3522398 | DOCK9    | 0.000959125 | -2.15507 | Cis down vs Nor |
| 3449760 | DENND5B  | 0.000961387 | -2.29435 | Cis down vs Nor |
| 2946259 | HIST1H1T | 0.000961558 | 3.3041   | Cis up vs Nor   |
| 2864849 | SSBP2    | 0.00096198  | -3.38302 | Cis down vs Nor |
| 2484970 | EHP1     | 0.000962586 | -2.53074 | Cis down vs Nor |
| 3996083 | TMEM187  | 0.00096259  | 2.44446  | Cis up vs Nor   |
| 2460189 | PGBD5    | 0.000964537 | -2.34453 | Cis down vs Nor |
| 3659931 | PAPD5    | 0.00096602  | -3.1824  | Cis down vs Nor |
| 3618333 | MEIS2    | 0.000969655 | -2.20686 | Cis down vs Nor |
| 2648535 | ARHGEF26 | 0.000969753 | -2.22883 | Cis down vs Nor |
| 3168508 | MELK     | 0.000971678 | -2.74529 | Cis down vs Nor |
| 2529546 | ACSL3    | 0.000973744 | -2.11399 | Cis down vs Nor |
| 3571904 | NPC2     | 0.000975192 | 2.01285  | Cis up vs Nor   |
| 2844709 | CNOT6    | 0.000986804 | -2.17511 | Cis down vs Nor |
| 2973694 | ARHGAP18 | 0.000988251 | -2.96055 | Cis down vs Nor |
| 3524999 | LIG4     | 0.00100674  | 2.1849   | Cis up vs Nor   |
| 2961300 | COX7A2   | 0.00100743  | 2.60473  | Cis up vs Nor   |
| 2412082 | FAF1     | 0.0010108   | -2.06028 | Cis down vs Nor |
| 3694657 | CDH11    | 0.00101833  | -2.90717 | Cis down vs Nor |
| 2599993 | ABCB6    | 0.00102063  | 2.75377  | Cis up vs Nor   |
| 3042001 | CYCS     | 0.00102406  | 2.19783  | Cis up vs Nor   |
| 2810395 | C5orf35  | 0.00102586  | 2.20344  | Cis up vs Nor   |
| 3292779 | SLC25A16 | 0.00103099  | 2.54809  | Cis up vs Nor   |
| 2615360 | TGFBR2   | 0.00103389  | -2.61836 | Cis down vs Nor |
| 3397877 | ARHGAP32 | 0.00103746  | -2.12287 | Cis down vs Nor |
| 3401828 | DYRK4    | 0.00105095  | 2.92477  | Cis up vs Nor   |
| 3851441 | ZNF442   | 0.00105237  | 2.24782  | Cis up vs Nor   |
| 3261886 | C10orf26 | 0.0010579   | -3.38521 | Cis down vs Nor |
| 2758870 | CYTL1    | 0.00107432  | 2.34358  | Cis up vs Nor   |
| 3406195 | C12orf60 | 0.00107505  | 2.95545  | Cis up vs Nor   |
| 3776193 | SMCHD1   | 0.00107779  | -2.20292 | Cis down vs Nor |
| 3463727 | LIN7A    | 0.00108593  | -2.31476 | Cis down vs Nor |
| 2874686 | HINT1    | 0.00109079  | 2.17044  | Cis up vs Nor   |

**Supplementary table S3C: Genes showing alternative splicing and differential expression between normal and cisplatin treated conditions**

| Transcript Cluster ID | Gene Symbol | p-value(Condition) | Alt-splicing(Condition) | Fold-Change(Cis vs. Nor) | Fold-Change(Cis vs. Nor) (Description) |
|-----------------------|-------------|--------------------|-------------------------|--------------------------|----------------------------------------|
| 3995804               | SLC6A8      | 4.14E-07           | 2.90E-05                | 2.06006                  | Cis up vs Nor                          |
| 3790704               | PMAIP1      | 7.38E-07           | 4.98E-07                | 10.709                   | Cis up vs Nor                          |
| 2910680               | LRRC1       | 7.44E-07           | 3.55E-11                | -2.03935                 | Cis down vs Nor                        |
| 3078493               | ZNF425      | 9.58E-07           | 2.44E-13                | 7.15594                  | Cis up vs Nor                          |
| 2892979               | CDYL        | 1.26E-06           | 2.17E-26                | -2.49978                 | Cis down vs Nor                        |
| 3180717               | C9orf102    | 2.38E-06           | 1.80E-06                | -2.82613                 | Cis down vs Nor                        |
| 3407096               | PLEKHA5     | 3.68E-06           | 1.08E-19                | -3.08649                 | Cis down vs Nor                        |
| 3858285               | TSHZ3       | 3.70E-06           | 0.00100915              | -7.29249                 | Cis down vs Nor                        |
| 3590239               | DLL4        | 3.70E-06           | 4.02E-09                | 2.64509                  | Cis up vs Nor                          |
| 3289235               | SGMS1       | 3.75E-06           | 3.46E-16                | -2.58304                 | Cis down vs Nor                        |
| 2675628               | VPRBP       | 3.97E-06           | 2.41E-14                | -2.44346                 | Cis down vs Nor                        |
| 2904329               | ANKS1A      | 4.29E-06           | 4.57E-17                | -2.99869                 | Cis down vs Nor                        |
| 2734421               | ARHGAP24    | 4.30E-06           | 1.22E-18                | -4.06693                 | Cis down vs Nor                        |
| 3928070               | CCT8        | 5.18E-06           | 3.77E-09                | 2.18588                  | Cis up vs Nor                          |
| 3501661               | ARHGEF7     | 5.26E-06           | 4.59E-23                | -2.63583                 | Cis down vs Nor                        |
| 3544525               | FOS         | 5.31E-06           | 2.69E-10                | 9.07852                  | Cis up vs Nor                          |
| 2903343               | BRD2        | 5.46E-06           | 1.90E-20                | 2.12622                  | Cis up vs Nor                          |
| 3176209               | TLE4        | 5.65E-06           | 7.76E-15                | -3.7336                  | Cis down vs Nor                        |
| 3757970               | PSMC3IP     | 5.68E-06           | 0.002618                | 2.72188                  | Cis up vs Nor                          |
| 2509740               | MBD5        | 6.20E-06           | 1.19E-10                | -2.23035                 | Cis down vs Nor                        |
| 3099566               | FAM110B     | 6.49E-06           | 2.22E-05                | -4.90272                 | Cis down vs Nor                        |
| 3108859               | OSR2        | 6.55E-06           | 7.67E-09                | 2.28594                  | Cis up vs Nor                          |
| 3571347               | NUMB        | 6.96E-06           | 6.19E-12                | -2.80428                 | Cis down vs Nor                        |
| 3211579               | TLE1        | 7.31E-06           | 3.97E-09                | -2.97644                 | Cis down vs Nor                        |
| 3404636               | GABARAPL1   | 7.48E-06           | 5.93E-06                | 2.45385                  | Cis up vs Nor                          |
| 2677723               | ARHGEF3     | 7.51E-06           | 2.11E-16                | -6.75312                 | Cis down vs Nor                        |
| 2601648               | DOCK10      | 8.10E-06           | 1.18E-06                | -2.62394                 | Cis down vs Nor                        |
| 2863885               | LHFPL2      | 8.76E-06           | 3.95E-12                | -3.16875                 | Cis down vs Nor                        |
| 3035892               | GNA12       | 8.98E-06           | 1.53E-13                | -2.28204                 | Cis down vs Nor                        |
| 2982319               | SOD2        | 9.32E-06           | 8.14E-13                | 4.10009                  | Cis up vs Nor                          |
| 2835531               | NDST1       | 1.03E-05           | 7.65E-08                | -2.10048                 | Cis down vs Nor                        |
| 2759582               | AFAP1       | 1.03E-05           | 5.19E-14                | -2.14471                 | Cis down vs Nor                        |
| 3555300               | CCNB1IP1    | 1.04E-05           | 0.000669063             | 2.09824                  | Cis up vs Nor                          |
| 3517793               | KLF12       | 1.06E-05           | 1.55E-24                | -3.31697                 | Cis down vs Nor                        |
| 2420427               | GNG5        | 1.10E-05           | 0.00066051              | 2.35446                  | Cis up vs Nor                          |
| 3346147               | ARHGAP42    | 1.12E-05           | 0.000121083             | -6.74962                 | Cis down vs Nor                        |
| 2977265               | HIVEP2      | 1.14E-05           | 0.00961404              | -3.06369                 | Cis down vs Nor                        |
| 2830861               | EGR1        | 1.15E-05           | 1.93E-18                | 3.47423                  | Cis up vs Nor                          |
| 2830698               | FAM53C      | 1.17E-05           | 4.50E-11                | 2.95936                  | Cis up vs Nor                          |
| 3414632               | DIP2B       | 1.18E-05           | 0.00537374              | -2.52023                 | Cis down vs Nor                        |
| 3219215               | KLF4        | 1.23E-05           | 1.32E-06                | 2.59393                  | Cis up vs Nor                          |
| 3320123               | ADM         | 1.24E-05           | 3.19E-08                | 2.83297                  | Cis up vs Nor                          |
| 3150060               | EXT1        | 1.29E-05           | 5.92E-32                | -2.98092                 | Cis down vs Nor                        |
| 3147173               | NCALD       | 1.32E-05           | 8.36E-08                | -2.21482                 | Cis down vs Nor                        |
| 3419641               | SRGAP1      | 1.32E-05           | 4.33E-09                | -3.66803                 | Cis down vs Nor                        |
| 3488602               | LRCH1       | 1.44E-05           | 2.55E-12                | -2.58557                 | Cis down vs Nor                        |
| 3508898               | STARD13     | 1.45E-05           | 2.80E-45                | -3.94034                 | Cis down vs Nor                        |
| 3228884               | VAV2        | 1.46E-05           | 1.03E-10                | -2.76453                 | Cis down vs Nor                        |
| 3217487               | ALG2        | 1.51E-05           | 0.000861354             | 2.43914                  | Cis up vs Nor                          |
| 2722377               | STIM2       | 1.53E-05           | 1.76E-22                | -2.84513                 | Cis down vs Nor                        |
| 3009198               | RHBD2       | 1.67E-05           | 2.83E-15                | 2.40908                  | Cis up vs Nor                          |
| 3598959               | SMAD3       | 1.68E-05           | 1.21E-16                | -2.52977                 | Cis down vs Nor                        |
| 3376155               | NXF1        | 1.68E-05           | 5.22E-23                | 2.73758                  | Cis up vs Nor                          |
| 2852742               | AMACR       | 1.69E-05           | 9.40E-12                | 3.98849                  | Cis up vs Nor                          |
| 3626826               | MYO1E       | 1.72E-05           | 3.83E-15                | -4.14781                 | Cis down vs Nor                        |
| 3063083               | SMURF1      | 1.74E-05           | 2.94E-13                | -2.52522                 | Cis down vs Nor                        |
| 2409104               | SLC2A1      | 1.79E-05           | 4.48E-11                | -2.37242                 | Cis down vs Nor                        |
| 2423422               | BCAR3       | 1.81E-05           | 9.35E-13                | -2.66891                 | Cis down vs Nor                        |
| 3887635               | NCOA3       | 1.87E-05           | 1.80E-15                | -2.47846                 | Cis down vs Nor                        |
| 2515471               | DLX1        | 1.95E-05           | 1.03E-05                | 2.17935                  | Cis up vs Nor                          |
| 2402111               | C1orf63     | 1.97E-05           | 1.24E-08                | 6.37443                  | Cis up vs Nor                          |
| 2842429               | C5orf25     | 1.98E-05           | 9.01E-06                | -2.07788                 | Cis down vs Nor                        |
| 2447066               | GLUL        | 2.00E-05           | 0.00550088              | 2.23039                  | Cis up vs Nor                          |
| 3291682               | JMJD1C      | 2.07E-05           | 1.40E-18                | -2.68373                 | Cis down vs Nor                        |
| 2623308               | GRM2        | 2.09E-05           | 0.000416942             | 2.3399                   | Cis up vs Nor                          |
| 3480657               | SAP18       | 2.09E-05           | 0.000192506             | 2.5312                   | Cis up vs Nor                          |
| 3723348               | HEXIM1      | 2.11E-05           | 8.35E-05                | 6.24285                  | Cis up vs Nor                          |
| 2518889               | ZNF804A     | 2.18E-05           | 1.33E-27                | -4.62297                 | Cis down vs Nor                        |
| 3219885               | PTPN3       | 2.19E-05           | 2.17E-20                | -2.06709                 | Cis down vs Nor                        |
| 3971219               | CNKSR2      | 2.21E-05           | 3.48E-16                | -2.56752                 | Cis down vs Nor                        |
| 2556752               | SPRED2      | 2.21E-05           | 2.68E-14                | -2.67497                 | Cis down vs Nor                        |
| 2835021               | PCYOX1L     | 2.26E-05           | 2.72E-09                | 3.40335                  | Cis up vs Nor                          |
| 2957596               | ELOVL5      | 2.39E-05           | 0.00253118              | -2.36114                 | Cis down vs Nor                        |
| 2326954               | TMEM222     | 2.48E-05           | 2.01E-06                | 2.61579                  | Cis up vs Nor                          |
| 3430462               | BTBD11      | 2.53E-05           | 0.000357244             | -2.36748                 | Cis down vs Nor                        |
| 3971806               | SAT1        | 2.58E-05           | 4.96E-07                | 7.57742                  | Cis up vs Nor                          |
| 2506903               | MGAT5       | 2.59E-05           | 7.12E-09                | -3.43383                 | Cis down vs Nor                        |
| 3975467               | KDM6A       | 2.61E-05           | 3.72E-20                | -4.39429                 | Cis down vs Nor                        |
| 2427208               | GSTM3       | 2.68E-05           | 2.79E-09                | 2.50123                  | Cis up vs Nor                          |
| 3772525               | CYTH1       | 2.73E-05           | 6.64E-14                | -2.22354                 | Cis down vs Nor                        |
| 3773174               | CBX4        | 2.78E-05           | 1.85E-12                | 2.11383                  | Cis up vs Nor                          |
| 3340697               | UVRAG       | 2.83E-05           | 1.06E-17                | -3.83005                 | Cis down vs Nor                        |
| 2643592               | EPHB1       | 2.86E-05           | 7.41E-12                | -2.38138                 | Cis down vs Nor                        |
| 3686339               | XPO6        | 2.88E-05           | 0.00721562              | -2.30265                 | Cis down vs Nor                        |
| 2375596               | ADORA1      | 2.92E-05           | 1.13E-11                | -2.21867                 | Cis down vs Nor                        |



|         |           |          |             |          |                 |
|---------|-----------|----------|-------------|----------|-----------------|
| 3133345 | SLC20A2   | 2.94E-05 | 4.28E-22    | -2.02587 | Cis down vs Nor |
| 3636956 | WDR73     | 3.00E-05 | 9.95E-10    | 2.03349  | Cis up vs Nor   |
| 3131881 | PPAPDC1B  | 3.05E-05 | 3.02E-14    | 2.86218  | Cis up vs Nor   |
| 3908149 | ZMYND8    | 3.09E-05 | 2.46E-27    | -2.23391 | Cis down vs Nor |
| 4014076 | HDX       | 3.10E-05 | 0.00154964  | -2.34042 | Cis down vs Nor |
| 2757347 | TMEM129   | 3.18E-05 | 3.49E-06    | 2.01113  | Cis up vs Nor   |
| 3729002 | C17orf71  | 3.21E-05 | 0.0153425   | 2.9463   | Cis up vs Nor   |
| 2964553 | BACH2     | 3.24E-05 | 1.60E-17    | -2.33195 | Cis down vs Nor |
| 3215701 | FANCC     | 3.34E-05 | 0.000220683 | -2.53346 | Cis down vs Nor |
| 2749699 | RAPGEF2   | 3.35E-05 | 1.87E-16    | -3.43972 | Cis down vs Nor |
| 2880361 | JAKMIP2   | 3.36E-05 | 1.18E-11    | -5.47856 | Cis down vs Nor |
| 3822216 | IER2      | 3.40E-05 | 1.67E-08    | 2.25056  | Cis up vs Nor   |
| 2343823 | LPHN2     | 3.42E-05 | 1.16E-26    | -3.55122 | Cis down vs Nor |
| 2397695 | CASP9     | 3.55E-05 | 5.75E-06    | -2.11615 | Cis down vs Nor |
| 3862640 | SERTAD1   | 3.56E-05 | 0.00484291  | 3.64998  | Cis up vs Nor   |
| 2369484 | TOR3A     | 3.56E-05 | 5.66E-08    | 2.02031  | Cis up vs Nor   |
| 3821893 | JUNB      | 3.69E-05 | 4.08E-05    | 3.56231  | Cis up vs Nor   |
| 2976360 | PERP      | 3.71E-05 | 0.000235364 | 2.88854  | Cis up vs Nor   |
| 3751625 | SSH2      | 3.75E-05 | 3.09E-06    | -6.22236 | Cis down vs Nor |
| 3430129 | POLR3B    | 3.78E-05 | 1.55E-09    | -3.48413 | Cis down vs Nor |
| 2957227 | TRAM2     | 3.91E-05 | 6.13E-05    | -2.48001 | Cis down vs Nor |
| 2434031 | HIST2H2BF | 3.93E-05 | 0.00271988  | 11.3433  | Cis up vs Nor   |
| 3561039 | NFKBIA    | 4.01E-05 | 0.000819888 | 2.51504  | Cis up vs Nor   |
| 2676518 | SFMBT1    | 4.02E-05 | 1.99E-19    | -2.48909 | Cis down vs Nor |
| 2398073 | FBXO42    | 4.05E-05 | 2.69E-09    | -2.42588 | Cis down vs Nor |
| 3999395 | MID1      | 4.15E-05 | 1.17E-16    | -2.92842 | Cis down vs Nor |
| 2644155 | NCK1      | 4.18E-05 | 6.33E-06    | -2.98265 | Cis down vs Nor |
| 4005392 | BCOR      | 4.20E-05 | 7.54E-05    | -2.72158 | Cis down vs Nor |
| 3858852 | RHPN2     | 4.25E-05 | 0.00199772  | -2.367   | Cis down vs Nor |
| 2583602 | RBMS1     | 4.34E-05 | 0.00585546  | -2.84181 | Cis down vs Nor |
| 3762473 | TOB1      | 4.43E-05 | 1.23E-11    | 4.78088  | Cis up vs Nor   |
| 2691014 | GSK3B     | 4.59E-05 | 3.76E-11    | -2.31857 | Cis down vs Nor |
| 3978169 | TSPYL2    | 4.69E-05 | 2.92E-11    | 4.62009  | Cis up vs Nor   |
| 3035135 | ZFAND2A   | 4.81E-05 | 4.11E-05    | 3.14552  | Cis up vs Nor   |
| 2327045 | GPR3      | 4.95E-05 | 0.000159636 | 2.09063  | Cis up vs Nor   |
| 3920566 | DYRK1A    | 5.15E-05 | 3.68E-20    | -2.76691 | Cis down vs Nor |
| 3977299 | CLCN5     | 5.19E-05 | 0.0010758   | -2.28138 | Cis down vs Nor |
| 3888522 | SNAI1     | 5.21E-05 | 0.0168137   | 2.06142  | Cis up vs Nor   |
| 2772876 | ADAMTS3   | 5.23E-05 | 0.00223431  | -3.08649 | Cis down vs Nor |
| 2319881 | PEX14     | 5.39E-05 | 4.32E-14    | -2.13883 | Cis down vs Nor |
| 2975014 | SGK1      | 5.47E-05 | 1.09E-05    | 9.78031  | Cis up vs Nor   |
| 3258221 | HHEX      | 5.54E-05 | 2.70E-14    | 3.62491  | Cis up vs Nor   |
| 3599280 | SKOR1     | 5.55E-05 | 2.72E-12    | -2.03525 | Cis down vs Nor |
| 3959918 | TST       | 5.65E-05 | 0.000654943 | 3.23168  | Cis up vs Nor   |
| 2871241 | MCC       | 5.71E-05 | 5.72E-11    | -2.13784 | Cis down vs Nor |
| 2408855 | FOXJ3     | 5.95E-05 | 1.55E-28    | -2.30948 | Cis down vs Nor |
| 2807000 | WDR70     | 6.01E-05 | 3.47E-11    | -3.17015 | Cis down vs Nor |
| 3329461 | ZNF408    | 6.04E-05 | 8.90E-07    | 2.2681   | Cis up vs Nor   |
| 3020343 | MET       | 6.07E-05 | 7.63E-22    | -2.80193 | Cis down vs Nor |
| 3139722 | NCOA2     | 6.13E-05 | 1.26E-14    | -2.87221 | Cis down vs Nor |
| 3896078 | SLC23A2   | 6.18E-05 | 3.53E-15    | -2.54526 | Cis down vs Nor |
| 2759303 | MRFAP1L1  | 6.20E-05 | 3.48E-07    | 2.11546  | Cis up vs Nor   |
| 2363562 | FCER1G    | 6.21E-05 | 6.84E-06    | 4.80948  | Cis up vs Nor   |
| 3473083 | MED13L    | 6.25E-05 | 5.50E-22    | -2.70191 | Cis down vs Nor |
| 3261165 | BTRC      | 6.37E-05 | 2.54E-22    | -3.48414 | Cis down vs Nor |
| 2899756 | HIST1H2AG | 6.37E-05 | 5.52E-09    | 2.08298  | Cis up vs Nor   |
| 3921068 | ETS2      | 6.50E-05 | 1.04E-06    | 2.11437  | Cis up vs Nor   |
| 2360887 | RUSC1     | 6.52E-05 | 3.46E-12    | 2.19242  | Cis up vs Nor   |
| 3548152 | TDP1      | 6.84E-05 | 4.53E-19    | -2.22198 | Cis down vs Nor |
| 3872542 | ZNF418    | 6.95E-05 | 5.09E-08    | 2.87255  | Cis up vs Nor   |
| 3540862 | GPHN      | 6.96E-05 | 1.33E-19    | -3.45508 | Cis down vs Nor |
| 3697632 | ZNF23     | 7.00E-05 | 8.18E-06    | 2.52678  | Cis up vs Nor   |
| 2969886 | FYN       | 7.13E-05 | 1.61E-17    | -4.51788 | Cis down vs Nor |
| 3803290 | FAM59A    | 7.20E-05 | 4.39E-16    | -2.33772 | Cis down vs Nor |
| 3730240 | TLK2      | 7.37E-05 | 3.65E-05    | -2.22485 | Cis down vs Nor |
| 3323052 | NAV2      | 7.46E-05 | 0           | -2.33621 | Cis down vs Nor |
| 3277468 | USP6NL    | 7.48E-05 | 1.79E-05    | -2.65161 | Cis down vs Nor |
| 2562233 | RETSAT    | 7.63E-05 | 8.30E-07    | 3.31098  | Cis up vs Nor   |
| 3253683 | ZMIZ1     | 7.64E-05 | 5.95E-31    | -2.73094 | Cis down vs Nor |
| 2326049 | MAN1C1    | 7.66E-05 | 2.31E-26    | -2.79963 | Cis down vs Nor |
| 3278401 | FRMD4A    | 7.70E-05 | 1.14E-31    | -2.08979 | Cis down vs Nor |
| 3490251 | WDFY2     | 7.75E-05 | 1.89E-06    | -2.52865 | Cis down vs Nor |
| 2583014 | BAZ2B     | 7.76E-05 | 2.83E-13    | -2.66658 | Cis down vs Nor |
| 3633460 | PTPN9     | 7.79E-05 | 1.79E-10    | -3.04983 | Cis down vs Nor |
| 2365210 | UCK2      | 7.96E-05 | 1.91E-09    | -2.02945 | Cis down vs Nor |
| 3392044 | C11orf71  | 7.97E-05 | 5.59E-10    | 3.33548  | Cis up vs Nor   |
| 3416344 | HOXC9     | 8.01E-05 | 1.05E-05    | 2.87937  | Cis up vs Nor   |
| 3880191 | GZF1      | 8.13E-05 | 3.18E-14    | 2.49046  | Cis up vs Nor   |
| 3719474 | TADA2A    | 8.13E-05 | 0.00127239  | -2.08269 | Cis down vs Nor |
| 2857204 | PPAP2A    | 8.17E-05 | 1.16E-09    | -2.46151 | Cis down vs Nor |
| 2998404 | RALA      | 8.42E-05 | 2.90E-06    | -2.05769 | Cis down vs Nor |
| 2369110 | RASAL2    | 8.54E-05 | 2.99E-12    | -2.92316 | Cis down vs Nor |
| 2545613 | SLC30A3   | 8.55E-05 | 7.49E-07    | 2.13403  | Cis up vs Nor   |
| 3457275 | MMP19     | 8.85E-05 | 6.00E-09    | 2.05488  | Cis up vs Nor   |
| 2869880 | EFNA5     | 8.90E-05 | 2.55E-11    | -3.53925 | Cis down vs Nor |
| 2353988 | FAM46C    | 8.93E-05 | 1.29E-06    | 3.11332  | Cis up vs Nor   |
| 2338719 | NFIA      | 8.98E-05 | 2.00E-07    | -2.3191  | Cis down vs Nor |
| 3710681 | MAP2K4    | 9.03E-05 | 0.000131748 | -2.35811 | Cis down vs Nor |

|         |          |             |             |          |                 |
|---------|----------|-------------|-------------|----------|-----------------|
| 3139035 | ARFGF1   | 9.07E-05    | 5.22E-17    | -2.22539 | Cis down vs Nor |
| 2943808 | NUP153   | 9.09E-05    | 7.35E-05    | -2.92946 | Cis down vs Nor |
| 3687308 | KCTD13   | 9.11E-05    | 2.46E-08    | 3.00047  | Cis up vs Nor   |
| 3099089 | CHCHD7   | 9.14E-05    | 0.000612858 | 2.94272  | Cis up vs Nor   |
| 3942179 | MTMR3    | 9.57E-05    | 8.56E-06    | -2.55942 | Cis down vs Nor |
| 3161566 | KDM4C    | 9.61E-05    | 0.000535688 | -2.89906 | Cis down vs Nor |
| 3381063 | CLPB     | 9.75E-05    | 2.39E-17    | -2.44163 | Cis down vs Nor |
| 3680213 | SOCS1    | 9.81E-05    | 0.00235429  | 2.01229  | Cis up vs Nor   |
| 3178147 | CTSL1    | 9.84E-05    | 0.00360388  | 2.37387  | Cis up vs Nor   |
| 3190035 | CDK9     | 9.85E-05    | 5.18E-06    | 2.2272   | Cis up vs Nor   |
| 3395464 | ASAM     | 9.91E-05    | 7.76E-06    | -2.07932 | Cis down vs Nor |
| 3201488 | CDKN2B   | 0.000100808 | 1.58E-13    | 2.43972  | Cis up vs Nor   |
| 3559192 | PRKD1    | 0.000101085 | 1.78E-15    | -2.37024 | Cis down vs Nor |
| 3353640 | GRAMD1B  | 0.00010113  | 0.000784849 | -2.62743 | Cis down vs Nor |
| 2697564 | PIK3CB   | 0.000101631 | 7.58E-12    | -4.47483 | Cis down vs Nor |
| 2410158 | TESK2    | 0.0001033   | 6.82E-11    | -2.37836 | Cis down vs Nor |
| 3213120 | GAS1     | 0.000104543 | 1.41E-08    | -2.44021 | Cis down vs Nor |
| 2586845 | SLC25A12 | 0.000106555 | 9.41E-10    | -3.70844 | Cis down vs Nor |
| 3046197 | ELMO1    | 0.000106658 | 9.14E-32    | -3.89017 | Cis down vs Nor |
| 3010030 | RSBN1L   | 0.000108138 | 3.80E-14    | -2.91003 | Cis down vs Nor |
| 2321645 | TMEM51   | 0.000108953 | 0.00476786  | -2.43499 | Cis down vs Nor |
| 3177880 | DAPK1    | 0.000110939 | 1.44E-32    | -3.83588 | Cis down vs Nor |
| 3788270 | ELAC1    | 0.00011116  | 5.50E-09    | 2.56822  | Cis up vs Nor   |
| 2739079 | SEC24B   | 0.000111733 | 1.27E-18    | -2.15061 | Cis down vs Nor |
| 3429566 | CHST11   | 0.000113263 | 5.91E-06    | -2.75609 | Cis down vs Nor |
| 2549260 | MAP4K3   | 0.000115739 | 2.58E-21    | -3.39439 | Cis down vs Nor |
| 2463482 | OPN3     | 0.000116502 | 4.22E-13    | 2.48858  | Cis up vs Nor   |
| 3132333 | TM2D2    | 0.000116755 | 0.000686607 | 2.34864  | Cis up vs Nor   |
| 3012064 | CDK14    | 0.000117046 | 7.10E-11    | -2.38108 | Cis down vs Nor |
| 3540136 | HSPA2    | 0.000117303 | 7.01E-07    | 2.46204  | Cis up vs Nor   |
| 3962678 | PACSLN2  | 0.000117723 | 1.32E-24    | -2.19358 | Cis down vs Nor |
| 3882533 | CBFA2T2  | 0.000118152 | 7.48E-10    | -2.33093 | Cis down vs Nor |
| 2509832 | EPC2     | 0.000118207 | 4.87E-07    | -3.20332 | Cis down vs Nor |
| 3483159 | PAN3     | 0.000119501 | 1.21E-19    | -2.3785  | Cis down vs Nor |
| 3049522 | TNS3     | 0.000122108 | 3.51E-37    | -2.51066 | Cis down vs Nor |
| 2965206 | EPHA7    | 0.000122149 | 8.83E-34    | -2.5066  | Cis down vs Nor |
| 3997946 | PRKX     | 0.0001229   | 3.10E-16    | -3.38415 | Cis down vs Nor |
| 3707990 | TXNDC17  | 0.000123145 | 0.0153715   | 2.57068  | Cis up vs Nor   |
| 3238231 | MLLT10   | 0.000123959 | 5.97E-14    | -3.55223 | Cis down vs Nor |
| 2748198 | KIAA0922 | 0.000126195 | 2.90E-30    | -3.70038 | Cis down vs Nor |
| 4045676 | S100A13  | 0.000127178 | 0.00651582  | 2.70277  | Cis up vs Nor   |
| 3482498 | CDK8     | 0.000128566 | 1.47E-08    | -2.73528 | Cis down vs Nor |
| 3528759 | ABHD4    | 0.000128917 | 1.38E-05    | 2.01073  | Cis up vs Nor   |
| 2930418 | UST      | 0.000131724 | 2.83E-19    | -4.66767 | Cis down vs Nor |
| 2461786 | ARID4B   | 0.000133326 | 3.83E-13    | -3.28383 | Cis down vs Nor |
| 2687255 | CSBLB    | 0.000133616 | 1.07E-08    | -2.23126 | Cis down vs Nor |
| 3140213 | MSC      | 0.000134157 | 0.0115694   | -2.41037 | Cis down vs Nor |
| 3606304 | AKAP13   | 0.000136924 | 0           | -3.30542 | Cis down vs Nor |
| 2645315 | SPSB4    | 0.000140422 | 0.000268934 | -2.62306 | Cis down vs Nor |
| 3474697 | SPPL3    | 0.000141062 | 6.18E-10    | -2.95132 | Cis down vs Nor |
| 2926323 | EYA4     | 0.000142945 | 2.27E-13    | -2.36398 | Cis down vs Nor |
| 3223157 | DBC1     | 0.000145295 | 7.65E-15    | -4.20918 | Cis down vs Nor |
| 2778856 | TSPAN5   | 0.000146599 | 1.49E-08    | -4.9065  | Cis down vs Nor |
| 3298738 | WAPAL    | 0.000146619 | 9.90E-15    | -2.07393 | Cis down vs Nor |
| 3227121 | C9orf78  | 0.000147427 | 0.000116023 | 2.207    | Cis up vs Nor   |
| 3284596 | PAR3     | 0.000147549 | 2.08E-11    | -2.4848  | Cis down vs Nor |
| 3508644 | N4BP2L1  | 0.000147587 | 6.37E-07    | 4.49192  | Cis up vs Nor   |
| 2351854 | C1orf162 | 0.000147752 | 8.80E-09    | 4.52778  | Cis up vs Nor   |
| 2899171 | HIST1H1E | 0.000148671 | 0.000513989 | -2.84497 | Cis down vs Nor |
| 3201784 | ELAVL2   | 0.000152468 | 2.34E-08    | -2.86841 | Cis down vs Nor |
| 3283920 | ARHGAP12 | 0.000152497 | 2.05E-28    | -2.92059 | Cis down vs Nor |
| 2737717 | NFKB1    | 0.000155258 | 8.02E-11    | -2.55574 | Cis down vs Nor |
| 3252382 | MYST4    | 0.000155299 | 2.52E-12    | -3.06791 | Cis down vs Nor |
| 3766960 | SMURF2   | 0.00015533  | 7.11E-10    | -2.94229 | Cis down vs Nor |
| 3764933 | TUBD1    | 0.000157112 | 6.71E-08    | -2.51209 | Cis down vs Nor |
| 2939213 | TUBB2A   | 0.000160101 | 2.07E-06    | 3.05469  | Cis up vs Nor   |
| 2975867 | MAP3K5   | 0.000161323 | 1.75E-27    | -2.89776 | Cis down vs Nor |
| 2872047 | SEMA6A   | 0.000163921 | 1.18E-08    | -3.93965 | Cis down vs Nor |
| 3321055 | TEAD1    | 0.000164685 | 0.0184074   | -3.51778 | Cis down vs Nor |
| 3662750 | POLR2C   | 0.000164994 | 0.000187347 | 2.13442  | Cis up vs Nor   |
| 3740664 | C17orf91 | 0.000166641 | 3.32E-06    | 3.62685  | Cis up vs Nor   |
| 3094611 | LETM2    | 0.000167379 | 1.08E-10    | 2.57452  | Cis up vs Nor   |
| 2943874 | KIF13A   | 0.000167732 | 3.10E-28    | -2.01122 | Cis down vs Nor |
| 3484768 | PDS5B    | 0.000169766 | 9.50E-19    | -2.72587 | Cis down vs Nor |
| 3981164 | ACRC     | 0.000171418 | 0.000373375 | 3.49004  | Cis up vs Nor   |
| 3381377 | FCHSD2   | 0.000171729 | 6.95E-06    | -3.69725 | Cis down vs Nor |
| 3721400 | EIF1     | 0.000172081 | 6.23E-07    | 3.79705  | Cis up vs Nor   |
| 2471384 | KCNS3    | 0.000174043 | 5.11E-11    | -2.40087 | Cis down vs Nor |
| 2523045 | FZD7     | 0.000176287 | 6.08E-07    | 2.69565  | Cis up vs Nor   |
| 3403077 | C12orf57 | 0.000179613 | 8.97E-09    | 3.06114  | Cis up vs Nor   |
| 3129465 | INTS9    | 0.000179802 | 0.00313256  | -2.68558 | Cis down vs Nor |
| 2498143 | NCK2     | 0.000179866 | 6.41E-10    | -2.3364  | Cis down vs Nor |
| 2652801 | NLGN1    | 0.000180333 | 9.87E-10    | -2.60292 | Cis down vs Nor |
| 3906160 | CHD6     | 0.00018112  | 3.76E-23    | -2.00651 | Cis down vs Nor |
| 2453370 | PLXNA2   | 0.000182302 | 1.51E-24    | -2.10806 | Cis down vs Nor |
| 2334279 | UROD     | 0.000183777 | 6.46E-08    | 2.85185  | Cis up vs Nor   |
| 3719210 | DHRS11   | 0.000184847 | 2.01E-10    | 2.35685  | Cis up vs Nor   |
| 3737488 | RPTOR    | 0.000186187 | 4.04E-35    | -2.32963 | Cis down vs Nor |

|         |          |             |             |          |                 |
|---------|----------|-------------|-------------|----------|-----------------|
| 2932508 | TIAM2    | 0.000187098 | 2.36E-19    | -2.97666 | Cis down vs Nor |
| 3361971 | ST5      | 0.000187348 | 2.53E-24    | -2.07278 | Cis down vs Nor |
| 2436228 | GATA2B   | 0.000188085 | 7.20E-05    | -2.23301 | Cis down vs Nor |
| 2401333 | ZNF436   | 0.000189362 | 0.0026038   | 2.36228  | Cis up vs Nor   |
| 3453177 | C12orf41 | 0.000190982 | 4.90E-22    | 2.36507  | Cis up vs Nor   |
| 4017381 | TSC22D3  | 0.000191087 | 2.63E-05    | 2.06609  | Cis up vs Nor   |
| 3843188 | ZNF547   | 0.000191425 | 3.30E-07    | 4.82616  | Cis up vs Nor   |
| 3080033 | MLL3     | 0.00019164  | 4.43E-17    | -2.09418 | Cis down vs Nor |
| 3837001 | GRLF1    | 0.000191849 | 1.29E-24    | -2.18556 | Cis down vs Nor |
| 3418534 | FAM119B  | 0.000191927 | 0.000313522 | 2.808    | Cis up vs Nor   |
| 2796384 | IRF2     | 0.000197539 | 7.06E-05    | -2.23825 | Cis down vs Nor |
| 3378007 | C11orf68 | 0.00019783  | 2.69E-08    | 2.24289  | Cis up vs Nor   |
| 3331603 | C11orf31 | 0.000199662 | 0.00172692  | 2.49885  | Cis up vs Nor   |
| 3371339 | PHF21A   | 0.000203687 | 6.86E-08    | -2.18219 | Cis down vs Nor |
| 3161167 | KIAA1432 | 0.000205128 | 3.38E-09    | -2.10866 | Cis down vs Nor |
| 2476411 | TTC27    | 0.000205712 | 0.0006463   | -2.32201 | Cis down vs Nor |
| 2893130 | FARS2    | 0.000206303 | 0.00143612  | -2.47931 | Cis down vs Nor |
| 2933392 | SYNJ2    | 0.00020801  | 1.76E-11    | -2.02611 | Cis down vs Nor |
| 2478748 | EML4     | 0.000210665 | 9.41E-12    | -2.06538 | Cis down vs Nor |
| 3063536 | TRIM4    | 0.000211699 | 5.09E-06    | 2.59006  | Cis up vs Nor   |
| 3925639 | NRIP1    | 0.000211746 | 8.77E-06    | -2.43325 | Cis down vs Nor |
| 2979267 | ULBP3    | 0.000213006 | 0.0108283   | 2.10837  | Cis up vs Nor   |
| 3715368 | NLK      | 0.000215357 | 1.27E-29    | -2.36332 | Cis down vs Nor |
| 3164221 | DENND4C  | 0.000215608 | 1.06E-06    | -2.51674 | Cis down vs Nor |
| 3300115 | PPP1R3C  | 0.000215764 | 0.000573839 | 3.82058  | Cis up vs Nor   |
| 2579572 | ZEB2     | 0.000216498 | 4.68E-05    | -2.05392 | Cis down vs Nor |
| 3258260 | EXOC6    | 0.000216987 | 1.45E-05    | -2.86289 | Cis down vs Nor |
| 2586603 | TLK1     | 0.000218384 | 1.70E-12    | -2.64835 | Cis down vs Nor |
| 3343546 | TMEM135  | 0.00021947  | 5.18E-11    | -2.12868 | Cis down vs Nor |
| 3218041 | BAAT     | 0.000220805 | 9.72E-10    | 5.53386  | Cis up vs Nor   |
| 3136888 | TOX      | 0.000221294 | 2.92E-10    | -3.33936 | Cis down vs Nor |
| 3801943 | ZNF521   | 0.000222278 | 1.32E-09    | -2.93638 | Cis down vs Nor |
| 3200982 | MLL3     | 0.000224102 | 3.20E-06    | -3.60754 | Cis down vs Nor |
| 3167325 | UBAP1    | 0.000224104 | 0.014355    | -2.12253 | Cis down vs Nor |
| 3498837 | PCCA     | 0.000225469 | 9.22E-11    | -2.40586 | Cis down vs Nor |
| 2874794 | RAPGEF6  | 0.000226771 | 1.07E-26    | -2.27093 | Cis down vs Nor |
| 2360700 | RAG1AP1  | 0.000229053 | 0.00581625  | 2.08606  | Cis up vs Nor   |
| 2401609 | HMGCL    | 0.000229774 | 5.39E-11    | 3.49375  | Cis up vs Nor   |
| 3671448 | HSBP1    | 0.000229918 | 7.36E-05    | 2.87843  | Cis up vs Nor   |
| 3304746 | USMG5    | 0.000229985 | 0.00367645  | 2.14137  | Cis up vs Nor   |
| 3666897 | WWP2     | 0.000230336 | 5.06E-06    | -2.17336 | Cis down vs Nor |
| 3405032 | ETV6     | 0.000232132 | 2.18E-10    | -2.46941 | Cis down vs Nor |
| 3998444 | HDHD1    | 0.000232889 | 2.60E-05    | -2.18408 | Cis down vs Nor |
| 3267036 | GRK5     | 0.000233714 | 7.60E-18    | -2.58264 | Cis down vs Nor |
| 3510450 | LHFP     | 0.000234354 | 1.14E-08    | -2.89461 | Cis down vs Nor |
| 3883547 | PHF20    | 0.000235653 | 5.85E-22    | -2.12397 | Cis down vs Nor |
| 2517588 | OSBPL6   | 0.000236743 | 3.05E-17    | -2.2032  | Cis down vs Nor |
| 3023483 | FAM40B   | 0.00023722  | 0.000208557 | 2.00235  | Cis up vs Nor   |
| 2852274 | MTMR12   | 0.000237746 | 4.92E-09    | -2.56172 | Cis down vs Nor |
| 3538213 | DAAM1    | 0.000237852 | 0.00796713  | -2.57357 | Cis down vs Nor |
| 2680591 | LRIG1    | 0.000238883 | 8.28E-17    | -2.14755 | Cis down vs Nor |
| 3542847 | SIPA1L1  | 0.00023917  | 2.32E-15    | -2.38309 | Cis down vs Nor |
| 3789947 | NEDD4L   | 0.00024001  | 1.36E-09    | -2.38744 | Cis down vs Nor |
| 2807949 | GHR      | 0.000241191 | 4.57E-11    | -4.23297 | Cis down vs Nor |
| 2967650 | RTN4IP1  | 0.000244042 | 5.31E-07    | -2.07906 | Cis down vs Nor |
| 3247818 | BICC1    | 0.000246453 | 6.85E-08    | -2.84303 | Cis down vs Nor |
| 2500550 | MERTK    | 0.000247662 | 7.00E-12    | -2.02331 | Cis down vs Nor |
| 4019160 | KLHL13   | 0.000247996 | 0.0160617   | -2.20055 | Cis down vs Nor |
| 2379132 | ATF3     | 0.000248489 | 1.46E-14    | 3.48667  | Cis up vs Nor   |
| 2899768 | HIST1H4I | 0.000249082 | 0.000293909 | 2.73845  | Cis up vs Nor   |
| 3517594 | DIS3     | 0.000249447 | 5.44E-15    | 2.12525  | Cis up vs Nor   |
| 3633191 | C15orf17 | 0.000249809 | 0.00212671  | 2.60214  | Cis up vs Nor   |
| 3676669 | RNPS1    | 0.000250099 | 0.0132565   | 2.22483  | Cis up vs Nor   |
| 3415915 | PFDN5    | 0.000250176 | 0.000148541 | 2.58828  | Cis up vs Nor   |
| 3400413 | ERC1     | 0.000251048 | 1.11E-24    | -2.14418 | Cis down vs Nor |
| 3286921 | 8-Mar    | 0.000251551 | 2.00E-10    | -2.32929 | Cis down vs Nor |
| 3634588 | WDR61    | 0.000255429 | 0.000620675 | 2.21525  | Cis up vs Nor   |
| 2426385 | VAV3     | 0.000255824 | 3.95E-11    | -5.02179 | Cis down vs Nor |
| 3781531 | CABLES1  | 0.000257748 | 7.47E-12    | -3.61228 | Cis down vs Nor |
| 2976626 | REPS1    | 0.000258285 | 3.13E-06    | -2.07233 | Cis down vs Nor |
| 3421897 | CNOT2    | 0.00025831  | 0.000644056 | -3.16176 | Cis down vs Nor |
| 3157660 | TSTA3    | 0.000260897 | 1.77E-05    | 2.36196  | Cis up vs Nor   |
| 3188993 | ARPC5L   | 0.000261863 | 0.0146143   | 2.43844  | Cis up vs Nor   |
| 3464983 | ATP2B1   | 0.000264261 | 2.43E-31    | -2.23315 | Cis down vs Nor |
| 3852565 | ASF1B    | 0.000266029 | 0.000435434 | 2.11183  | Cis up vs Nor   |
| 2980516 | CNKSR3   | 0.000266763 | 4.75E-05    | -2.01011 | Cis down vs Nor |
| 2694753 | C3orf25  | 0.000269374 | 9.92E-09    | 2.23863  | Cis up vs Nor   |
| 3567984 | PPP2R5E  | 0.000270336 | 1.13E-08    | -2.83315 | Cis down vs Nor |
| 3511817 | ENOX1    | 0.000270427 | 8.30E-05    | -3.44187 | Cis down vs Nor |
| 2475710 | LCLAT1   | 0.000276303 | 4.07E-09    | -2.02109 | Cis down vs Nor |
| 2648141 | MBNL1    | 0.000277441 | 2.55E-15    | -2.07658 | Cis down vs Nor |
| 3256074 | BMPR1A   | 0.000280754 | 0.00547808  | -3.56999 | Cis down vs Nor |
| 3200040 | BNC2     | 0.000283042 | 6.12E-16    | -2.59199 | Cis down vs Nor |
| 3911217 | PMEP1A   | 0.000284162 | 8.53E-19    | -2.98434 | Cis down vs Nor |
| 3019565 | C7orf53  | 0.00028503  | 1.89E-05    | 9.67771  | Cis up vs Nor   |
| 3887479 | EYA2     | 0.000287903 | 9.00E-23    | -3.241   | Cis down vs Nor |
| 2513925 | B3GALT1  | 0.000292087 | 7.70E-06    | -6.2385  | Cis down vs Nor |
| 2989050 | RAC1     | 0.000292351 | 0.000677995 | 2.15618  | Cis up vs Nor   |

|         |           |             |             |          |                 |
|---------|-----------|-------------|-------------|----------|-----------------|
| 3526831 | RASA3     | 0.000294719 | 3.41E-14    | -2.25984 | Cis down vs Nor |
| 2664452 | ANKRD28   | 0.000298411 | 7.03E-11    | -2.58663 | Cis down vs Nor |
| 3753690 | PEX12     | 0.000300407 | 0.0123892   | 2.51148  | Cis up vs Nor   |
| 3536786 | FBXO34    | 0.000302147 | 1.21E-12    | -2.05658 | Cis down vs Nor |
| 2510713 | FMNL2     | 0.000304462 | 2.36E-12    | -2.21853 | Cis down vs Nor |
| 3970476 | SCML1     | 0.00030689  | 0.000106791 | 2.6369   | Cis up vs Nor   |
| 3240452 | BAMBI     | 0.000307314 | 3.34E-06    | 3.55398  | Cis up vs Nor   |
| 2933331 | SNX9      | 0.000307395 | 6.74E-11    | -2.16164 | Cis down vs Nor |
| 3770944 | H3F3B     | 0.000308202 | 1.74E-09    | 2.0473   | Cis up vs Nor   |
| 3968122 | TBL1X     | 0.000309681 | 1.95E-19    | -2.25172 | Cis down vs Nor |
| 3302187 | ARHGAP19  | 0.00031067  | 5.27E-07    | -1.80059 | Cis down vs Nor |
| 2999303 | MRPL32    | 0.000312491 | 0.00011722  | 2.24398  | Cis up vs Nor   |
| 3362468 | SBF2      | 0.00031667  | 1.33E-12    | -2.81737 | Cis down vs Nor |
| 3190151 | SLC25A25  | 0.000317233 | 0.000268295 | 2.27264  | Cis up vs Nor   |
| 3387413 | FAM76B    | 0.000320359 | 3.22E-09    | 2.50812  | Cis up vs Nor   |
| 3970642 | CDKL5     | 0.000322346 | 2.65E-12    | -2.18861 | Cis down vs Nor |
| 3665603 | CTCF      | 0.000323698 | 3.29E-11    | -2.73766 | Cis down vs Nor |
| 2678116 | FAM116A   | 0.000325044 | 1.92E-07    | -3.34713 | Cis down vs Nor |
| 2554975 | BCL11A    | 0.000325627 | 1.31E-26    | -2.05233 | Cis down vs Nor |
| 2437307 | SCAMP3    | 0.000326849 | 4.99E-05    | 2.27887  | Cis up vs Nor   |
| 2486178 | MEI1      | 0.000330526 | 4.48E-15    | -3.40401 | Cis down vs Nor |
| 2546409 | ALK       | 0.000330957 | 4.32E-18    | -2.63956 | Cis down vs Nor |
| 2658595 | HES1      | 0.000330958 | 8.47E-09    | 3.2538   | Cis up vs Nor   |
| 2946681 | HIST1H2BJ | 0.000331006 | 3.56E-09    | 2.04791  | Cis up vs Nor   |
| 3706736 | TMEM93    | 0.000332635 | 0.00115676  | 2.05102  | Cis up vs Nor   |
| 2768396 | TEC       | 0.000333486 | 5.97E-08    | -2.99682 | Cis down vs Nor |
| 2963929 | RNGTT     | 0.000334602 | 1.40E-18    | -2.93626 | Cis down vs Nor |
| 3019793 | FOXP2     | 0.000339778 | 1.19E-06    | -3.51073 | Cis down vs Nor |
| 3082503 | ZNF596    | 0.000339847 | 0.00131447  | 2.4218   | Cis up vs Nor   |
| 2358743 | SCNM1     | 0.000342776 | 0.000113039 | 2.1447   | Cis up vs Nor   |
| 3376235 | WDR74     | 0.000343032 | 5.80E-27    | 2.32754  | Cis up vs Nor   |
| 3238466 | COMMD3    | 0.0003442   | 0.00658307  | 2.35823  | Cis up vs Nor   |
| 2782822 | NDST4     | 0.00034463  | 4.13E-06    | -2.80595 | Cis down vs Nor |
| 2603897 | TIGD1     | 0.000347896 | 2.01E-05    | 4.34465  | Cis up vs Nor   |
| 4007617 | PIM2      | 0.000350104 | 1.57E-13    | 2.71662  | Cis up vs Nor   |
| 2935475 | QKI       | 0.000350502 | 4.23E-15    | -2.23223 | Cis down vs Nor |
| 2672467 | CCDC12    | 0.000351016 | 0.000335816 | -2.45729 | Cis down vs Nor |
| 2866225 | MFC2C     | 0.000354924 | 2.63E-09    | -3.05653 | Cis down vs Nor |
| 3143660 | MMP16     | 0.000356887 | 1.25E-05    | -2.31528 | Cis down vs Nor |
| 3717539 | RHOT1     | 0.000357404 | 3.00E-08    | -2.19359 | Cis down vs Nor |
| 3328600 | TSPAN18   | 0.00036081  | 1.25E-09    | -3.96113 | Cis down vs Nor |
| 2341083 | GADD45A   | 0.000366218 | 0.000936486 | 2.10863  | Cis up vs Nor   |
| 2694931 | TMCC1     | 0.000366818 | 1.65E-09    | -2.71219 | Cis down vs Nor |
| 3447348 | SOX5      | 0.00037003  | 9.39E-21    | -2.25888 | Cis down vs Nor |
| 2400177 | CAMK2N1   | 0.000370895 | 5.97E-08    | 2.06772  | Cis up vs Nor   |
| 3081624 | LMBR1     | 0.000373952 | 3.55E-10    | -2.57393 | Cis down vs Nor |
| 3732230 | PITPNC1   | 0.000374201 | 6.88E-08    | -2.94807 | Cis down vs Nor |
| 3216671 | CTSL2     | 0.000374327 | 1.84E-07    | 2.63096  | Cis up vs Nor   |
| 3773241 | TBC1D16   | 0.000378601 | 0.0140765   | -2.95902 | Cis down vs Nor |
| 3776139 | NDC80     | 0.000381932 | 0.00185206  | -2.12429 | Cis down vs Nor |
| 3303392 | BLOC1S2   | 0.000384775 | 0.0109959   | 2.18759  | Cis up vs Nor   |
| 2600689 | EPHA4     | 0.000387923 | 4.81E-25    | -3.49629 | Cis down vs Nor |
| 3482845 | RASL11A   | 0.000390707 | 8.04E-09    | 4.34463  | Cis up vs Nor   |
| 3156307 | PTK2      | 0.000394114 | 6.29E-33    | -2.31601 | Cis down vs Nor |
| 3412345 | TMEM117   | 0.000394328 | 4.31E-07    | -4.32322 | Cis down vs Nor |
| 3453837 | TUBA1A    | 0.000394488 | 8.53E-08    | 2.06886  | Cis up vs Nor   |
| 3251490 | CCDC109A  | 0.000395544 | 4.43E-07    | -2.55725 | Cis down vs Nor |
| 3227645 | UCK1      | 0.000395912 | 3.83E-06    | 2.01025  | Cis up vs Nor   |
| 3322501 | MYOD1     | 0.000396566 | 3.76E-09    | -2.50888 | Cis down vs Nor |
| 3407229 | AEBP2     | 0.000398379 | 2.09E-26    | -2.62089 | Cis down vs Nor |
| 2746693 | ARHGAP10  | 0.000400112 | 1.37E-09    | -2.17938 | Cis down vs Nor |
| 3649052 | MKL2      | 0.000400613 | 5.13E-07    | -2.06119 | Cis down vs Nor |
| 2438458 | CRABP2    | 0.000404047 | 0.00450152  | 2.11357  | Cis up vs Nor   |
| 3105777 | WWP1      | 0.000405887 | 2.48E-05    | -2.04789 | Cis down vs Nor |
| 3884612 | SNHG11    | 0.00041131  | 1.55E-05    | 2.66243  | Cis up vs Nor   |
| 3335736 | DRAP1     | 0.000414164 | 0.0186012   | 2.05296  | Cis up vs Nor   |
| 3441941 | VAMP1     | 0.000416115 | 0.0055706   | 3.28076  | Cis up vs Nor   |
| 3635553 | STARD5    | 0.000417316 | 2.53E-11    | 3.73355  | Cis up vs Nor   |
| 3742067 | UBE2G1    | 0.000421258 | 1.93E-16    | -2.20849 | Cis down vs Nor |
| 2806799 | NIPBL     | 0.000423426 | 5.73E-09    | -2.2751  | Cis down vs Nor |
| 2810458 | GPBP1     | 0.000424719 | 8.72E-09    | -2.91821 | Cis down vs Nor |
| 3735478 | SPHK1     | 0.000426129 | 0.000147334 | 2.27832  | Cis up vs Nor   |
| 3126191 | PSD3      | 0.000426469 | 4.77E-10    | -1.80992 | Cis down vs Nor |
| 2489545 | HK2       | 0.000430397 | 4.29E-08    | -2.02541 | Cis down vs Nor |
| 3610804 | IGF1R     | 0.00043199  | 7.43E-21    | -2.42415 | Cis down vs Nor |
| 3791482 | PHLPP1    | 0.000434982 | 1.96E-19    | -3.04808 | Cis down vs Nor |
| 2909723 | CENPO     | 0.000435762 | 4.88E-06    | 2.40195  | Cis up vs Nor   |
| 2420790 | C1orf52   | 0.000440854 | 0.000627772 | 2.50217  | Cis up vs Nor   |
| 2460519 | EXOC8     | 0.000443163 | 9.19E-07    | 3.35906  | Cis up vs Nor   |
| 4024160 | ATP11C    | 0.000446927 | 1.08E-08    | -2.37656 | Cis down vs Nor |
| 3631517 | THAP10    | 0.000446978 | 8.38E-07    | 3.83568  | Cis up vs Nor   |
| 2860666 | TAF9      | 0.000453013 | 0.00271491  | 2.34146  | Cis up vs Nor   |
| 2430762 | WARS2     | 0.000453426 | 0.0181057   | -2.33703 | Cis down vs Nor |
| 3347831 | DDX10     | 0.000455451 | 1.00E-05    | -3.07431 | Cis down vs Nor |
| 3410614 | FGD4      | 0.000459235 | 8.18E-06    | -2.24499 | Cis down vs Nor |
| 2934191 | PNLDC1    | 0.00046525  | 1.31E-19    | 4.1993   | Cis up vs Nor   |
| 3062193 | SLC25A13  | 0.000466998 | 0.000331429 | -2.11672 | Cis down vs Nor |
| 3321150 | ARNTL     | 0.000467125 | 1.20E-05    | -4.23592 | Cis down vs Nor |

|         |            |             |             |          |                 |
|---------|------------|-------------|-------------|----------|-----------------|
| 4021633 | ENOX2      | 0.000473735 | 2.73E-13    | -3.16348 | Cis down vs Nor |
| 2558976 | MCEE       | 0.000473813 | 4.50E-07    | 3.02773  | Cis up vs Nor   |
| 3980745 | FOXO4      | 0.000474069 | 9.83E-06    | 2.54099  | Cis up vs Nor   |
| 2966636 | ASCC3      | 0.000474278 | 3.79E-06    | -2.25495 | Cis down vs Nor |
| 3013178 | CASD1      | 0.000474868 | 1.24E-21    | -2.54155 | Cis down vs Nor |
| 3587015 | KLF13      | 0.000477806 | 5.36E-12    | -2.12641 | Cis down vs Nor |
| 3422215 | THAP2      | 0.00048054  | 0.00343774  | 4.6598   | Cis up vs Nor   |
| 3273578 | IDI2       | 0.000480883 | 1.72E-05    | 4.34049  | Cis up vs Nor   |
| 3182984 | NIPSNAP3B  | 0.000488755 | 4.11E-06    | 5.19772  | Cis up vs Nor   |
| 3272205 | INPP5A     | 0.000490367 | 1.60E-17    | -2.15732 | Cis down vs Nor |
| 2825514 | DMXL1      | 0.000497872 | 4.96E-15    | -2.1637  | Cis down vs Nor |
| 2766359 | RFC1       | 0.000498232 | 6.23E-09    | -2.06756 | Cis down vs Nor |
| 2835715 | GPX3       | 0.000499559 | 6.00E-08    | 2.4362   | Cis up vs Nor   |
| 3546924 | FLRT2      | 0.000502258 | 1.49E-05    | -3.06202 | Cis down vs Nor |
| 3367096 | LGR4       | 0.000502972 | 5.15E-17    | -2.94737 | Cis down vs Nor |
| 3753288 | CCT6B      | 0.000504261 | 4.05E-06    | 2.44181  | Cis up vs Nor   |
| 3354535 | PKNOX2     | 0.00050769  | 2.30E-11    | -2.26261 | Cis down vs Nor |
| 3605780 | SCAND2     | 0.000511243 | 0.00729789  | 2.01139  | Cis up vs Nor   |
| 3975893 | PHF16      | 0.000512766 | 2.42E-05    | -2.22182 | Cis down vs Nor |
| 3458857 | AVIL       | 0.00051879  | 7.26E-28    | 2.16524  | Cis up vs Nor   |
| 2345617 | PKN2       | 0.000521613 | 6.38E-17    | -2.20587 | Cis down vs Nor |
| 3796992 | C18orf18   | 0.000522532 | 5.47E-06    | 2.63157  | Cis up vs Nor   |
| 3507710 | SLC7A1     | 0.000525603 | 1.92E-15    | -2.21366 | Cis down vs Nor |
| 2356181 | RBM8A      | 0.000529167 | 0.0161738   | 2.76454  | Cis up vs Nor   |
| 3281068 | PIP4K2A    | 0.000529253 | 1.85E-09    | -2.08463 | Cis down vs Nor |
| 2879312 | NR3C1      | 0.000546974 | 1.02E-18    | -2.01688 | Cis down vs Nor |
| 2712040 | ACAP2      | 0.000555885 | 2.22E-08    | -2.24493 | Cis down vs Nor |
| 3229529 | CAMSAP1    | 0.00055943  | 2.66E-25    | -2.11285 | Cis down vs Nor |
| 2947100 | HIST1H2AM  | 0.000563287 | 2.86E-10    | 2.93087  | Cis up vs Nor   |
| 2769182 | SCFD2      | 0.000566605 | 1.43E-08    | -2.30618 | Cis down vs Nor |
| 3066297 | SRPK2      | 0.000568582 | 2.32E-26    | -2.26195 | Cis down vs Nor |
| 3567469 | TRMT5      | 0.000568994 | 0.00260955  | 2.34954  | Cis up vs Nor   |
| 2873897 | 3-Mar      | 0.000570914 | 0.00012119  | -3.2207  | Cis down vs Nor |
| 2832081 | ZMAT2      | 0.000572393 | 0.00917448  | 2.05873  | Cis up vs Nor   |
| 2549565 | SLC8A1     | 0.000576239 | 4.35E-14    | -2.02308 | Cis down vs Nor |
| 3375307 | CYBASC3    | 0.000577127 | 0.0127409   | 2.63345  | Cis up vs Nor   |
| 3167220 | UBE2R2     | 0.000579124 | 4.26E-12    | -2.50812 | Cis down vs Nor |
| 3917938 | HUNK       | 0.00058614  | 3.03E-14    | -3.67486 | Cis down vs Nor |
| 2708922 | IGF2BP2    | 0.000586725 | 0.00643486  | -2.91591 | Cis down vs Nor |
| 3383322 | NARS2      | 0.000587986 | 8.25E-10    | -2.06343 | Cis down vs Nor |
| 3237788 | PLXDC2     | 0.000590216 | 3.74E-06    | -2.30845 | Cis down vs Nor |
| 2887164 | SH3PXD2B   | 0.000594127 | 0.00187564  | -3.0754  | Cis down vs Nor |
| 3575567 | FOXN3      | 0.000594428 | 3.50E-13    | -4.07766 | Cis down vs Nor |
| 3631794 | MYO9A      | 0.000598772 | 2.15E-13    | -2.11892 | Cis down vs Nor |
| 3020496 | ST7        | 0.000601425 | 4.20E-13    | -2.2175  | Cis down vs Nor |
| 2573641 | CLASP1     | 0.000616932 | 1.79E-05    | -2.04273 | Cis down vs Nor |
| 2896177 | JARID2     | 0.000626046 | 1.95E-20    | -2.94971 | Cis down vs Nor |
| 3145107 | CCNE2      | 0.000626109 | 9.44E-06    | 2.03344  | Cis up vs Nor   |
| 2372858 | RGS2       | 0.00062929  | 0.0047605   | 4.20568  | Cis up vs Nor   |
| 2380590 | TGFB2      | 0.000637118 | 2.70E-07    | -2.85367 | Cis down vs Nor |
| 3766716 | TEX2       | 0.000640675 | 2.70E-21    | -2.12779 | Cis down vs Nor |
| 3761378 | HOXB5      | 0.00064569  | 0.000233262 | 2.79497  | Cis up vs Nor   |
| 2491386 | TCF7L1     | 0.000652038 | 9.66E-24    | -2.03155 | Cis down vs Nor |
| 2582562 | ACVR1      | 0.000655812 | 3.32E-25    | -2.00833 | Cis down vs Nor |
| 2652410 | FNDC3B     | 0.000659431 | 7.43E-44    | -3.11135 | Cis down vs Nor |
| 3337067 | RPS6KB2    | 0.000661299 | 3.51E-13    | 2.02278  | Cis up vs Nor   |
| 3591674 | C15orf63   | 0.000663403 | 2.54E-12    | 3.53211  | Cis up vs Nor   |
| 3042849 | HOXA5      | 0.000665621 | 0.00143067  | 2.09361  | Cis up vs Nor   |
| 4014251 | CHM        | 0.000672112 | 9.39E-17    | -2.30839 | Cis down vs Nor |
| 2736462 | BMPR1B     | 0.000672208 | 0.0031148   | -2.19698 | Cis down vs Nor |
| 3423622 | SYT1       | 0.000676442 | 3.41E-05    | -4.34615 | Cis down vs Nor |
| 2329752 | ZMYM4      | 0.000688446 | 6.44E-10    | -2.08375 | Cis down vs Nor |
| 3592366 | SPATA5L1   | 0.00069515  | 0.00717627  | 2.17137  | Cis up vs Nor   |
| 3528994 | ACIN1      | 0.000704438 | 0.000149285 | 2.11199  | Cis up vs Nor   |
| 2776372 | WDFY3      | 0.000705697 | 7.33E-32    | -2.11714 | Cis down vs Nor |
| 3988874 | UBE2A      | 0.000706853 | 0.0114043   | 2.25963  | Cis up vs Nor   |
| 2353237 | VANGL1     | 0.000707323 | 8.88E-07    | -2.04332 | Cis down vs Nor |
| 2766893 | APBB2      | 0.000710343 | 6.30E-14    | -3.21724 | Cis down vs Nor |
| 3264621 | TCF7L2     | 0.000737955 | 1.64E-10    | -3.28078 | Cis down vs Nor |
| 3042919 | HOXA9      | 0.000739831 | 2.05E-07    | 2.26592  | Cis up vs Nor   |
| 2342738 | ST6GALNAC3 | 0.000749997 | 1.33E-06    | -2.45129 | Cis down vs Nor |
| 3254521 | TSPAN14    | 0.000762034 | 2.40E-05    | -2.21401 | Cis down vs Nor |
| 2544219 | PFN4       | 0.000773145 | 0.0154468   | 2.47883  | Cis up vs Nor   |
| 2781813 | ELOVL6     | 0.000773234 | 9.10E-07    | -3.84523 | Cis down vs Nor |
| 3140037 | EYA1       | 0.00077385  | 1.05E-37    | -2.52569 | Cis down vs Nor |
| 4043943 | INPP5B     | 0.000783727 | 0.000192974 | -2.05236 | Cis down vs Nor |
| 2705445 | PLD1       | 0.000787195 | 3.37E-07    | -2.09093 | Cis down vs Nor |
| 3945225 | MAFF       | 0.000788366 | 0.00301888  | 2.02021  | Cis up vs Nor   |
| 3832978 | ZFP36      | 0.000789357 | 0.000486464 | 2.66402  | Cis up vs Nor   |
| 2807886 | FBXO4      | 0.000794103 | 2.89E-07    | 2.00039  | Cis up vs Nor   |
| 2523635 | CYP20A1    | 0.000799943 | 6.09E-08    | -2.0456  | Cis down vs Nor |
| 3750767 | ALDOC      | 0.000801119 | 3.09E-06    | 2.91085  | Cis up vs Nor   |
| 3414561 | DIP2B      | 0.000801957 | 2.77E-11    | -1.91859 | Cis down vs Nor |
| 4027708 | MTCP1      | 0.000810061 | 0.000246142 | 2.58225  | Cis up vs Nor   |
| 2482230 | ERLEC1     | 0.000811216 | 2.28E-10    | -2.05357 | Cis down vs Nor |
| 3553690 | MARK3      | 0.000822677 | 1.71E-09    | -2.0457  | Cis down vs Nor |
| 3718555 | SLFN5      | 0.000826026 | 5.02E-08    | 3.06154  | Cis up vs Nor   |
| 3430716 | FICD       | 0.000826147 | 0.00515996  | 2.16346  | Cis up vs Nor   |

|         |          |             |             |          |                 |
|---------|----------|-------------|-------------|----------|-----------------|
| 3722182 | AOC2     | 0.000826623 | 0.000752934 | 3.85873  | Cis up vs Nor   |
| 2753880 | CDKN2AIP | 0.000829165 | 0.000105517 | 2.61671  | Cis up vs Nor   |
| 2686646 | SENP7    | 0.000829564 | 8.66E-08    | -2.54762 | Cis down vs Nor |
| 2812435 | ERBB2IP  | 0.000830162 | 6.15E-14    | -2.13397 | Cis down vs Nor |
| 2690956 | POPODC2  | 0.000836478 | 0.012748    | 2.83424  | Cis up vs Nor   |
| 2973376 | PTPRK    | 0.000842233 | 9.24E-35    | -3.12999 | Cis down vs Nor |
| 3834599 | ZNF574   | 0.00084404  | 0.0022468   | 2.00881  | Cis up vs Nor   |
| 3315549 | PSMD13   | 0.000844825 | 9.01E-08    | 2.10807  | Cis up vs Nor   |
| 2480168 | PRKCE    | 0.000848108 | 1.08E-15    | -2.34525 | Cis down vs Nor |
| 3882854 | ITCH     | 0.000848339 | 3.69E-08    | -2.05288 | Cis down vs Nor |
| 3018866 | DNAJB9   | 0.000850848 | 0.000186127 | 3.02398  | Cis up vs Nor   |
| 3286792 | C10orf25 | 0.000851461 | 0.00322233  | 2.08085  | Cis up vs Nor   |
| 3043264 | JAZF1    | 0.000864816 | 5.72E-12    | -2.04877 | Cis down vs Nor |
| 3079803 | PRKAG2   | 0.000872264 | 3.13E-11    | -2.10582 | Cis down vs Nor |
| 3669092 | TERF2IP  | 0.000892215 | 6.98E-05    | 2.17619  | Cis up vs Nor   |
| 2777487 | FAM13A   | 0.000895814 | 1.50E-08    | -2.40593 | Cis down vs Nor |
| 3526544 | DCUN1D2  | 0.00090452  | 9.35E-07    | 2.28606  | Cis up vs Nor   |
| 3592023 | B2M      | 0.000905971 | 4.19E-05    | 2.05057  | Cis up vs Nor   |
| 3382216 | ARRB1    | 0.000907551 | 0.000153627 | -2.34292 | Cis down vs Nor |
| 2419046 | ZZZ3     | 0.00093177  | 2.73E-11    | -2.3222  | Cis down vs Nor |
| 2412222 |          | 0.000940412 | 0.0132014   | 7.86714  | Cis up vs Nor   |
| 3588658 | C15orf41 | 0.000945603 | 3.90E-10    | -2.07875 | Cis down vs Nor |
| 2340078 | CACHD1   | 0.000956891 | 3.80E-08    | -3.0606  | Cis down vs Nor |
| 2487549 | MXD1     | 0.000957755 | 0.000939571 | 2.24703  | Cis up vs Nor   |
| 3522398 | DOCK9    | 0.000959142 | 9.84E-18    | -2.15507 | Cis down vs Nor |
| 3449760 | DENND5B  | 0.000961379 | 5.48E-19    | -2.29435 | Cis down vs Nor |
| 2946259 | HIST1H1T | 0.000961559 | 7.15E-05    | 3.30409  | Cis up vs Nor   |
| 2864849 | SSBP2    | 0.000961992 | 2.84E-15    | -3.38302 | Cis down vs Nor |
| 2484970 | EHBP1    | 0.000962579 | 1.42E-14    | -2.53074 | Cis down vs Nor |
| 2460189 | PGBD5    | 0.000964541 | 1.27E-07    | -2.34453 | Cis down vs Nor |
| 3618333 | MEIS2    | 0.000969683 | 1.09E-23    | -2.20685 | Cis down vs Nor |
| 2648535 | ARHGFE26 | 0.000969757 | 6.81E-18    | -2.22883 | Cis down vs Nor |
| 3168508 | MELK     | 0.000971674 | 3.51E-10    | -2.74529 | Cis down vs Nor |
| 3592401 | C15orf48 | 0.000973347 | 4.24E-06    | 4.71535  | Cis up vs Nor   |
| 2529546 | ACSL3    | 0.00097366  | 5.97E-10    | -2.11399 | Cis down vs Nor |
| 2810395 | C5orf35  | 0.00098409  | 0.000166951 | 2.37025  | Cis up vs Nor   |
| 2844709 | CNOT6    | 0.000986741 | 2.97E-15    | -2.17511 | Cis down vs Nor |
| 2973694 | ARHGAP18 | 0.000988241 | 1.28E-14    | -2.96055 | Cis down vs Nor |
| 3524999 | LIG4     | 0.00100674  | 1.82E-07    | 2.1849   | Cis up vs Nor   |
| 2412082 | FAF1     | 0.00101078  | 4.09E-06    | -2.06028 | Cis down vs Nor |
| 3694657 | CDH11    | 0.00101833  | 2.01E-17    | -2.90717 | Cis down vs Nor |
| 2599993 | ABCB6    | 0.00102064  | 9.73E-11    | 2.75377  | Cis up vs Nor   |
| 3042001 | CYCS     | 0.00102398  | 0.00131854  | 2.19784  | Cis up vs Nor   |
| 2615360 | TGFBR2   | 0.00103384  | 8.77E-14    | -2.61836 | Cis down vs Nor |
| 3397877 | ARHGAP32 | 0.00103746  | 2.06E-12    | -2.12287 | Cis down vs Nor |
| 3065963 | ORC5     | 0.00104848  | 2.67E-05    | -2.371   | Cis down vs Nor |
| 3401828 | DYRK4    | 0.00105092  | 1.24E-12    | 2.92477  | Cis up vs Nor   |
| 3851441 | ZNF442   | 0.00105238  | 0.000142266 | 2.24782  | Cis up vs Nor   |
| 3489212 | FNDC3A   | 0.00106748  | 0.0019756   | -2.14724 | Cis down vs Nor |
| 3463727 | LIN7A    | 0.00108588  | 0.0011829   | -2.31476 | Cis down vs Nor |
| 2953974 | GUCA1B   | 0.00110062  | 0.000476986 | 2.05665  | Cis up vs Nor   |
| 3830993 | HCST     | 0.00110624  | 0.000142288 | 2.33587  | Cis up vs Nor   |
| 3113894 | ZHX2     | 0.00110653  | 4.50E-10    | -2.83132 | Cis down vs Nor |
| 2739267 | RRH      | 0.00111205  | 2.51E-06    | 5.22657  | Cis up vs Nor   |
| 2473149 | NCOA1    | 0.0011226   | 5.45E-10    | -2.64805 | Cis down vs Nor |
| 3653317 | RBBP6    | 0.00112702  | 6.83E-15    | 2.27999  | Cis up vs Nor   |
| 3711262 | HS3ST3B1 | 0.00112854  | 0.00309481  | -3.36498 | Cis down vs Nor |
| 3154263 | SLA      | 0.00114185  | 0.011067    | -2.20417 | Cis down vs Nor |
| 2794792 | VEGFC    | 0.00116751  | 3.28E-15    | -2.18141 | Cis down vs Nor |
| 3988365 | WDR44    | 0.00117694  | 3.23E-10    | -2.13717 | Cis down vs Nor |
| 2532510 | GIGYF2   | 0.0011796   | 7.95E-25    | -2.15973 | Cis down vs Nor |
| 2551905 | C2orf61  | 0.00118311  | 0.00782211  | 3.24812  | Cis up vs Nor   |
| 2645579 | RASA2    | 0.00118891  | 1.44E-07    | -2.26973 | Cis down vs Nor |
| 2915357 | RWDD2A   | 0.00119032  | 3.34E-05    | 2.28733  | Cis up vs Nor   |
| 3576937 | NDUFB1   | 0.00120332  | 1.74E-05    | 2.02973  | Cis up vs Nor   |
| 2346863 | RPL5     | 0.00123111  | 0.00158115  | 2.26867  | Cis up vs Nor   |
| 2402493 | PAFAH2   | 0.00123799  | 6.02E-08    | -2.49642 | Cis down vs Nor |
| 3883013 | TP53INP2 | 0.00123816  | 1.05E-06    | 2.01923  | Cis up vs Nor   |
| 2379399 | RPS6KC1  | 0.0012529   | 4.80E-11    | -2.22469 | Cis down vs Nor |
| 3367338 | KIF18A   | 0.00126043  | 2.94E-08    | -2.04873 | Cis down vs Nor |
| 3589697 | BUB1B    | 0.00126832  | 4.73E-05    | -2.28169 | Cis down vs Nor |
| 3877809 | OTOR     | 0.00126971  | 2.45E-06    | 2.82029  | Cis up vs Nor   |
| 3996467 | PLXNA3   | 0.00127849  | 6.36E-08    | 2.07183  | Cis up vs Nor   |
| 3259785 | FRAT1    | 0.00127985  | 0.00109588  | 2.02514  | Cis up vs Nor   |
| 3005444 | TPST1    | 0.00129032  | 4.36E-07    | -2.14331 | Cis down vs Nor |
| 2510056 | LYPD6    | 0.00130317  | 4.66E-10    | -2.16307 | Cis down vs Nor |
| 3221646 | POLE3    | 0.00131349  | 0.00296683  | 2.13032  | Cis up vs Nor   |
| 3654175 | IL4R     | 0.00131777  | 0.00567404  | -2.02651 | Cis down vs Nor |
| 3587495 | SCG5     | 0.00132468  | 0.000119406 | 2.74715  | Cis up vs Nor   |
| 2540477 | ROCK2    | 0.00133106  | 1.18E-06    | -2.31244 | Cis down vs Nor |
| 3534201 | PRPF39   | 0.00136796  | 0.00188831  | 2.08459  | Cis up vs Nor   |
| 3707383 | ENO3     | 0.00137103  | 0.00046879  | 2.02666  | Cis up vs Nor   |
| 3258168 | KIF11    | 0.00138434  | 0.000154463 | -2.79957 | Cis down vs Nor |
| 3141755 | HEY1     | 0.00138502  | 0.0126793   | 2.28179  | Cis up vs Nor   |
| 3816509 | GADD45B  | 0.00138684  | 6.79E-06    | 3.24647  | Cis up vs Nor   |
| 3176933 | C9orf103 | 0.00139346  | 0.00679615  | 2.70893  | Cis up vs Nor   |
| 3774418 | MAFG     | 0.00140119  | 0.00130365  | 2.08482  | Cis up vs Nor   |
| 3507465 | SLC46A3  | 0.00141682  | 0.00309971  | -2.3269  | Cis down vs Nor |

|         |           |            |             |          |                 |
|---------|-----------|------------|-------------|----------|-----------------|
| 2629782 | EBLN2     | 0.00141891 | 0.00370556  | -2.41035 | Cis down vs Nor |
| 2332583 | CCDC30    | 0.00145771 | 1.66E-05    | 2.36874  | Cis up vs Nor   |
| 2454378 | SLC30A1   | 0.00146311 | 0.000352719 | 2.25893  | Cis up vs Nor   |
| 3784509 | ZNF271    | 0.00146954 | 0.0127826   | -2.43528 | Cis down vs Nor |
| 3765167 | USP32     | 0.00147679 | 2.35E-17    | -2.40726 | Cis down vs Nor |
| 3471753 | C12orf47  | 0.00150361 | 2.03E-06    | 2.23456  | Cis up vs Nor   |
| 3987029 | TMEM164   | 0.00151046 | 2.45E-07    | -2.00322 | Cis down vs Nor |
| 3843934 |           | 0.00151305 | 6.95E-05    | 1.52929  | Cis up vs Nor   |
| 3251393 | DDIT4     | 0.00151658 | 3.31E-08    | 2.08255  | Cis up vs Nor   |
| 3023279 | TP1P2     | 0.00151765 | 0.000104067 | 2.10986  | Cis up vs Nor   |
| 3349437 |           | 0.00153179 | 0.00190018  | -2.9564  | Cis down vs Nor |
| 3954545 | ZNF280A   | 0.00153204 | 0.00965186  | 3.9904   | Cis up vs Nor   |
| 2734018 | MRPS18C   | 0.00153438 | 0.000325818 | 2.81404  | Cis up vs Nor   |
| 3146103 | STK3      | 0.00153878 | 0.00144844  | -2.19676 | Cis down vs Nor |
| 2696764 | MSL2      | 0.00155696 | 1.12E-05    | -2.15684 | Cis down vs Nor |
| 2912860 | C6orf57   | 0.0015618  | 1.92E-05    | 2.43768  | Cis up vs Nor   |
| 2978044 |           | 0.00156435 | 0.00492906  | 9.21755  | Cis up vs Nor   |
| 3587457 | ARHGAP11A | 0.00157349 | 1.21E-06    | -2.53528 | Cis down vs Nor |
| 2754582 | SNX25     | 0.00158978 | 9.74E-07    | -2.39864 | Cis down vs Nor |
| 2856634 | ARL15     | 0.00159051 | 0.000550789 | -2.43605 | Cis down vs Nor |
| 3869396 | ZNF841    | 0.00161181 | 0.0125293   | 2.58051  | Cis up vs Nor   |
| 2642995 | TMEM108   | 0.00161174 | 0.000254295 | -2.4631  | Cis down vs Nor |
| 3336351 | CCS       | 0.00161796 | 6.81E-06    | 2.05744  | Cis up vs Nor   |
| 2518743 | NUP35     | 0.0016344  | 1.19E-05    | -2.41194 | Cis down vs Nor |
| 3576284 | RP56KA5   | 0.00163441 | 1.38E-07    | -2.28167 | Cis down vs Nor |
| 3262490 | C10orf78  | 0.00164941 | 0.00516401  | 2.38577  | Cis up vs Nor   |
| 2514122 | LASS6     | 0.00165848 | 0.000246243 | -2.20832 | Cis down vs Nor |
| 2403557 | SNORA44   | 0.00167756 | 3.75E-11    | 2.1826   | Cis up vs Nor   |
| 2866704 | ARRDC3    | 0.00168488 | 3.60E-08    | 4.75492  | Cis up vs Nor   |
| 2868523 | CHD1      | 0.00169291 | 6.68E-08    | -2.31001 | Cis down vs Nor |
| 3310041 | FGFR2     | 0.00170035 | 1.56E-25    | -3.81608 | Cis down vs Nor |
| 3459120 | LRIG3     | 0.00171118 | 1.94E-11    | -2.90069 | Cis down vs Nor |
| 2758658 | TMEM128   | 0.00173442 | 4.17E-05    | 2.72131  | Cis up vs Nor   |
| 2862380 | ANKRA2    | 0.00174674 | 0.00364036  | 2.59711  | Cis up vs Nor   |
| 2818212 | ATG10     | 0.00176557 | 9.97E-05    | -3.27197 | Cis down vs Nor |
| 3836266 | FOSB      | 0.00177215 | 1.85E-14    | 2.8371   | Cis up vs Nor   |
| 3872310 | ZNF550    | 0.00177396 | 8.38E-06    | 2.06364  | Cis up vs Nor   |
| 2899233 | HIST1H3E  | 0.00177451 | 0.000289337 | 2.49096  | Cis up vs Nor   |
| 2891092 | TRIM52    | 0.00178154 | 0.0137718   | 2.00206  | Cis up vs Nor   |
| 2933536 | TULP4     | 0.00179835 | 9.03E-35    | -2.06319 | Cis down vs Nor |
| 3445908 | EPS8      | 0.00181123 | 3.27E-08    | -2.14447 | Cis down vs Nor |
| 2850071 | MYO10     | 0.00181975 | 1.57E-17    | -2.01432 | Cis down vs Nor |
| 3862068 | EID2B     | 0.00183939 | 2.44E-05    | 2.00705  | Cis up vs Nor   |
| 2592598 | TMEFF2    | 0.00188692 | 2.98E-08    | -2.00052 | Cis down vs Nor |
| 3559497 | STRN3     | 0.00190969 | 9.55E-13    | -2.10774 | Cis down vs Nor |
| 3466826 | CDK17     | 0.00191345 | 5.35E-11    | -3.03907 | Cis down vs Nor |
| 3238962 | KIAA1217  | 0.00192702 | 1.50E-20    | -2.43848 | Cis down vs Nor |
| 3105600 | CA2       | 0.00197754 | 2.88E-07    | 2.97172  | Cis up vs Nor   |
| 3891447 | EDN3      | 0.00199372 | 4.66E-23    | -2.4993  | Cis down vs Nor |
| 3998247 | NLGN4X    | 0.00202571 | 3.45E-13    | -2.61201 | Cis down vs Nor |
| 3303059 | SLC25A28  | 0.00204993 | 7.85E-10    | 2.53588  | Cis up vs Nor   |
| 3543673 | ACOT2     | 0.00206271 | 0.0114634   | 2.26376  | Cis up vs Nor   |
| 4005859 | CASK      | 0.00206981 | 0.00460162  | -2.18286 | Cis down vs Nor |
| 3716664 | SUZ12P    | 0.00207158 | 0.00284976  | 2.19918  | Cis up vs Nor   |
| 2625793 | SLMAP     | 0.00210577 | 2.17E-06    | -2.2873  | Cis down vs Nor |
| 3193339 | RXRA      | 0.00212239 | 1.77E-11    | -2.52408 | Cis down vs Nor |
| 3407453 | PDE3A     | 0.00213342 | 1.04E-05    | -2.07386 | Cis down vs Nor |
| 2478928 | MTA3      | 0.00213564 | 3.61E-07    | -2.00188 | Cis down vs Nor |
| 3557947 | CHMP4A    | 0.00218157 | 6.15E-07    | 2.06232  | Cis up vs Nor   |
| 2495555 | UNC50     | 0.00219481 | 4.66E-09    | 2.35061  | Cis up vs Nor   |
| 4045665 | S100A14   | 0.00222144 | 3.11E-06    | 3.41326  | Cis up vs Nor   |
| 2544895 |           | 0.00222899 | 0.00098877  | -2.081   | Cis down vs Nor |
| 3038617 | NDUFA4    | 0.00227329 | 0.00831742  | 3.37272  | Cis up vs Nor   |
| 3557350 | SLC22A17  | 0.00228269 | 1.35E-05    | 2.01309  | Cis up vs Nor   |
| 2706297 | TBL1XR1   | 0.00228619 | 6.09E-06    | -2.52823 | Cis down vs Nor |
| 3384321 | RAB30     | 0.00228898 | 0.000144691 | -2.22552 | Cis down vs Nor |
| 2511820 | PKP4      | 0.00230419 | 4.49E-06    | -2.54169 | Cis down vs Nor |
| 2899176 | HIST1H2BD | 0.00232885 | 2.63E-05    | 3.39881  | Cis up vs Nor   |
| 3144740 | FP6628    | 0.00233399 | 0.000490308 | 4.98491  | Cis up vs Nor   |
| 3168990 | FRMPD1    | 0.00235342 | 2.74E-05    | -2.11702 | Cis down vs Nor |
| 3463571 | PPP1R12A  | 0.00235367 | 5.24E-10    | -2.13193 | Cis down vs Nor |
| 2374746 | NAV1      | 0.00238302 | 1.02E-22    | -2.40505 | Cis down vs Nor |
| 2519480 | GULP1     | 0.00238342 | 0.000376962 | -2.48632 | Cis down vs Nor |
| 3392996 | SIK3      | 0.00241509 | 0.000115183 | -2.40658 | Cis down vs Nor |
| 3651639 | TMEM159   | 0.00241676 | 0.00391474  | 2.11746  | Cis up vs Nor   |
| 2566711 | LYG1      | 0.00242532 | 0.00235246  | 2.22284  | Cis up vs Nor   |
| 2883878 | EBF1      | 0.00243235 | 3.06E-25    | -2.43101 | Cis down vs Nor |
| 2427898 | OVGP1     | 0.00244221 | 3.05E-06    | 4.11141  | Cis up vs Nor   |
| 3204721 | TPM2      | 0.00246517 | 6.14E-08    | 2.01109  | Cis up vs Nor   |
| 2520138 | MFSD6     | 0.00246743 | 4.11E-06    | -2.46382 | Cis down vs Nor |
| 2788143 | ANAPC10   | 0.00249831 | 0.00254162  | -2.76114 | Cis down vs Nor |
| 4001369 | SCML2     | 0.00254568 | 0.000274438 | -2.09479 | Cis down vs Nor |
| 2407985 | HEYL      | 0.00256932 | 0.00057879  | -2.11254 | Cis down vs Nor |
| 2946194 | HIST1H1A  | 0.00256964 | 0.00192278  | 2.20726  | Cis up vs Nor   |
| 3884830 | PPP1R16B  | 0.00257361 | 1.02E-16    | -2.20651 | Cis down vs Nor |
| 3047660 | GLI3      | 0.0025823  | 1.72E-17    | -2.01301 | Cis down vs Nor |
| 3842315 | ZNF580    | 0.00259462 | 0.000969447 | 2.08246  | Cis up vs Nor   |
